# Supplementary material for: Switching of the reaction enthalpy from exothermic to endothermic for decomposition of H2CO3 under confinement
Source: Royal Society of Chemistry journal article supplement (doi:10.1039/c9cp04587b), 2019-01-01
Supplement: c9cp04587b1.pdf [file c9cp04587b1.pdf]

**Supplimentary Information for**  
**Switching of Reaction Enthalpy from Exothermic to Endothermic for**  
**Decomposition of H<sub>2</sub>CO<sub>3</sub> under Confinement**

Subhasish Mallick and Pradeep Kumar\*

Department of Chemistry, Malaviya National Institute of Technology Jaipur, Jaipur,

302017, India

E-mail: pradeep.chy@mnit.ac.in

Contents

|                  |                                                                                                                      |
|------------------|----------------------------------------------------------------------------------------------------------------------|
| <b>Figure S1</b> | The geometries and structures of all the isomers of Carbonic acids.                                                  |
| <b>Table S1</b>  | Comparison of the reaction energetics for the decomposition reaction of carbonic acid                                |
| <b>Table S2</b>  | Cartesian coordinates and normal mode frequencies obtained at M06-2X/6-31G** level                                   |
| <b>Table S3</b>  | Absolute Energies (hartree) obtained at DLPNO-CCSD(T)/cc-pVTZ//M06-2X/6-31G** level of theory                        |
| <b>Table S4</b>  | Absolute Energies (hartree) in presence of OEEF obtained at M06-2X/6-31G** level of theory                           |
| <b>Table S5</b>  | Equilibrium constants in presence of OEEF along X axis for the uncatalyzed decomposition reaction of CA in gas phase |

**Figure S1:** The geometries and structures of all the isomers of Carbonic acids.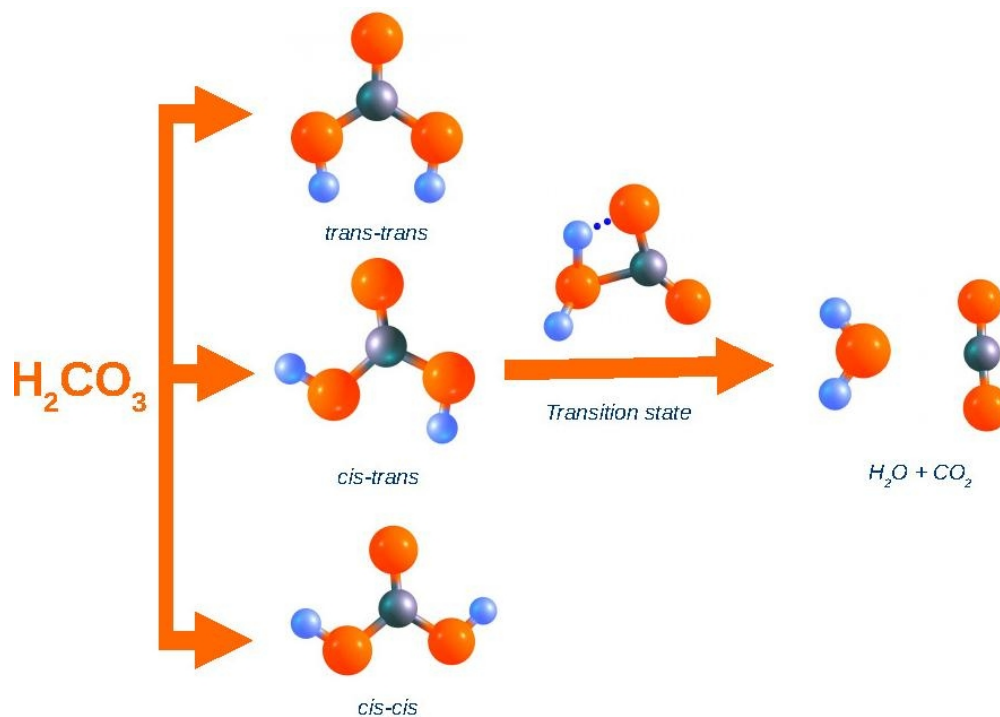**Table S1:** Comparison of the reaction energetics for the decomposition reaction of carbonic acid in gas phase.

| Level of calculations                              | Energy Barrier ( $\text{kcal mol}^{-1}$ ) | Reaction energy ( $\text{kcal mol}^{-1}$ ) |
|----------------------------------------------------|-------------------------------------------|--------------------------------------------|
| CCSD(T)/cc-pVQZ//MP2/aug-cc-pVTZ <sup>1</sup>      | 40.9                                      | -8.6                                       |
| QCISD(T)/6-31 1++G** <sup>2</sup>                  | 41.4                                      | -10.1                                      |
| CCSD(T)/aug-cc-pVTZ//MP2/aug-cc-pVTZ <sup>3</sup>  | 39.9                                      | -10.7                                      |
| DLPNO-CCSD(T)/cc-pVTZ//M06-2X/6-31G** <sup>4</sup> | 40.7                                      | -9.3                                       |

1. Wagner, J. P., Reisenauer, H. P., Hirvonen, V., Wu, C. H., Tyberg, J. L., Allen, W. D., & Schreiner, P. R. Tunnelling in carbonic acid. *Chem. Commun.*, 52(50), 2016 7858-7861.

- Wight, C. A., & Boldyrev, A. I. Potential energy surface and vibrational frequencies of carbonic acid. *J. Phys. Chem.* , 99(32), **1995**, 12125-12130.
- Bandyopadhyay, B., Biswas, P., & Kumar, P. . Ammonia as an efficient catalyst for decomposition of carbonic acid: a quantum chemical investigation. *Phys. Chem. Chem. Phys.*, 18(23), **2016**, 15995-16004.
- Present work.

**Table S2:** Cartesian coordinates and normal mode frequencies obtained at M06-2X/6-31G\*\* level:

| Species | Cartesian Coordinates |             |             |             | Frequencies |
|---------|-----------------------|-------------|-------------|-------------|-------------|
| CA      |                       |             |             |             | 493.7501    |
|         |                       |             |             |             | 552.0407    |
|         |                       |             |             |             | 580.4767    |
|         | C                     | -0.05676500 | -0.13362000 | -0.00006200 | 616.9107    |
|         | O                     | -0.76688900 | -1.09590700 | 0.00002400  | 792.9607    |
|         | O                     | 1.27588900  | -0.18033800 | 0.00001700  | 1017.1099   |
|         | H                     | 1.62666400  | 0.71995600  | 0.00001300  | 1190.0902   |
| O       | -0.48797200           | 1.14710300  | -0.00000100 | 1280.0534   |             |
| H       | -1.45429600           | 1.11489500  | 0.00003500  | 1463.4004   |             |
|         |                       |             |             | 1976.1589   |             |
|         |                       |             |             | 3873.5923   |             |
|         |                       |             |             | 3874.6811   |             |
| TS      | C                     | 0.33172900  | 0.09416900  | -0.01166100 | -1681.8080  |
|         | O                     | 1.35636000  | -0.48104500 | 0.00080600  | 425.9469    |
|         | O                     | -0.21745300 | 1.22591400  | 0.02563500  | 523.4253    |
|         | H                     | -1.23251200 | 0.47155500  | 0.03934500  | 623.1467    |
|         | O                     | -1.08119500 | -0.70943200 | -0.10216700 | 794.7900    |
|         | H                     | -1.21955300 | -1.32006100 | 0.63642600  | 809.8179    |
|         |                       |             |             | 965.8993    |             |
|         |                       |             |             | 1309.7105   |             |

|                  |   |             |             |             |                                                  |
|------------------|---|-------------|-------------|-------------|--------------------------------------------------|
|                  |   |             |             |             | 1345.9472<br>2076.6465<br>2253.0411<br>3855.4323 |
| CW               | C | 0.82312600  | -0.00038900 | 0.00129700  | 90.7296                                          |
|                  | O | 0.85679300  | 1.16242700  | 0.00561700  | 164.2839                                         |
|                  | O | 0.85389000  | -1.16331500 | 0.00558600  | 202.1752                                         |
|                  | H | -2.22270400 | -0.76591300 | 0.28251000  | 224.7235                                         |
|                  | O | -1.77200400 | 0.00113500  | -0.08287100 | 285.0313                                         |
|                  | H | -2.22548600 | 0.76626600  | 0.28304400  | 648.0541                                         |
|                  |   |             |             |             | 674.1657                                         |
|                  |   |             |             |             | 1419.0464                                        |
|                  |   |             |             |             | 1641.7909                                        |
|                  |   |             |             |             | 2489.7651                                        |
|                  |   |             |             |             | 3888.8463                                        |
|                  |   |             |             |             | 4009.9766                                        |
| CO <sub>2</sub>  | C | 0.00000000  | 0.00000000  | 0.00000100  | 668.2943                                         |
|                  | O | 0.00000000  | 0.00000000  | -1.16279200 | 668.2943                                         |
|                  | O | 0.00000000  | 0.00000000  | 1.16279200  | 1421.6361                                        |
|                  |   |             |             |             | 2492.2642                                        |
| H <sub>2</sub> O | H | 0.76025000  | -0.47119700 | 0.00000000  | 1647.4744                                        |
|                  | O | 0.00000000  | 0.11779900  | 0.00000000  | 3884.0081                                        |
|                  | H | -0.76025000 | -0.47119700 | 0.00000000  | 4000.8925                                        |
| C60              | C | -0.37074000 | -2.06297800 | -2.85172800 | 267.9640                                         |
|                  | C | 0.08809300  | -0.81892000 | -3.44190200 | 268.0433                                         |
|                  | C | 1.39027800  | -0.39000500 | -3.23132700 | 268.1336                                         |
|                  | C | 2.29413400  | -1.18531800 | -2.42060300 | 268.1875                                         |
|                  | C | 1.85557600  | -2.37418200 | -1.85643600 | 268.4123                                         |
|                  | C | 0.49297500  | -2.82295700 | -2.07690800 | 343.5538                                         |
|                  | C | -1.74919300 | -1.88042800 | -2.43533900 | 343.9544                                         |
|                  | C | -2.14232100 | -0.52347000 | -2.76817000 | 344.2744                                         |
|                  | C | -1.00676200 | 0.13246700  | -3.39021200 | 360.8684                                         |
|                  | C | -0.75088200 | 1.47065100  | -3.13038600 | 361.0736                                         |
|                  | C | 1.65798900  | 1.01029500  | -2.95915000 | 361.2257                                         |
|                  | C | 3.12037100  | -0.27639500 | -1.64729600 | 361.8077                                         |
|                  | C | 3.47172000  | -0.59680200 | -0.34421800 | 409.7212                                         |
|                  | C | 3.01283300  | -1.84096700 | 0.24607300  | 409.8624                                         |
|                  | C | 2.22308500  | -2.70940500 | -0.49288700 | 410.0426                                         |
|                  | C | 1.08772500  | -3.36557800 | 0.12931100  | 410.0577                                         |
|                  | C | 0.01844800  | -3.43577300 | -0.84973700 | 410.2300                                         |
|                  | C | -1.29882300 | -3.26130200 | -0.45174100 | 441.3583                                         |
|                  | C | -2.20267800 | -2.46599200 | -1.26254900 | 441.4536                                         |
|                  | C | -2.97148100 | 0.18789200  | -1.91356200 | 441.7074                                         |
|                  | C | -3.44599200 | -0.42484200 | -0.68636800 | 442.0044                                         |
|                  | C | -3.07031800 | -1.72162300 | -0.36824600 | 442.1782                                         |
|                  | C | -2.70275500 | -2.05692300 | 0.99525100  | 495.3983                                         |
|                  | C | -1.60785900 | -3.00838600 | 0.94364700  | 495.6086                                         |
|                  | C | -0.58603200 | -2.94125100 | 1.87920000  | 495.8956                                         |

|   |             |             |             |          |
|---|-------------|-------------|-------------|----------|
| C | 0.79227200  | -3.12384800 | 1.46278500  | 496.1992 |
| C | 1.61850300  | -2.21501500 | 2.23607000  | 507.1418 |
| C | 2.70368600  | -1.58824800 | 1.64152200  | 544.0237 |
| C | 2.72726000  | 1.08052300  | -1.98018000 | 544.7818 |
| C | 1.74919000  | 1.88043100  | 2.43533800  | 544.8423 |
| C | 2.20267500  | 2.46599500  | 1.26255100  | 548.0886 |
| C | 1.29882300  | 3.26130000  | 0.45174300  | 548.3815 |
| C | -0.01844900 | 3.43577600  | 0.84974100  | 548.4682 |
| C | -0.49297500 | 2.82296000  | 2.07690800  | 548.7310 |
| C | -0.08809400 | 0.81892000  | 3.44190100  | 549.1016 |
| C | 1.00676500  | -0.13246700 | 3.39021000  | 564.7123 |
| C | 2.14232000  | 0.52346500  | 2.76817200  | 564.7501 |
| C | 2.97147900  | -0.18789600 | 1.91356300  | 565.0896 |
| C | 3.44599300  | 0.42484100  | 0.68636200  | 575.7789 |
| C | 3.07031900  | 1.72162200  | 0.36824200  | 576.0503 |
| C | 1.60785600  | 3.00838400  | -0.94364700 | 576.1429 |
| C | 0.58603400  | 2.94124900  | -1.87919800 | 576.2192 |
| C | -0.79227500 | 3.12384500  | -1.46278400 | 581.7406 |
| C | -1.08772700 | 3.36558000  | -0.12930900 | 582.0148 |
| C | -2.22308300 | 2.70940800  | 0.49288600  | 582.7557 |
| C | -1.85557800 | 2.37418500  | 1.85643700  | 601.0651 |
| C | -2.29413200 | 1.18531800  | 2.42060000  | 601.1256 |
| C | -1.39027500 | 0.39000500  | 3.23132400  | 601.2122 |
| C | 0.75088400  | -1.47065500 | 3.13038700  | 678.0417 |
| C | -0.61165800 | -1.91956200 | 2.90980500  | 678.1351 |
| C | -1.65798900 | -1.01029600 | 2.95914700  | 678.3427 |
| C | -2.72725700 | -1.08052500 | 1.98017800  | 678.3595 |
| C | -3.12036900 | 0.27639800  | 1.64729300  | 678.4563 |
| C | -3.47171900 | 0.59680400  | 0.34422000  | 728.8763 |
| C | -3.01283500 | 1.84096700  | -0.24607600 | 729.1530 |
| C | -2.70368600 | 1.58825100  | -1.64151800 | 729.2136 |
| C | -1.61850300 | 2.21501600  | -2.23606600 | 729.7187 |
| C | 2.70275700  | 2.05692000  | -0.99524800 | 730.1033 |
| C | 0.61165800  | 1.91956000  | -2.90980600 | 732.5797 |
| C | 0.37074200  | 2.06298000  | 2.85172700  | 732.6481 |
|   |             |             |             | 733.4601 |
|   |             |             |             | 742.7086 |
|   |             |             |             | 742.8487 |
|   |             |             |             | 743.1731 |
|   |             |             |             | 753.7553 |
|   |             |             |             | 754.3317 |
|   |             |             |             | 754.8467 |
|   |             |             |             | 755.0225 |
|   |             |             |             | 755.1589 |
|   |             |             |             | 756.0687 |
|   |             |             |             | 756.1914 |
|   |             |             |             | 756.3609 |
|   |             |             |             | 756.5743 |
|   |             |             |             | 767.0029 |
|   |             |             |             | 767.8592 |

|  |  |                                                                                                                                                                                                                                                                                                                                                                                                                                                                                                                                                                                                                                                   |
|--|--|---------------------------------------------------------------------------------------------------------------------------------------------------------------------------------------------------------------------------------------------------------------------------------------------------------------------------------------------------------------------------------------------------------------------------------------------------------------------------------------------------------------------------------------------------------------------------------------------------------------------------------------------------|
|  |  | 768.2986<br>768.7651<br>768.9326<br>769.1522<br>769.2405<br>769.5348<br>803.0577<br>803.1242<br>803.1851<br>803.3312<br>803.3880<br>804.1017<br>804.4670<br>804.6418<br>838.0247<br>838.1376<br>838.3034<br>957.2189<br>988.0975<br>988.1822<br>988.3243<br>1001.0624<br>1001.1565<br>1001.2597<br>1001.3308<br>1105.1893<br>1105.2838<br>1105.4482<br>1105.5423<br>1148.3851<br>1148.5225<br>1148.7081<br>1148.9694<br>1148.9937<br>1215.9722<br>1216.0398<br>1216.2344<br>1241.4987<br>1241.7869<br>1241.8698<br>1273.1202<br>1273.5417<br>1273.5667<br>1273.7593<br>1274.1344<br>1313.4704<br>1313.8530<br>1314.0058<br>1314.5081<br>1314.6846 |
|--|--|---------------------------------------------------------------------------------------------------------------------------------------------------------------------------------------------------------------------------------------------------------------------------------------------------------------------------------------------------------------------------------------------------------------------------------------------------------------------------------------------------------------------------------------------------------------------------------------------------------------------------------------------------|

|  |  |                                                                                                                                                                                                                                                                                                                                                                                                                                                                                                                                                                                                                                                           |
|--|--|-----------------------------------------------------------------------------------------------------------------------------------------------------------------------------------------------------------------------------------------------------------------------------------------------------------------------------------------------------------------------------------------------------------------------------------------------------------------------------------------------------------------------------------------------------------------------------------------------------------------------------------------------------------|
|  |  | 1325.7956<br>1326.0233<br>1326.0502<br>1353.4419<br>1353.5837<br>1353.7713<br>1353.9301<br>1364.5286<br>1364.8866<br>1365.3129<br>1365.5021<br>1400.3873<br>1400.4447<br>1400.6103<br>1400.8652<br>1400.9892<br>1410.3713<br>1410.6996<br>1410.7442<br>1494.3900<br>1494.7068<br>1494.8973<br>1495.0101<br>1495.2967<br>1496.9858<br>1497.5371<br>1497.7131<br>1507.6564<br>1508.1722<br>1508.3193<br>1508.4464<br>1542.6256<br>1584.4769<br>1584.5932<br>1584.8686<br>1585.0018<br>1612.0073<br>1612.1786<br>1612.4371<br>1660.7636<br>1661.2744<br>1661.3485<br>1661.4426<br>1661.7471<br>1668.8670<br>1669.1569<br>1669.3463<br>1669.4606<br>1669.6600 |
|--|--|-----------------------------------------------------------------------------------------------------------------------------------------------------------------------------------------------------------------------------------------------------------------------------------------------------------------------------------------------------------------------------------------------------------------------------------------------------------------------------------------------------------------------------------------------------------------------------------------------------------------------------------------------------------|

|        |   |             |             |             |          |
|--------|---|-------------|-------------|-------------|----------|
| CA@C60 | C | 0.57233100  | -0.85303100 | 3.33439700  | 53.8354  |
|        | C | -0.86691500 | -0.67568500 | 3.30943000  | 76.1010  |
|        | C | -1.66577100 | -1.59324800 | 2.65099100  | 78.8605  |
|        | C | -1.05407000 | -2.73582200 | 1.98646400  | 216.8933 |
|        | C | 0.32842100  | -2.92889000 | 2.02065700  | 275.9727 |
|        | C | 1.15624500  | -1.94585500 | 2.70613100  | 288.3216 |
|        | C | 1.17984900  | 0.46077800  | 3.25459900  | 290.9302 |
|        | C | 0.11451900  | 1.44296600  | 3.18149400  | 295.0988 |
|        | C | -1.15584400 | 0.74303900  | 3.21418000  | 300.3476 |
|        | C | -2.24074400 | 1.19403800  | 2.47088100  | 306.1122 |
|        | C | -2.80389000 | -1.12475800 | 1.86922000  | 308.0550 |
|        | C | -1.79913100 | -2.97171300 | 0.76381200  | 360.2549 |
|        | C | -1.12062700 | -3.38647600 | -0.37760500 | 380.8774 |
|        | C | 0.33522700  | -3.60108500 | -0.35417300 | 382.0284 |
|        | C | 1.05163900  | -3.38199300 | 0.83111900  | 384.6148 |
|        | C | 2.32948200  | -2.64508000 | 0.79385700  | 387.5077 |
|        | C | 2.38375300  | -1.75774100 | 1.95522300  | 406.7346 |
|        | C | 2.95294700  | -0.48101400 | 1.86594000  | 407.2259 |
|        | C | 2.35380700  | 0.65442300  | 2.54310100  | 407.7765 |
|        | C | 0.27353100  | 2.56830400  | 2.39184100  | 408.2177 |
|        | C | 1.51583400  | 2.79422900  | 1.65418400  | 409.1427 |
|        | C | 2.54522400  | 1.85244000  | 1.72903800  | 409.7422 |
|        | C | 3.27983700  | 1.45763500  | 0.52784500  | 423.3732 |
|        | C | 3.51265600  | 0.01023400  | 0.61839100  | 457.9254 |
|        | C | 3.42774900  | -0.81365300 | -0.49963700 | 465.3323 |
|        | C | 2.83456000  | -2.16008200 | -0.42061600 | 467.8165 |
|        | C | 2.08418900  | -2.39436800 | -1.65375700 | 469.7070 |
|        | C | 0.86885900  | -3.09053200 | -1.62009500 | 472.3801 |
|        | C | -2.87815500 | -1.97474500 | 0.68993100  | 512.2868 |
|        | C | -1.17862900 | -0.46060800 | -3.25573500 | 515.3203 |
|        | C | -2.36083000 | -0.63392700 | -2.54816000 | 518.3499 |
|        | C | -3.01088300 | 0.49920800  | -1.89192300 | 530.3242 |
|        | C | -2.40297400 | 1.75477600  | -1.95833400 | 531.6348 |
|        | C | -1.15513800 | 1.92558000  | -2.69584400 | 546.4353 |
|        | C | 0.87496800  | 0.68557600  | -3.31104200 | 553.9053 |
|        | C | 1.14953900  | -0.73431600 | -3.21681100 | 555.3933 |
|        | C | -0.11619700 | -1.44524800 | -3.18066800 | 561.4741 |
|        | C | -0.25799900 | -2.58647800 | -2.40346400 | 562.6286 |
|        | C | -1.48119700 | -2.76511400 | -1.64348600 | 563.4782 |
|        | C | -2.50761900 | -1.81343000 | -1.71782700 | 564.4849 |
|        | C | -3.58971900 | 0.02329100  | -0.63325700 | 567.1837 |
|        | C | -3.51653700 | 0.84159500  | 0.50809400  | 568.9503 |
|        | C | -2.87568500 | 2.16717700  | 0.42512700  | 570.6597 |
|        | C | -2.33156700 | 2.60844300  | -0.78072200 | 572.1063 |
|        | C | -1.03224300 | 3.28846400  | -0.81032600 | 573.4203 |
|        | C | -0.31195800 | 2.88038000  | -1.99897300 | 574.5372 |
|        | C | 1.07799900  | 2.74794700  | -1.98424000 | 575.0210 |
|        | C | 1.68044500  | 1.60702900  | -2.65215100 | 576.9142 |
|        | C | 2.22104700  | -1.18743500 | -2.46643400 | 591.3001 |
|        | C | 3.05785400  | -0.22147300 | -1.77004900 | 595.4708 |



|   |             |             |             |          |
|---|-------------|-------------|-------------|----------|
| C | 2.81426500  | 1.15179300  | -1.86484200 | 598.1921 |
| C | 2.93863100  | 2.03022100  | -0.70116200 | 604.9154 |
| C | 1.85295000  | 3.02460800  | -0.77718100 | 605.7841 |
| C | 1.15789900  | 3.39708800  | 0.37519900  | 606.9126 |
| C | -0.30486900 | 3.51899700  | 0.34730900  | 611.0710 |
| C | -0.85068900 | 3.02452700  | 1.59592000  | 643.5903 |
| C | -2.08893500 | 2.37302700  | 1.63809600  | 673.2086 |
| C | -3.25777300 | -1.41165100 | -0.53072800 | 673.8551 |
| C | -3.10610400 | 0.24042700  | 1.78251100  | 674.7626 |
| C | -0.56588100 | 0.85037000  | -3.33661700 | 678.8756 |
| C | 0.06045500  | 0.10138900  | 0.00312900  | 679.1909 |
| O | 0.92830200  | 0.90489900  | 0.00558900  | 685.0276 |
| O | -1.18866200 | 0.38586000  | 0.00622800  | 685.7647 |
| H | -1.66253500 | -0.45581600 | 0.02469100  | 730.7843 |
| O | 0.24418700  | -1.17905200 | -0.00196200 | 734.1715 |
| H | 1.20309700  | -1.30513300 | 0.00297700  | 734.7946 |
|   |             |             |             | 735.9650 |
|   |             |             |             | 740.2980 |
|   |             |             |             | 741.0395 |
|   |             |             |             | 742.9879 |
|   |             |             |             | 743.7065 |
|   |             |             |             | 746.3122 |
|   |             |             |             | 748.0200 |
|   |             |             |             | 749.3291 |
|   |             |             |             | 752.1335 |
|   |             |             |             | 754.8826 |
|   |             |             |             | 755.7135 |
|   |             |             |             | 757.7157 |
|   |             |             |             | 757.8583 |
|   |             |             |             | 759.5921 |
|   |             |             |             | 761.1278 |
|   |             |             |             | 763.5185 |
|   |             |             |             | 764.1134 |
|   |             |             |             | 764.5034 |
|   |             |             |             | 770.2239 |
|   |             |             |             | 771.6050 |
|   |             |             |             | 773.9233 |
|   |             |             |             | 777.1079 |
|   |             |             |             | 779.6300 |
|   |             |             |             | 781.2028 |
|   |             |             |             | 784.9026 |
|   |             |             |             | 786.8787 |
|   |             |             |             | 792.2946 |
|   |             |             |             | 796.0102 |
|   |             |             |             | 796.7713 |
|   |             |             |             | 799.0940 |
|   |             |             |             | 799.2732 |
|   |             |             |             | 800.8831 |
|   |             |             |             | 803.1862 |
|   |             |             |             | 804.1884 |

|  |  |                                                                                                                                                                                                                                                                                                                                                                                                                                                                                                                                                                                                                                                             |
|--|--|-------------------------------------------------------------------------------------------------------------------------------------------------------------------------------------------------------------------------------------------------------------------------------------------------------------------------------------------------------------------------------------------------------------------------------------------------------------------------------------------------------------------------------------------------------------------------------------------------------------------------------------------------------------|
|  |  | 834.5633<br>834.8177<br>838.5328<br>953.9103<br>955.6461<br>955.9513<br>970.7986<br>983.0060<br>984.4356<br>988.5807<br>990.2508<br>1055.7459<br>1058.3557<br>1087.0491<br>1090.2816<br>1128.5533<br>1128.7861<br>1130.0571<br>1130.2062<br>1130.7514<br>1147.3372<br>1196.1800<br>1199.8751<br>1216.0198<br>1225.1355<br>1227.9816<br>1235.4565<br>1238.2404<br>1241.8700<br>1253.0010<br>1260.7533<br>1261.7994<br>1270.7861<br>1276.6896<br>1279.2289<br>1283.3336<br>1284.9257<br>1305.5718<br>1309.1351<br>1311.2943<br>1319.2810<br>1322.7281<br>1323.9435<br>1328.5809<br>1330.3731<br>1336.3913<br>1338.5539<br>1340.2881<br>1343.5514<br>1374.6869 |
|--|--|-------------------------------------------------------------------------------------------------------------------------------------------------------------------------------------------------------------------------------------------------------------------------------------------------------------------------------------------------------------------------------------------------------------------------------------------------------------------------------------------------------------------------------------------------------------------------------------------------------------------------------------------------------------|

|        |   |             |             |            |                                                                                                                                                                                                                                                                                                                                                                                                                                                                                                                                                                |
|--------|---|-------------|-------------|------------|----------------------------------------------------------------------------------------------------------------------------------------------------------------------------------------------------------------------------------------------------------------------------------------------------------------------------------------------------------------------------------------------------------------------------------------------------------------------------------------------------------------------------------------------------------------|
|        |   |             |             |            | 1376.7021<br>1380.8311<br>1384.4577<br>1386.3476<br>1387.8552<br>1389.5301<br>1398.1691<br>1414.4529<br>1423.9340<br>1426.7860<br>1440.1354<br>1454.9447<br>1460.5762<br>1462.1702<br>1463.6902<br>1469.5524<br>1472.9676<br>1477.0107<br>1484.6410<br>1487.9755<br>1514.9166<br>1543.7524<br>1545.2347<br>1557.0727<br>1560.9009<br>1576.4642<br>1579.1571<br>1585.3850<br>1619.1854<br>1625.1536<br>1627.0418<br>1630.6785<br>1634.1707<br>1638.8492<br>1649.3711<br>1651.0134<br>1658.7108<br>1659.3454<br>1672.7775<br>2100.2174<br>3712.1611<br>3770.1765 |
| TS@C60 | C | -1.70158700 | -0.68931300 | 2.99385700 | -1502.8701                                                                                                                                                                                                                                                                                                                                                                                                                                                                                                                                                     |
|        | C | -0.31004700 | -0.78566300 | 3.39217400 | 54.5425                                                                                                                                                                                                                                                                                                                                                                                                                                                                                                                                                        |
|        | C | 0.48175600  | 0.35124000  | 3.43347100 | 86.6201                                                                                                                                                                                                                                                                                                                                                                                                                                                                                                                                                        |
|        | C | -0.08232400 | 1.64106600  | 3.08815400 | 125.2758                                                                                                                                                                                                                                                                                                                                                                                                                                                                                                                                                       |
|        | C | -1.41608700 | 1.75318300  | 2.71493800 | 220.8528                                                                                                                                                                                                                                                                                                                                                                                                                                                                                                                                                       |
|        | C | -2.23195300 | 0.55225400  | 2.65467900 | 275.6687                                                                                                                                                                                                                                                                                                                                                                                                                                                                                                                                                       |
|        | C | -2.04199200 | -1.88462100 | 2.23261200 | 281.8812                                                                                                                                                                                                                                                                                                                                                                                                                                                                                                                                                       |

|   |             |             |             |          |
|---|-------------|-------------|-------------|----------|
| C | -0.83532400 | -2.71109500 | 2.14948400  | 291.5745 |
| C | 0.23511600  | -2.02052200 | 2.86536700  | 295.1461 |
| C | 1.54849700  | -2.04641900 | 2.40029500  | 302.6704 |
| C | 1.85729500  | 0.31233500  | 2.96331700  | 306.8650 |
| C | 0.94098300  | 2.39792600  | 2.39556200  | 309.7568 |
| C | 0.57176500  | 3.23239200  | 1.35176200  | 364.4563 |
| C | -0.83341800 | 3.37916500  | 0.95944000  | 372.4970 |
| C | -1.81352100 | 2.64341400  | 1.63128900  | 384.6404 |
| C | -2.88168600 | 1.96933900  | 0.88821600  | 390.0888 |
| C | -3.13081200 | 0.67268500  | 1.52264600  | 397.7167 |
| C | -3.44422500 | -0.47337200 | 0.78151000  | 407.2395 |
| C | -2.90485100 | -1.79002800 | 1.13979500  | 407.3221 |
| C | -0.54192700 | -3.41888200 | 0.97706500  | 407.6744 |
| C | -1.45235200 | -3.33403200 | -0.17581800 | 408.3397 |
| C | -2.60714300 | -2.52829100 | -0.09452400 | 409.0131 |
| C | -2.96268300 | -1.64139200 | -1.20812500 | 412.4206 |
| C | -3.47974000 | -0.38162200 | -0.66780300 | 415.2190 |
| C | -3.20497700 | 0.85059200  | -1.27670200 | 462.8524 |
| C | -2.91959500 | 2.06010600  | -0.50115600 | 463.9235 |
| C | -1.89241200 | 2.83503200  | -1.21030500 | 465.9473 |
| C | -0.87286700 | 3.48050600  | -0.49941000 | 469.7795 |
| C | 2.14589900  | 1.57965400  | 2.32034300  | 471.2492 |
| C | 2.02876500  | 1.86364200  | -2.20592600 | 511.6567 |
| C | 2.90864400  | 1.75546300  | -1.13428600 | 516.6197 |
| C | 3.53053200  | 0.46844700  | -0.79232900 | 522.1727 |
| C | 3.19654900  | -0.66472900 | -1.54616700 | 526.9261 |
| C | 2.26407400  | -0.54100100 | -2.66153000 | 530.1234 |
| C | 0.30914700  | 0.78176500  | -3.38157100 | 543.4354 |
| C | -0.23507600 | 2.02112600  | -2.85878300 | 555.6072 |
| C | 0.82525300  | 2.68662900  | -2.12676700 | 557.2186 |
| C | 0.51321300  | 3.38751300  | -0.97234300 | 559.4823 |
| C | 1.40532200  | 3.24218600  | 0.16503900  | 560.5304 |
| C | 2.56683100  | 2.45838000  | 0.09052100  | 562.2312 |
| C | 3.57206600  | 0.37623000  | 0.67396800  | 563.5060 |
| C | 3.27572400  | -0.84502900 | 1.29751900  | 563.8515 |
| C | 2.93147000  | -2.02643400 | 0.49977400  | 567.5864 |
| C | 2.89114800  | -1.93729900 | -0.88576300 | 571.2661 |
| C | 1.79353700  | -2.58394900 | -1.60397500 | 572.5015 |
| C | 1.41753700  | -1.72437300 | -2.70245100 | 572.8951 |
| C | 0.08397000  | -1.64334200 | -3.08762300 | 573.2226 |
| C | -0.47961400 | -0.35476800 | -3.43448100 | 577.8611 |
| C | -1.55138500 | 2.08493300  | -2.41459800 | 581.4792 |
| C | -2.36393500 | 0.87750900  | -2.45727500 | 590.3011 |
| C | -1.84810600 | -0.31250000 | -2.96004600 | 592.6352 |
| C | -2.14525400 | -1.59311000 | -2.33300200 | 595.4280 |
| C | -0.94592300 | -2.41848600 | -2.41445300 | 598.5613 |
| C | -0.59885800 | -3.26315800 | -1.36555000 | 603.2299 |
| C | 0.80274900  | -3.32127400 | -0.95270600 | 606.3752 |
| C | 0.84364600  | -3.41598900 | 0.49019500  | 612.7550 |
| C | 1.86730900  | -2.76211400 | 1.18370500  | 636.3242 |

|   |             |             |             |          |
|---|-------------|-------------|-------------|----------|
| C | 2.97000700  | 1.60998200  | 1.20129600  | 669.1989 |
| C | 2.39845800  | -0.86468300 | 2.46506000  | 673.5643 |
| C | 1.70506500  | 0.68697800  | -2.98607500 | 673.7370 |
| C | 0.17666900  | 0.14139800  | -0.03606400 | 680.2736 |
| O | 1.33251600  | -0.05426800 | -0.00235600 | 681.0012 |
| O | -0.62756400 | 1.08071600  | -0.00086500 | 683.0474 |
| H | -1.38623700 | -0.04472800 | 0.08657300  | 731.2880 |
| O | -0.71455000 | -0.95459100 | -0.07094800 | 732.7538 |
| H | -0.51293000 | -1.58360700 | 0.65408500  | 735.1202 |
|   |             |             |             | 737.9048 |
|   |             |             |             | 738.9116 |
|   |             |             |             | 741.1351 |
|   |             |             |             | 743.7932 |
|   |             |             |             | 745.2203 |
|   |             |             |             | 746.9206 |
|   |             |             |             | 747.7010 |
|   |             |             |             | 748.3911 |
|   |             |             |             | 753.8179 |
|   |             |             |             | 755.2996 |
|   |             |             |             | 757.5618 |
|   |             |             |             | 759.2290 |
|   |             |             |             | 760.0711 |
|   |             |             |             | 762.0823 |
|   |             |             |             | 762.9809 |
|   |             |             |             | 763.4693 |
|   |             |             |             | 764.5184 |
|   |             |             |             | 767.3769 |
|   |             |             |             | 770.0132 |
|   |             |             |             | 772.1553 |
|   |             |             |             | 772.5236 |
|   |             |             |             | 779.3126 |
|   |             |             |             | 782.8808 |
|   |             |             |             | 784.6794 |
|   |             |             |             | 788.1037 |
|   |             |             |             | 788.9610 |
|   |             |             |             | 792.1501 |
|   |             |             |             | 794.8795 |
|   |             |             |             | 798.4977 |
|   |             |             |             | 799.5727 |
|   |             |             |             | 801.3557 |
|   |             |             |             | 802.7796 |
|   |             |             |             | 805.4950 |
|   |             |             |             | 833.7966 |
|   |             |             |             | 834.6443 |
|   |             |             |             | 839.4666 |
|   |             |             |             | 860.3049 |
|   |             |             |             | 955.7014 |
|   |             |             |             | 955.9404 |
|   |             |             |             | 964.5079 |
|   |             |             |             | 967.0524 |

|  |  |                                                                                                                                                                                                                                                                                                                                                                                                                                                                                                                                                                                                                                                                    |
|--|--|--------------------------------------------------------------------------------------------------------------------------------------------------------------------------------------------------------------------------------------------------------------------------------------------------------------------------------------------------------------------------------------------------------------------------------------------------------------------------------------------------------------------------------------------------------------------------------------------------------------------------------------------------------------------|
|  |  | 978.0883<br>983.5713<br>990.2373<br>990.9698<br>1036.9035<br>1061.6297<br>1071.0486<br>1074.7123<br>1092.4420<br>1127.1055<br>1128.3743<br>1130.6849<br>1131.0561<br>1132.0646<br>1164.4418<br>1171.0421<br>1177.4546<br>1203.1383<br>1210.6727<br>1225.5915<br>1234.1614<br>1237.0472<br>1242.4226<br>1255.2661<br>1257.1453<br>1259.4068<br>1269.6803<br>1279.1046<br>1283.2712<br>1288.6287<br>1291.2204<br>1291.4515<br>1303.6098<br>1304.5765<br>1307.7812<br>1324.5715<br>1328.5890<br>1330.3339<br>1332.5239<br>1333.8141<br>1336.4715<br>1338.7896<br>1343.8552<br>1373.9630<br>1379.4665<br>1381.5641<br>1385.1479<br>1386.1479<br>1390.4517<br>1394.9432 |
|--|--|--------------------------------------------------------------------------------------------------------------------------------------------------------------------------------------------------------------------------------------------------------------------------------------------------------------------------------------------------------------------------------------------------------------------------------------------------------------------------------------------------------------------------------------------------------------------------------------------------------------------------------------------------------------------|

|        |   |             |             |            |                                                                                                                                                                                                                                                                                                                                                                                                                                                                     |
|--------|---|-------------|-------------|------------|---------------------------------------------------------------------------------------------------------------------------------------------------------------------------------------------------------------------------------------------------------------------------------------------------------------------------------------------------------------------------------------------------------------------------------------------------------------------|
|        |   |             |             |            | 1396.5826<br>1419.3569<br>1431.3985<br>1444.3819<br>1453.5497<br>1456.3882<br>1462.1730<br>1464.5033<br>1467.0244<br>1467.9733<br>1474.5676<br>1486.3695<br>1497.1091<br>1508.2308<br>1519.2849<br>1547.6670<br>1549.6564<br>1555.3039<br>1560.9866<br>1573.8618<br>1580.5206<br>1587.0307<br>1620.4782<br>1624.4408<br>1627.6182<br>1633.6738<br>1635.1654<br>1638.4506<br>1646.4801<br>1648.2181<br>1654.9351<br>1658.0718<br>2149.3737<br>2373.1235<br>3461.6070 |
| CW@C60 | C | 1.67863700  | 1.82068500  | 2.50869800 | 54.1663                                                                                                                                                                                                                                                                                                                                                                                                                                                             |
|        | C | 0.29123400  | 1.87060800  | 2.95203600 | 65.6009                                                                                                                                                                                                                                                                                                                                                                                                                                                             |
|        | C | -0.32511500 | 0.71312900  | 3.39672600 | 105.6251                                                                                                                                                                                                                                                                                                                                                                                                                                                            |
|        | C | 0.40698600  | -0.54003300 | 3.41787800 | 222.0983                                                                                                                                                                                                                                                                                                                                                                                                                                                            |
|        | C | 1.73032900  | -0.58433000 | 3.00109000 | 273.5902                                                                                                                                                                                                                                                                                                                                                                                                                                                            |
|        | C | 2.39831200  | 0.62609900  | 2.53920800 | 282.6518                                                                                                                                                                                                                                                                                                                                                                                                                                                            |
|        | C | 1.81184600  | 2.72290700  | 1.37574700 | 291.6481                                                                                                                                                                                                                                                                                                                                                                                                                                                            |
|        | C | 0.49430800  | 3.32663200  | 1.13916800 | 297.0908                                                                                                                                                                                                                                                                                                                                                                                                                                                            |
|        | C | -0.44349100 | 2.80858700  | 2.12100500 | 298.2256                                                                                                                                                                                                                                                                                                                                                                                                                                                            |
|        | C | -1.77470500 | 2.56320400  | 1.77501300 | 304.7484                                                                                                                                                                                                                                                                                                                                                                                                                                                            |
|        | C | -1.69870400 | 0.43509300  | 3.03350200 | 305.1951                                                                                                                                                                                                                                                                                                                                                                                                                                                            |
|        | C | -0.51504100 | -1.60466000 | 3.07302000 | 364.0350                                                                                                                                                                                                                                                                                                                                                                                                                                                            |
|        | C | -0.09311600 | -2.68962800 | 2.31493300 | 375.8165                                                                                                                                                                                                                                                                                                                                                                                                                                                            |
|        | C | 1.28589100  | -2.72030800 | 1.85517300 | 377.9889                                                                                                                                                                                                                                                                                                                                                                                                                                                            |

|   |             |             |             |          |
|---|-------------|-------------|-------------|----------|
| C | 2.18149600  | -1.70079800 | 2.19794700  | 387.9263 |
| C | 3.15072400  | -1.17857800 | 1.23366000  | 391.4666 |
| C | 3.30528500  | 0.27049100  | 1.44772200  | 405.9618 |
| C | 3.45492100  | 1.13844200  | 0.35021600  | 407.0499 |
| C | 2.68139800  | 2.39735800  | 0.32261100  | 407.0742 |
| C | 0.05433600  | 3.56260100  | -0.15408300 | 407.7919 |
| C | 0.92722500  | 3.16864000  | -1.25278500 | 408.5795 |
| C | 2.20258900  | 2.61907900  | -1.03975800 | 409.1166 |
| C | 2.67472000  | 1.50732600  | -1.85541000 | 422.9356 |
| C | 3.44308600  | 0.58392300  | -1.01306500 | 458.4791 |
| C | 3.29278500  | -0.80179100 | -1.20650300 | 462.7038 |
| C | 3.14147500  | -1.70232700 | -0.06203500 | 468.4804 |
| C | 2.18843100  | -2.76657200 | -0.41163300 | 469.1794 |
| C | 1.29132100  | -3.29069500 | 0.51980700  | 471.7424 |
| C | -1.81280200 | -1.00003300 | 2.83380800  | 501.4884 |
| C | -1.83182900 | -2.77615500 | -1.39515800 | 509.1557 |
| C | -2.65233700 | -2.41429800 | -0.32751800 | 515.7438 |
| C | -3.34734200 | -1.12108300 | -0.34622600 | 520.5787 |
| C | -3.23368300 | -0.24473100 | -1.41681600 | 528.7188 |
| C | -2.36458900 | -0.61965000 | -2.51370500 | 530.9228 |
| C | -0.30587000 | -1.87661200 | -2.94638400 | 552.0486 |
| C | 0.41924700  | -2.81883100 | -2.11339500 | 554.3340 |
| C | -0.52066600 | -3.39566500 | -1.15247300 | 558.4703 |
| C | -0.08916700 | -3.63557800 | 0.15460900  | 560.8365 |
| C | -0.95533300 | -3.25294100 | 1.27621800  | 562.1653 |
| C | -2.20156600 | -2.65791600 | 1.03953100  | 562.5049 |
| C | -3.34567700 | -0.56211800 | 0.98925200  | 563.5601 |
| C | -3.26666300 | 0.82246700  | 1.18746700  | 566.5732 |
| C | -3.18675300 | 1.74985900  | 0.05977100  | 570.1540 |
| C | -3.15498100 | 1.20537000  | -1.22393300 | 571.1932 |
| C | -2.20396200 | 1.72063600  | -2.20162300 | 572.2447 |
| C | -1.72362900 | 0.59094700  | -2.98910000 | 573.1560 |
| C | -0.40841400 | 0.53555400  | -3.41944300 | 576.8480 |
| C | 0.31479100  | -0.71784900 | -3.39532500 | 577.5012 |
| C | 1.73582400  | -2.52251900 | -1.76293300 | 588.6979 |
| C | 2.39835300  | -1.31242300 | -2.24009500 | 591.3076 |
| C | 1.69135400  | -0.42695500 | -3.03645900 | 592.3876 |
| C | 1.82316800  | 1.00498100  | -2.83574800 | 596.3333 |
| C | 0.51529800  | 1.59603700  | -3.06632400 | 600.5539 |
| C | 0.06829300  | 2.66321300  | -2.30314500 | 604.3011 |
| C | -1.32519200 | 2.74894500  | -1.86734500 | 608.1691 |
| C | -1.34675000 | 3.32542800  | -0.52737600 | 617.4286 |
| C | -2.25892600 | 2.83891700  | 0.41973200  | 632.2235 |
| C | -2.62596400 | -1.50321800 | 1.83430200  | 672.8112 |
| C | -2.40605400 | 1.33284000  | 2.24012300  | 673.2161 |
| C | -1.68513300 | -1.83723800 | -2.50146300 | 678.5385 |
| C | -0.28173100 | -0.06266000 | -0.02846500 | 679.0700 |
| O | -0.40223300 | -1.24285600 | -0.00500100 | 681.6654 |
| O | -0.87687700 | 0.96430800  | -0.01070600 | 707.0765 |
| H | 1.29398500  | 1.10889900  | 0.37737100  | 729.3764 |



|   |            |             |             |           |
|---|------------|-------------|-------------|-----------|
| O | 1.15851600 | 0.25247200  | -0.07435100 | 730.9553  |
| H | 1.65990900 | -0.49112500 | 0.31762300  | 732.7820  |
|   |            |             |             | 734.4933  |
|   |            |             |             | 735.5529  |
|   |            |             |             | 739.3177  |
|   |            |             |             | 739.3562  |
|   |            |             |             | 741.9240  |
|   |            |             |             | 743.9034  |
|   |            |             |             | 745.0931  |
|   |            |             |             | 745.8177  |
|   |            |             |             | 749.5348  |
|   |            |             |             | 753.0983  |
|   |            |             |             | 754.8921  |
|   |            |             |             | 756.4327  |
|   |            |             |             | 757.9598  |
|   |            |             |             | 758.4389  |
|   |            |             |             | 759.4831  |
|   |            |             |             | 760.3515  |
|   |            |             |             | 762.4102  |
|   |            |             |             | 762.6916  |
|   |            |             |             | 765.5671  |
|   |            |             |             | 767.4205  |
|   |            |             |             | 768.6033  |
|   |            |             |             | 771.3430  |
|   |            |             |             | 780.2814  |
|   |            |             |             | 781.9922  |
|   |            |             |             | 784.8418  |
|   |            |             |             | 786.0869  |
|   |            |             |             | 793.1304  |
|   |            |             |             | 794.1645  |
|   |            |             |             | 795.7181  |
|   |            |             |             | 797.5658  |
|   |            |             |             | 797.8732  |
|   |            |             |             | 801.8102  |
|   |            |             |             | 803.3600  |
|   |            |             |             | 810.8506  |
|   |            |             |             | 833.6963  |
|   |            |             |             | 834.0479  |
|   |            |             |             | 838.6438  |
|   |            |             |             | 903.5145  |
|   |            |             |             | 952.1541  |
|   |            |             |             | 955.5806  |
|   |            |             |             | 957.2946  |
|   |            |             |             | 968.6468  |
|   |            |             |             | 978.4085  |
|   |            |             |             | 982.8119  |
|   |            |             |             | 988.3618  |
|   |            |             |             | 990.2822  |
|   |            |             |             | 1056.5819 |
|   |            |             |             | 1057.8347 |

|  |  |                                                                                                                                                                                                                                                                                                                                                                                                                                                                                                                                                                                                                                                                        |
|--|--|------------------------------------------------------------------------------------------------------------------------------------------------------------------------------------------------------------------------------------------------------------------------------------------------------------------------------------------------------------------------------------------------------------------------------------------------------------------------------------------------------------------------------------------------------------------------------------------------------------------------------------------------------------------------|
|  |  | 1078.1174<br>1086.1794<br>1097.9114<br>1126.9420<br>1127.2725<br>1128.5799<br>1129.5868<br>1132.1089<br>1152.0687<br>1186.0842<br>1199.8263<br>1209.7984<br>1224.2240<br>1227.9283<br>1236.3453<br>1237.0701<br>1251.6949<br>1257.0384<br>1260.1746<br>1267.4180<br>1274.9334<br>1278.8202<br>1283.5625<br>1285.6692<br>1302.2624<br>1306.1578<br>1307.1719<br>1320.4508<br>1322.8099<br>1327.3598<br>1328.5939<br>1334.1480<br>1335.2037<br>1338.2160<br>1340.5955<br>1369.9283<br>1376.1343<br>1376.9049<br>1379.6818<br>1383.4491<br>1385.9956<br>1391.4276<br>1395.7470<br>1414.8431<br>1432.3514<br>1442.1452<br>1448.7659<br>1454.1800<br>1460.8579<br>1462.7511 |
|--|--|------------------------------------------------------------------------------------------------------------------------------------------------------------------------------------------------------------------------------------------------------------------------------------------------------------------------------------------------------------------------------------------------------------------------------------------------------------------------------------------------------------------------------------------------------------------------------------------------------------------------------------------------------------------------|

|     |   |             |             |             |                                                                                                                                                                                                                                                                                                                                                                          |
|-----|---|-------------|-------------|-------------|--------------------------------------------------------------------------------------------------------------------------------------------------------------------------------------------------------------------------------------------------------------------------------------------------------------------------------------------------------------------------|
|     |   |             |             |             | 1466.0334<br>1472.6869<br>1476.3482<br>1486.5914<br>1489.7710<br>1504.3928<br>1516.0198<br>1543.9446<br>1544.4026<br>1547.4014<br>1555.3027<br>1560.3820<br>1574.1047<br>1583.9389<br>1585.1781<br>1617.7462<br>1624.3149<br>1627.6750<br>1633.4002<br>1635.1594<br>1639.3032<br>1647.7654<br>1648.7481<br>1656.5624<br>1658.5392<br>2245.0357<br>3491.9361<br>3530.2913 |
| C70 | C | 3.21881800  | -2.05291800 | -1.25117000 | 224.7400                                                                                                                                                                                                                                                                                                                                                                 |
|     | C | 2.43895000  | -2.96994600 | -0.45077100 | 224.9217                                                                                                                                                                                                                                                                                                                                                                 |
|     | C | 3.96587400  | -1.05272600 | -0.64171200 | 251.4000                                                                                                                                                                                                                                                                                                                                                                 |
|     | C | 2.43886200  | -2.85823400 | 0.92355200  | 251.5511                                                                                                                                                                                                                                                                                                                                                                 |
|     | C | 1.20096500  | -3.03066600 | 1.66166800  | 260.5787                                                                                                                                                                                                                                                                                                                                                                 |
|     | C | 0.00000000  | -3.40533900 | 1.01354600  | 305.6181                                                                                                                                                                                                                                                                                                                                                                 |
|     | C | -1.20096500 | -3.03066600 | 1.66166800  | 306.3610                                                                                                                                                                                                                                                                                                                                                                 |
|     | C | 3.21863600  | 0.55570900  | -2.33923100 | 310.3970                                                                                                                                                                                                                                                                                                                                                                 |
|     | C | 2.43894600  | -0.48932600 | -2.96362900 | 311.3804                                                                                                                                                                                                                                                                                                                                                                 |
|     | C | 3.96602700  | 0.28534000  | -1.19986400 | 324.5200                                                                                                                                                                                                                                                                                                                                                                 |
|     | C | 2.43896200  | -1.76215100 | -2.43282300 | 333.8299                                                                                                                                                                                                                                                                                                                                                                 |
|     | C | 1.20070200  | -2.51671300 | -2.36797700 | 334.4657                                                                                                                                                                                                                                                                                                                                                                 |
|     | C | 0.00000000  | -2.01570100 | -2.92430400 | 343.5212                                                                                                                                                                                                                                                                                                                                                                 |
|     | C | -1.20070200 | -2.51671300 | -2.36797700 | 367.7414                                                                                                                                                                                                                                                                                                                                                                 |
|     | C | 0.00000000  | -3.52364600 | -0.45098300 | 368.1251                                                                                                                                                                                                                                                                                                                                                                 |
|     | C | 1.20082000  | -3.25850400 | -1.15117600 | 391.1095                                                                                                                                                                                                                                                                                                                                                                 |
|     | C | -1.20082000 | -3.25850400 | -1.15117600 | 391.9826                                                                                                                                                                                                                                                                                                                                                                 |
|     | C | 3.21812400  | 2.39655800  | -0.19453000 | 404.4716                                                                                                                                                                                                                                                                                                                                                                 |
|     | C | 2.43865900  | 2.66804400  | -1.38122100 | 417.7400                                                                                                                                                                                                                                                                                                                                                                 |
|     | C | 3.96573400  | 1.22950500  | -0.09981900 | 417.9494                                                                                                                                                                                                                                                                                                                                                                 |
|     | C | 2.43898000  | 1.76988500  | -2.42788100 | 418.3440                                                                                                                                                                                                                                                                                                                                                                 |

|   |             |             |             |          |
|---|-------------|-------------|-------------|----------|
| C | 1.20083200  | 1.47448000  | -3.12549300 | 418.5762 |
| C | 0.00000000  | 2.15780500  | -2.82056600 | 426.9079 |
| C | -1.20083200 | 1.47448000  | -3.12549300 | 427.7853 |
| C | 0.00000000  | -0.65979200 | -3.48974700 | 436.9693 |
| C | 1.20086600  | 0.08771800  | -3.45445800 | 437.7508 |
| C | -1.20086600 | 0.08771800  | -3.45445800 | 465.4612 |
| C | 3.21818600  | 0.92551800  | 2.21854400  | 470.5004 |
| C | 2.43885300  | 2.13812400  | 2.11060800  | 492.3722 |
| C | 3.96591100  | 0.47501700  | 1.13802800  | 493.2474 |
| C | 2.43884300  | 2.85620400  | 0.93304600  | 501.1737 |
| C | 1.20062000  | 3.42809100  | 0.43683000  | 518.0962 |
| C | 0.00000000  | 3.34945800  | 1.18133400  | 518.5951 |
| C | -1.20062000 | 3.42809100  | 0.43683000  | 522.7152 |
| C | 0.00000000  | 3.11514000  | -1.70627200 | 523.2562 |
| C | 1.20057500  | 3.31286200  | -0.98404100 | 525.2502 |
| C | -1.20057500 | 3.31286200  | -0.98404100 | 526.4527 |
| C | 3.21852700  | -1.82422300 | 1.56568300  | 530.2342 |
| C | 2.43889100  | -1.34668800 | 2.68541400  | 530.7918 |
| C | 3.96595300  | -0.93555600 | 0.80307300  | 544.8302 |
| C | 2.43867200  | -0.00479700 | 3.00368600  | 545.3815 |
| C | 1.20076700  | 0.64377200  | 3.39544400  | 548.1086 |
| C | 0.00000000  | -0.08866500 | 3.55026800  | 553.8262 |
| C | -1.20076700 | 0.64377200  | 3.39544400  | 554.3380 |
| C | 0.00000000  | 2.58514600  | 2.43624100  | 558.3455 |
| C | 1.20088800  | 1.95961100  | 2.84729100  | 560.8671 |
| C | -1.20088900 | 1.95961100  | 2.84729100  | 561.8364 |
| C | 0.00000000  | -1.51784700 | 3.21036300  | 565.2702 |
| C | 1.20079400  | -2.10226900 | 2.74299000  | 565.6675 |
| C | -1.20079400 | -2.10226900 | 2.74299000  | 583.1021 |
| C | -3.21818600 | 0.92551800  | 2.21854400  | 586.1755 |
| C | -2.43867200 | -0.00479700 | 3.00368600  | 592.8115 |
| C | -2.43889200 | -1.34668800 | 2.68541400  | 593.5397 |
| C | -3.96591100 | 0.47501700  | 1.13802700  | 621.4184 |
| C | -3.21812400 | 2.39655800  | -0.19453000 | 641.7156 |
| C | -2.43884300 | 2.85620400  | 0.93304600  | 642.5521 |
| C | -2.43885300 | 2.13812400  | 2.11060800  | 648.7404 |
| C | -3.96573400 | 1.22950500  | -0.09981900 | 651.8274 |
| C | -3.21863600 | 0.55570900  | -2.33923100 | 652.3145 |
| C | -2.43897900 | 1.76988500  | -2.42788100 | 678.1864 |
| C | -2.43865900 | 2.66804400  | -1.38122100 | 678.5301 |
| C | -3.96602700 | 0.28534000  | -1.19986400 | 685.6973 |
| C | -3.21881800 | -2.05291800 | -1.25117000 | 686.5677 |
| C | -2.43896200 | -1.76215100 | -2.43282400 | 687.2908 |
| C | -2.43894600 | -0.48932600 | -2.96362900 | 687.8512 |
| C | -3.96587400 | -1.05272600 | -0.64171200 | 710.5229 |
| C | -3.21852700 | -1.82422300 | 1.56568300  | 711.5549 |
| C | -2.43886200 | -2.85823400 | 0.92355200  | 724.2598 |
| C | -2.43895000 | -2.96994600 | -0.45077100 | 724.9185 |
| C | -3.96595300 | -0.93555600 | 0.80307300  | 727.6551 |
|   |             |             |             | 728.6100 |

|  |  |                                                                                                                                                                                                                                                                                                                                                                                                                                                                                                                                                                                                                            |
|--|--|----------------------------------------------------------------------------------------------------------------------------------------------------------------------------------------------------------------------------------------------------------------------------------------------------------------------------------------------------------------------------------------------------------------------------------------------------------------------------------------------------------------------------------------------------------------------------------------------------------------------------|
|  |  | 732.1822<br>737.9704<br>738.9524<br>741.0252<br>741.6656<br>741.7728<br>742.6188<br>744.8874<br>745.9119<br>746.1532<br>755.0697<br>756.8003<br>757.8902<br>761.3368<br>761.6199<br>761.8721<br>762.0675<br>762.2077<br>764.8130<br>765.5915<br>766.4681<br>766.4715<br>773.8058<br>774.6075<br>777.5340<br>778.2650<br>782.8467<br>783.0433<br>795.9527<br>796.7165<br>797.0018<br>809.1110<br>809.4564<br>843.2827<br>843.7765<br>904.5420<br>913.4591<br>938.4112<br>938.7769<br>948.3262<br>948.5353<br>949.1108<br>979.6608<br>980.1493<br>1084.6301<br>1084.9179<br>1086.5766<br>1087.3651<br>1096.8218<br>1110.3000 |
|--|--|----------------------------------------------------------------------------------------------------------------------------------------------------------------------------------------------------------------------------------------------------------------------------------------------------------------------------------------------------------------------------------------------------------------------------------------------------------------------------------------------------------------------------------------------------------------------------------------------------------------------------|

|  |  |                                                                                                                                                                                                                                                                                                                                                                                                                                                                                                                                                                                                                                                                        |
|--|--|------------------------------------------------------------------------------------------------------------------------------------------------------------------------------------------------------------------------------------------------------------------------------------------------------------------------------------------------------------------------------------------------------------------------------------------------------------------------------------------------------------------------------------------------------------------------------------------------------------------------------------------------------------------------|
|  |  | 1110.6496<br>1129.4705<br>1130.5745<br>1182.4130<br>1184.0522<br>1191.8297<br>1205.1737<br>1206.2638<br>1219.0564<br>1219.3982<br>1229.5170<br>1231.5510<br>1232.1632<br>1242.1271<br>1261.9961<br>1271.1077<br>1275.3965<br>1275.8979<br>1276.4134<br>1299.7863<br>1301.8013<br>1305.5106<br>1306.5750<br>1306.6239<br>1307.0228<br>1339.8873<br>1340.3420<br>1340.4359<br>1341.8420<br>1355.6195<br>1356.5000<br>1364.5865<br>1365.6825<br>1365.6910<br>1366.4964<br>1367.3652<br>1377.0484<br>1379.5868<br>1384.4486<br>1386.7592<br>1387.9029<br>1398.4627<br>1399.5124<br>1404.2027<br>1417.6408<br>1418.0533<br>1430.6719<br>1431.3133<br>1459.9427<br>1461.9232 |
|--|--|------------------------------------------------------------------------------------------------------------------------------------------------------------------------------------------------------------------------------------------------------------------------------------------------------------------------------------------------------------------------------------------------------------------------------------------------------------------------------------------------------------------------------------------------------------------------------------------------------------------------------------------------------------------------|

|        |   |             |             |             |                                                                                                                                                                                                                                                                                                                                                                                                                                           |
|--------|---|-------------|-------------|-------------|-------------------------------------------------------------------------------------------------------------------------------------------------------------------------------------------------------------------------------------------------------------------------------------------------------------------------------------------------------------------------------------------------------------------------------------------|
|        |   |             |             |             | 1474.4832<br>1475.5666<br>1497.1572<br>1497.8965<br>1500.1731<br>1500.8779<br>1509.1699<br>1522.3054<br>1524.5726<br>1525.1612<br>1530.6695<br>1547.8881<br>1563.2194<br>1564.0923<br>1576.1667<br>1576.6870<br>1590.6157<br>1591.9661<br>1592.1819<br>1593.5077<br>1597.8587<br>1599.4138<br>1636.1440<br>1655.3967<br>1658.8191<br>1659.4423<br>1660.1338<br>1660.6359<br>1661.7793<br>1663.0469<br>1663.0866<br>1663.3524<br>1665.4315 |
| CA@C70 | C | -3.20333600 | 0.72604000  | -2.27758100 | 37.3355                                                                                                                                                                                                                                                                                                                                                                                                                                   |
|        | C | -2.43338700 | 1.95383500  | -2.27997700 | 57.3653                                                                                                                                                                                                                                                                                                                                                                                                                                   |
|        | C | -3.95084500 | 0.36590100  | -1.16878900 | 120.2733                                                                                                                                                                                                                                                                                                                                                                                                                                  |
|        | C | -2.44483200 | 2.80553700  | -1.18735900 | 161.3627                                                                                                                                                                                                                                                                                                                                                                                                                                  |
|        | C | -1.21859300 | 3.46825600  | -0.74964000 | 165.2147                                                                                                                                                                                                                                                                                                                                                                                                                                  |
|        | C | -0.00976000 | 3.30459500  | -1.48559900 | 237.2815                                                                                                                                                                                                                                                                                                                                                                                                                                  |
|        | C | 1.19534800  | 3.42799800  | -0.74420600 | 240.4097                                                                                                                                                                                                                                                                                                                                                                                                                                  |
|        | C | -3.21937500 | -1.98023100 | -1.38872200 | 252.7742                                                                                                                                                                                                                                                                                                                                                                                                                                  |
|        | C | -2.43124800 | -1.59111700 | -2.53633700 | 254.6235                                                                                                                                                                                                                                                                                                                                                                                                                                  |
|        | C | -3.95703200 | -1.01521500 | -0.71480200 | 269.3125                                                                                                                                                                                                                                                                                                                                                                                                                                  |
|        | C | -2.42699700 | -0.27700200 | -2.96672300 | 272.8071                                                                                                                                                                                                                                                                                                                                                                                                                                  |
|        | C | -1.19519700 | 0.34084900  | -3.40667000 | 316.5762                                                                                                                                                                                                                                                                                                                                                                                                                                  |
|        | C | -0.00348200 | -0.40873000 | -3.49284700 | 324.0686                                                                                                                                                                                                                                                                                                                                                                                                                                  |
|        | C | 1.19112200  | 0.34119700  | -3.40661100 | 326.9951                                                                                                                                                                                                                                                                                                                                                                                                                                  |
|        | C | -0.00509600 | 2.38923100  | -2.64706500 | 327.4173                                                                                                                                                                                                                                                                                                                                                                                                                                  |
|        | C | -1.19757000 | 1.71068300  | -2.99342700 | 343.5224                                                                                                                                                                                                                                                                                                                                                                                                                                  |

|   |             |             |             |          |
|---|-------------|-------------|-------------|----------|
| C | 1.18967100  | 1.70611800  | -2.99036400 | 345.2985 |
| C | -3.21957700 | -1.95498000 | 1.42171600  | 345.4090 |
| C | -2.45905700 | -2.97122000 | 0.71713800  | 358.8871 |
| C | -3.95725200 | -1.00225400 | 0.73086700  | 368.6645 |
| C | -2.45896400 | -2.98398900 | -0.66624600 | 373.1604 |
| C | -1.21439300 | -3.22186900 | -1.38938700 | 396.4223 |
| C | -0.00753700 | -3.53027200 | -0.70629500 | 397.0988 |
| C | 1.19761100  | -3.18537800 | -1.37510800 | 412.5781 |
| C | -0.00582300 | -1.80688600 | -3.03765600 | 417.3699 |
| C | -1.20528600 | -2.36490100 | -2.53457200 | 424.7592 |
| C | 1.19676400  | -2.34458200 | -2.52483700 | 427.9380 |
| C | -3.20440500 | 0.76663900  | 2.26350400  | 438.3024 |
| C | -2.42800000 | -0.22398700 | 2.97013200  | 442.8123 |
| C | -3.95132200 | 0.38662300  | 1.16073100  | 444.4580 |
| C | -2.43187400 | -1.54533100 | 2.56238800  | 452.3571 |
| C | -1.20593300 | -2.31869600 | 2.57431700  | 454.3544 |
| C | -0.00689700 | -1.75207800 | 3.06827300  | 463.9613 |
| C | 1.19563300  | -2.29906900 | 2.56547100  | 469.4476 |
| C | -0.00776500 | -3.51664800 | 0.76739500  | 479.6492 |
| C | -1.21461300 | -3.19561900 | 1.44439300  | 498.7682 |
| C | 1.19695300  | -3.16007200 | 1.43075600  | 502.2023 |
| C | -3.21691500 | 2.42652100  | -0.02171100 | 513.0779 |
| C | -2.44584500 | 2.82707200  | 1.13775200  | 522.1722 |
| C | -3.94888800 | 1.23457000  | -0.01160500 | 523.1260 |
| C | -2.43474700 | 1.99472000  | 2.24533800  | 527.8607 |
| C | -1.19893800 | 1.76445100  | 2.96362900  | 527.9665 |
| C | -0.00617100 | 2.43730800  | 2.60626500  | 532.3608 |
| C | 1.18855800  | 1.75962400  | 2.96101100  | 538.7566 |
| C | -0.00485300 | -0.34626300 | 3.49933100  | 540.7780 |
| C | -1.19654800 | 0.40173400  | 3.40000100  | 541.4039 |
| C | 1.18974400  | 0.40195800  | 3.40052300  | 546.4019 |
| C | -0.01029600 | 3.33225700  | 1.42862600  | 549.5645 |
| C | -1.21905400 | 3.48212800  | 0.68912100  | 550.4808 |
| C | 1.19518700  | 3.44144200  | 0.68509400  | 555.1840 |
| C | 3.21094900  | 0.76646900  | 2.27087300  | 560.3978 |
| C | 2.42842800  | 1.98607200  | 2.24733600  | 561.8783 |
| C | 2.42620600  | 2.80014200  | 1.13322100  | 564.4061 |
| C | 3.96830200  | 0.38936800  | 1.16820100  | 565.4005 |
| C | 3.22281600  | -1.94185000 | 1.42700100  | 566.9865 |
| C | 2.43175700  | -1.53718200 | 2.56665300  | 575.8175 |
| C | 2.42958000  | -0.21947800 | 2.97853600  | 577.9256 |
| C | 3.97636600  | -0.99880000 | 0.73519200  | 583.1338 |
| C | 3.22360200  | -1.96697600 | -1.39178400 | 590.4611 |
| C | 2.44408000  | -2.94724500 | -0.66244600 | 596.1254 |
| C | 2.44377500  | -2.93492100 | 0.71473000  | 597.2325 |
| C | 3.97678600  | -1.01174300 | -0.71631700 | 601.5347 |
| C | 3.21200300  | 0.72601400  | -2.28300300 | 621.9190 |
| C | 2.43102700  | -0.27242600 | -2.97366800 | 642.4860 |
| C | 2.43301300  | -1.58271000 | -2.53888200 | 642.7695 |
| C | 3.96890100  | 0.36865200  | -1.17356200 | 651.6004 |



|   |             |             |             |          |
|---|-------------|-------------|-------------|----------|
| C | 3.20621100  | 2.41124700  | -0.02057000 | 653.0320 |
| C | 2.42648400  | 2.77918700  | -1.18104800 | 653.1553 |
| C | 2.42923900  | 1.94557100  | -2.28069700 | 666.5803 |
| C | 3.96274400  | 1.23570000  | -0.01022500 | 677.6289 |
| C | -0.02521400 | -0.15383500 | 0.00011800  | 678.8817 |
| O | -0.86843600 | -1.00169400 | 0.00195000  | 686.7392 |
| O | 1.28133800  | -0.36192400 | -0.00207500 | 687.1054 |
| H | 1.74180900  | 0.49431500  | -0.00044800 | 690.4248 |
| O | -0.32334800 | 1.12470100  | -0.00022300 | 692.4342 |
| H | -1.29390100 | 1.16408200  | 0.00743700  | 711.7473 |
|   |             |             |             | 716.4646 |
|   |             |             |             | 723.5677 |
|   |             |             |             | 726.3807 |
|   |             |             |             | 728.6082 |
|   |             |             |             | 730.8011 |
|   |             |             |             | 734.2888 |
|   |             |             |             | 737.8055 |
|   |             |             |             | 739.0354 |
|   |             |             |             | 739.9612 |
|   |             |             |             | 743.4508 |
|   |             |             |             | 744.6696 |
|   |             |             |             | 745.8889 |
|   |             |             |             | 748.7631 |
|   |             |             |             | 749.9702 |
|   |             |             |             | 754.6980 |
|   |             |             |             | 756.2065 |
|   |             |             |             | 756.9783 |
|   |             |             |             | 757.7600 |
|   |             |             |             | 757.9639 |
|   |             |             |             | 759.1195 |
|   |             |             |             | 761.9391 |
|   |             |             |             | 762.4144 |
|   |             |             |             | 765.0679 |
|   |             |             |             | 766.2008 |
|   |             |             |             | 769.2219 |
|   |             |             |             | 770.4319 |
|   |             |             |             | 770.8859 |
|   |             |             |             | 771.8543 |
|   |             |             |             | 772.9736 |
|   |             |             |             | 774.3372 |
|   |             |             |             | 780.4845 |
|   |             |             |             | 781.4606 |
|   |             |             |             | 783.5580 |
|   |             |             |             | 785.8692 |
|   |             |             |             | 795.1928 |
|   |             |             |             | 797.0638 |
|   |             |             |             | 797.5640 |
|   |             |             |             | 807.4726 |
|   |             |             |             | 809.8461 |
|   |             |             |             | 841.2288 |

|  |  |                                                                                                                                                                                                                                                                                                                                                                                                                                                                                                                                                                                                                                                              |
|--|--|--------------------------------------------------------------------------------------------------------------------------------------------------------------------------------------------------------------------------------------------------------------------------------------------------------------------------------------------------------------------------------------------------------------------------------------------------------------------------------------------------------------------------------------------------------------------------------------------------------------------------------------------------------------|
|  |  | 844.8019<br>904.1942<br>911.6498<br>932.4038<br>940.0085<br>947.1674<br>948.2094<br>948.9062<br>973.3315<br>974.6811<br>1076.2475<br>1080.9455<br>1087.7570<br>1089.0189<br>1097.1893<br>1107.5712<br>1107.8118<br>1110.8703<br>1120.2856<br>1122.6319<br>1173.8485<br>1181.7966<br>1190.4928<br>1202.6429<br>1204.6348<br>1213.2223<br>1216.1694<br>1221.1254<br>1226.4167<br>1231.1404<br>1232.4167<br>1257.7418<br>1259.9042<br>1266.3634<br>1268.7373<br>1269.0038<br>1273.9132<br>1294.7936<br>1298.6236<br>1302.0795<br>1304.2308<br>1307.9364<br>1310.9089<br>1322.1517<br>1331.2862<br>1331.9703<br>1334.8706<br>1337.2163<br>1351.0862<br>1353.3342 |
|--|--|--------------------------------------------------------------------------------------------------------------------------------------------------------------------------------------------------------------------------------------------------------------------------------------------------------------------------------------------------------------------------------------------------------------------------------------------------------------------------------------------------------------------------------------------------------------------------------------------------------------------------------------------------------------|

|  |  |                                                                                                                                                                                                                                                                                                                                                                                                                                                                                                                                                                                                                                                                        |
|--|--|------------------------------------------------------------------------------------------------------------------------------------------------------------------------------------------------------------------------------------------------------------------------------------------------------------------------------------------------------------------------------------------------------------------------------------------------------------------------------------------------------------------------------------------------------------------------------------------------------------------------------------------------------------------------|
|  |  | 1354.7245<br>1356.8473<br>1359.2498<br>1362.8821<br>1365.7451<br>1376.5610<br>1377.8487<br>1378.9345<br>1379.9825<br>1382.5006<br>1397.2615<br>1398.7227<br>1398.9241<br>1403.4845<br>1421.1143<br>1425.3266<br>1429.4894<br>1452.7579<br>1452.8553<br>1467.4925<br>1474.6508<br>1481.7966<br>1487.6956<br>1492.2875<br>1498.4671<br>1506.4211<br>1512.1609<br>1514.6418<br>1515.9674<br>1525.3808<br>1532.0916<br>1546.2664<br>1553.2725<br>1556.7410<br>1569.8938<br>1570.3292<br>1576.4647<br>1579.5288<br>1581.9436<br>1590.8646<br>1591.3073<br>1593.2367<br>1631.7823<br>1634.5156<br>1641.3226<br>1646.6319<br>1648.0048<br>1650.8106<br>1652.1707<br>1653.2050 |
|--|--|------------------------------------------------------------------------------------------------------------------------------------------------------------------------------------------------------------------------------------------------------------------------------------------------------------------------------------------------------------------------------------------------------------------------------------------------------------------------------------------------------------------------------------------------------------------------------------------------------------------------------------------------------------------------|

|        |   |             |             |             |                                                                            |
|--------|---|-------------|-------------|-------------|----------------------------------------------------------------------------|
|        |   |             |             |             | 1655.6019<br>1655.7487<br>1657.0338<br>1981.2245<br>3781.5533<br>3792.0143 |
| TS@C70 | C | -3.20001400 | 0.67310300  | -2.29335300 | -1530.5213                                                                 |
|        | C | -2.42849800 | 1.89867800  | -2.32262100 | 85.1197                                                                    |
|        | C | -3.95399800 | 0.34093300  | -1.18072000 | 109.5966                                                                   |
|        | C | -2.43628900 | 2.76802100  | -1.24837000 | 152.6665                                                                   |
|        | C | -1.21319200 | 3.44147800  | -0.82543600 | 170.4388                                                                   |
|        | C | -0.00593300 | 3.26345400  | -1.55532200 | 184.2413                                                                   |
|        | C | 1.19907500  | 3.40412800  | -0.81879900 | 238.3690                                                                   |
|        | C | -3.22446600 | -2.01121200 | -1.35119500 | 240.5846                                                                   |
|        | C | -2.43548700 | -1.65234300 | -2.50882300 | 255.2177                                                                   |
|        | C | -3.96242500 | -1.03015700 | -0.69489100 | 257.9420                                                                   |
|        | C | -2.42372200 | -0.34594100 | -2.96158200 | 268.1106                                                                   |
|        | C | -1.19142900 | 0.26068000  | -3.41606700 | 272.9787                                                                   |
|        | C | 0.00071500  | -0.48984100 | -3.48456400 | 317.1888                                                                   |
|        | C | 1.19629100  | 0.25920500  | -3.41122000 | 325.2873                                                                   |
|        | C | -0.00066700 | 2.32200500  | -2.69504300 | 326.9616                                                                   |
|        | C | -1.19209400 | 1.63736400  | -3.02846800 | 328.0280                                                                   |
|        | C | 1.19392800  | 1.63125400  | -3.02097500 | 342.9725                                                                   |
|        | C | -3.23058200 | -1.92310100 | 1.47200500  | 345.8311                                                                   |
|        | C | -2.46897500 | -2.95436600 | 0.78582600  | 346.5642                                                                   |
|        | C | -3.96457200 | -0.98256300 | 0.75126900  | 357.2724                                                                   |
|        | C | -2.46027800 | -2.99211000 | -0.60188100 | 368.7954                                                                   |
|        | C | -1.21477300 | -3.24833900 | -1.31765700 | 372.4890                                                                   |
|        | C | -0.00619000 | -3.53465400 | -0.62752600 | 395.6426                                                                   |
|        | C | 1.20296100  | -3.21184500 | -1.30010100 | 397.1610                                                                   |
|        | C | -0.00294700 | -1.87616400 | -2.99577600 | 412.0447                                                                   |
|        | C | -1.20547600 | -2.42110200 | -2.48452500 | 418.3831                                                                   |
|        | C | 1.20176900  | -2.39974500 | -2.46856400 | 425.1012                                                                   |
|        | C | -3.20682300 | 0.82183700  | 2.24374200  | 428.3056                                                                   |
|        | C | -2.43025000 | -0.15090900 | 2.97432200  | 437.5113                                                                   |
|        | C | -3.95506000 | 0.41508200  | 1.14966200  | 442.6738                                                                   |
|        | C | -2.44501900 | -1.48659500 | 2.60673300  | 444.6035                                                                   |
|        | C | -1.21079900 | -2.25162900 | 2.63302900  | 448.8143                                                                   |
|        | C | -0.00621500 | -1.67598600 | 3.11400700  | 453.5831                                                                   |
|        | C | 1.19720800  | -2.23524300 | 2.62053500  | 464.8259                                                                   |
|        | C | -0.00519600 | -3.48641200 | 0.84517500  | 470.0404                                                                   |
|        | C | -1.21836600 | -3.15691900 | 1.51760100  | 478.5318                                                                   |
|        | C | 1.20047300  | -3.12097900 | 1.50328000  | 498.1836                                                                   |
|        | C | -3.21111300 | 2.41868700  | -0.07847600 | 501.3504                                                                   |
|        | C | -2.43859600 | 2.84393800  | 1.06998200  | 512.3694                                                                   |
|        | C | -3.95112200 | 1.23722800  | -0.04312200 | 521.1525                                                                   |
|        | C | -2.43584100 | 2.04817000  | 2.19961400  | 523.8008                                                                   |
|        | C | -1.19925700 | 1.83316500  | 2.92269400  | 527.7342                                                                   |
|        | C | -0.00599200 | 2.49491100  | 2.54876800  | 528.6725                                                                   |

|   |             |             |             |          |
|---|-------------|-------------|-------------|----------|
| C | 1.18878300  | 1.82473600  | 2.91761500  | 530.8652 |
| C | -0.00573400 | -0.26084600 | 3.51428100  | 536.9944 |
| C | -1.19905400 | 0.48336700  | 3.39583000  | 539.9179 |
| C | 1.19040900  | 0.48043100  | 3.39341500  | 541.3371 |
| C | -0.00840400 | 3.36246500  | 1.35166700  | 545.9392 |
| C | -1.21510200 | 3.49142200  | 0.60905400  | 549.1376 |
| C | 1.19792100  | 3.45193100  | 0.60830500  | 550.4164 |
| C | 3.21144800  | 0.81704800  | 2.25372700  | 554.3849 |
| C | 2.43128800  | 2.03474100  | 2.20293800  | 555.2383 |
| C | 2.42673800  | 2.81717900  | 1.06969800  | 562.4297 |
| C | 3.96472200  | 0.41269400  | 1.16039400  | 563.8579 |
| C | 3.22746100  | -1.91185200 | 1.47694300  | 564.8849 |
| C | 2.43703100  | -1.47937300 | 2.60594600  | 566.0110 |
| C | 2.42847900  | -0.15124100 | 2.98136200  | 573.4174 |
| C | 3.97923700  | -0.98400600 | 0.76132400  | 585.4951 |
| C | 3.23197400  | -2.00299800 | -1.34565900 | 588.0670 |
| C | 2.44948300  | -2.96211000 | -0.59237100 | 590.2799 |
| C | 2.44932400  | -2.91882200 | 0.78531100  | 596.5160 |
| C | 3.98120400  | -1.03108000 | -0.68883800 | 599.5305 |
| C | 3.21633200  | 0.67056900  | -2.29340400 | 621.1489 |
| C | 2.43546700  | -0.34307300 | -2.96092600 | 640.0772 |
| C | 2.44209400  | -1.64405800 | -2.50132600 | 641.7984 |
| C | 3.96886300  | 0.33829100  | -1.17619000 | 642.3769 |
| C | 3.20648100  | 2.40144100  | -0.07253800 | 651.4853 |
| C | 2.42925000  | 2.74353600  | -1.23954200 | 652.1164 |
| C | 2.43450900  | 1.88832300  | -2.31944700 | 652.7093 |
| C | 3.95812600  | 1.23000000  | -0.03519100 | 677.5439 |
| C | 0.28753300  | 0.06925100  | -0.03676600 | 678.0358 |
| O | 1.39195500  | -0.36333100 | -0.01507600 | 686.0803 |
| O | -0.32165100 | 1.16111700  | -0.00767300 | 688.2959 |
| H | -1.30894200 | 0.28094200  | 0.03393900  | 689.1305 |
| O | -0.93444900 | -0.80643100 | -0.09960700 | 691.7282 |
| H | -0.95764800 | -1.43057200 | 0.65225500  | 712.5976 |
|   |             |             |             | 715.1145 |
|   |             |             |             | 723.6666 |
|   |             |             |             | 725.2008 |
|   |             |             |             | 726.0660 |
|   |             |             |             | 727.3025 |
|   |             |             |             | 734.9934 |
|   |             |             |             | 737.3820 |
|   |             |             |             | 737.6050 |
|   |             |             |             | 738.2635 |
|   |             |             |             | 740.1591 |
|   |             |             |             | 743.1720 |
|   |             |             |             | 744.2831 |
|   |             |             |             | 746.0008 |
|   |             |             |             | 749.0587 |
|   |             |             |             | 751.2028 |
|   |             |             |             | 754.0612 |
|   |             |             |             | 755.0719 |

|  |  |                                                                                                                                                                                                                                                                                                                                                                                                                                                                                                                                                                                                                                      |
|--|--|--------------------------------------------------------------------------------------------------------------------------------------------------------------------------------------------------------------------------------------------------------------------------------------------------------------------------------------------------------------------------------------------------------------------------------------------------------------------------------------------------------------------------------------------------------------------------------------------------------------------------------------|
|  |  | 756.7174<br>757.0524<br>758.3988<br>760.1176<br>762.8663<br>764.0652<br>764.3024<br>766.4965<br>768.1042<br>771.1034<br>773.1402<br>776.0658<br>778.5911<br>781.5397<br>782.5858<br>788.1147<br>794.9142<br>796.7495<br>797.5773<br>807.1144<br>809.1667<br>813.2856<br>840.9576<br>843.8508<br>903.1988<br>909.4377<br>928.5757<br>932.2983<br>938.5339<br>945.1067<br>946.0448<br>947.6187<br>971.8651<br>973.0613<br>1074.2582<br>1077.3906<br>1084.5645<br>1086.2338<br>1089.0078<br>1095.8256<br>1105.2520<br>1107.9589<br>1119.1131<br>1119.7717<br>1171.2570<br>1180.6938<br>1187.5346<br>1197.9991<br>1201.5024<br>1209.1214 |
|--|--|--------------------------------------------------------------------------------------------------------------------------------------------------------------------------------------------------------------------------------------------------------------------------------------------------------------------------------------------------------------------------------------------------------------------------------------------------------------------------------------------------------------------------------------------------------------------------------------------------------------------------------------|

|  |  |                                                                                                                                                                                                                                                                                                                                                                                                                                                                                                                                                                                                                                                                        |
|--|--|------------------------------------------------------------------------------------------------------------------------------------------------------------------------------------------------------------------------------------------------------------------------------------------------------------------------------------------------------------------------------------------------------------------------------------------------------------------------------------------------------------------------------------------------------------------------------------------------------------------------------------------------------------------------|
|  |  | 1213.5022<br>1218.3557<br>1227.2953<br>1227.8586<br>1231.0745<br>1255.9851<br>1262.3068<br>1263.8589<br>1266.2013<br>1270.3966<br>1293.9652<br>1295.4986<br>1300.5927<br>1301.1104<br>1304.5945<br>1307.8950<br>1308.9213<br>1329.5550<br>1330.5500<br>1334.3077<br>1334.6810<br>1350.0353<br>1351.5961<br>1352.6171<br>1353.8763<br>1355.5589<br>1360.6952<br>1364.1265<br>1371.6701<br>1373.2863<br>1378.1070<br>1378.8714<br>1379.8882<br>1392.5605<br>1396.3569<br>1398.4867<br>1403.9857<br>1406.9341<br>1418.0807<br>1421.8838<br>1423.2092<br>1447.2531<br>1452.2804<br>1461.2603<br>1471.5224<br>1479.7861<br>1492.0975<br>1492.9773<br>1496.0709<br>1502.2714 |
|--|--|------------------------------------------------------------------------------------------------------------------------------------------------------------------------------------------------------------------------------------------------------------------------------------------------------------------------------------------------------------------------------------------------------------------------------------------------------------------------------------------------------------------------------------------------------------------------------------------------------------------------------------------------------------------------|

|        |   |             |             |             |                                                                                                                                                                                                                                                                                                                                                                                       |
|--------|---|-------------|-------------|-------------|---------------------------------------------------------------------------------------------------------------------------------------------------------------------------------------------------------------------------------------------------------------------------------------------------------------------------------------------------------------------------------------|
|        |   |             |             |             | 1511.8889<br>1515.0688<br>1517.5494<br>1524.3209<br>1532.4242<br>1545.6158<br>1555.1032<br>1567.5870<br>1569.5076<br>1573.3292<br>1579.6604<br>1582.6816<br>1590.1026<br>1591.1779<br>1591.6061<br>1627.7376<br>1633.7728<br>1644.8814<br>1647.0043<br>1652.2968<br>1654.7769<br>1656.1474<br>1657.4706<br>1658.7348<br>1659.9121<br>1663.5505<br>2055.0211<br>2290.1832<br>3599.0608 |
| CW@C70 | C | -3.20089800 | 1.96424700  | -1.42225300 | 33.0125                                                                                                                                                                                                                                                                                                                                                                               |
|        | C | -2.44768900 | 2.99288300  | -0.72125100 | 50.8491                                                                                                                                                                                                                                                                                                                                                                               |
|        | C | -3.93583000 | 1.00287700  | -0.73505100 | 131.7367                                                                                                                                                                                                                                                                                                                                                                              |
|        | C | -2.45097100 | 3.00605600  | 0.66537500  | 171.7299                                                                                                                                                                                                                                                                                                                                                                              |
|        | C | -1.20720700 | 3.25302800  | 1.39557400  | 189.3298                                                                                                                                                                                                                                                                                                                                                                              |
|        | C | 0.00368600  | 3.56482600  | 0.71155400  | 197.7993                                                                                                                                                                                                                                                                                                                                                                              |
|        | C | 1.20782600  | 3.19498000  | 1.37973100  | 224.9143                                                                                                                                                                                                                                                                                                                                                                              |
|        | C | -3.19297100 | -0.76809900 | -2.26462500 | 239.4741                                                                                                                                                                                                                                                                                                                                                                              |
|        | C | -2.40943400 | 0.22832000  | -2.96141100 | 255.0428                                                                                                                                                                                                                                                                                                                                                                              |
|        | C | -3.93969300 | -0.38884800 | -1.16385200 | 262.2860                                                                                                                                                                                                                                                                                                                                                                              |
|        | C | -2.41308700 | 1.55416900  | -2.56071200 | 262.6836                                                                                                                                                                                                                                                                                                                                                                              |
|        | C | -1.18861900 | 2.33211500  | -2.57354800 | 273.9056                                                                                                                                                                                                                                                                                                                                                                              |
|        | C | 0.00907900  | 1.75436400  | -3.06040400 | 315.8820                                                                                                                                                                                                                                                                                                                                                                              |
|        | C | 1.21199200  | 2.29552100  | -2.55474400 | 320.2488                                                                                                                                                                                                                                                                                                                                                                              |
|        | C | 0.00618600  | 3.55032300  | -0.77015700 | 326.6439                                                                                                                                                                                                                                                                                                                                                                              |
|        | C | -1.20244000 | 3.22791700  | -1.45209500 | 331.4103                                                                                                                                                                                                                                                                                                                                                                              |
|        | C | 1.21117100  | 3.16532300  | -1.42693400 | 336.4215                                                                                                                                                                                                                                                                                                                                                                              |
|        | C | -3.23769600 | -2.44625900 | 0.01694400  | 343.2445                                                                                                                                                                                                                                                                                                                                                                              |
|        | C | -2.46141600 | -2.84314800 | -1.14546600 | 348.6997                                                                                                                                                                                                                                                                                                                                                                              |
|        | C | -3.95280900 | -1.24504500 | 0.00587500  | 352.5086                                                                                                                                                                                                                                                                                                                                                                              |



|   |             |             |             |          |
|---|-------------|-------------|-------------|----------|
| C | -2.43585700 | -2.00514800 | -2.25039900 | 357.2475 |
| C | -1.19206700 | -1.76158600 | -2.95688200 | 366.4240 |
| C | 0.00269600  | -2.42033300 | -2.59189500 | 370.0936 |
| C | 1.20482200  | -1.75276600 | -2.94772500 | 379.7424 |
| C | 0.01259900  | 0.34707100  | -3.48781600 | 399.1104 |
| C | -1.18103700 | -0.39866600 | -3.39261200 | 399.6720 |
| C | 1.20894500  | -0.40060700 | -3.39056300 | 417.7864 |
| C | -3.20015800 | -0.72798200 | 2.27026300  | 422.4810 |
| C | -2.44376200 | -1.96449200 | 2.27932900  | 426.4150 |
| C | -3.94325000 | -0.36821700 | 1.16006400  | 437.7681 |
| C | -2.46372500 | -2.82048800 | 1.18809100  | 438.7856 |
| C | -1.22906900 | -3.46975700 | 0.74818000  | 443.8688 |
| C | -0.01662400 | -3.28171100 | 1.47373200  | 453.4922 |
| C | 1.19650200  | -3.39807600 | 0.74273300  | 457.1808 |
| C | -0.01170800 | -3.30395700 | -1.41442800 | 462.2361 |
| C | -1.22631700 | -3.48152600 | -0.68930500 | 466.9358 |
| C | 1.19872000  | -3.40584400 | -0.67948600 | 484.0517 |
| C | -3.20562300 | 1.98943600  | 1.38116800  | 502.0689 |
| C | -2.42153700 | 1.59909200  | 2.52865700  | 505.9803 |
| C | -3.93787100 | 1.01531300  | 0.70793100  | 513.2375 |
| C | -2.42012100 | 0.28032800  | 2.95258400  | 519.0993 |
| C | -1.19282700 | -0.33838500 | 3.39801300  | 522.4217 |
| C | 0.00027800  | 0.40983000  | 3.48663600  | 526.5592 |
| C | 1.19718500  | -0.34115400 | 3.40656500  | 528.2252 |
| C | -0.00678600 | -2.37747500 | 2.63718900  | 529.9449 |
| C | -1.20221200 | -1.70895000 | 2.98464400  | 535.5364 |
| C | 1.19491900  | -1.70420500 | 2.98882400  | 539.8382 |
| C | -0.00106600 | 1.81092700  | 3.03557900  | 543.8510 |
| C | -1.19768700 | 2.37853800  | 2.53417800  | 544.8949 |
| C | 1.20468600  | 2.34619600  | 2.52533200  | 548.5847 |
| C | 3.23333400  | -0.73363200 | 2.29302200  | 549.1296 |
| C | 2.44158600  | 0.26676800  | 2.97512500  | 551.7936 |
| C | 2.44191800  | 1.57855700  | 2.54156700  | 552.1933 |
| C | 3.99481200  | -0.38306000 | 1.17995400  | 556.6329 |
| C | 3.23441200  | -2.42032900 | 0.02420400  | 564.5615 |
| C | 2.44203200  | -2.77641400 | 1.18450300  | 565.3506 |
| C | 2.44596700  | -1.95171300 | 2.29206500  | 567.1645 |
| C | 3.99914800  | -1.25188100 | 0.01419200  | 568.1351 |
| C | 3.24310200  | -0.77349300 | -2.26939900 | 569.4217 |
| C | 2.45126500  | -1.98671900 | -2.24425900 | 573.8185 |
| C | 2.44496400  | -2.79455500 | -1.12938500 | 580.3123 |
| C | 4.00529500  | -0.40441200 | -1.16757000 | 591.9620 |
| C | 3.23794200  | 1.92677200  | -1.41707200 | 594.9374 |
| C | 2.44919300  | 1.52986600  | -2.55749500 | 600.1265 |
| C | 2.45226900  | 0.21426800  | -2.96880400 | 605.9481 |
| C | 3.99963500  | 0.98342300  | -0.73019600 | 621.7948 |
| C | 3.23652800  | 1.95650400  | 1.39572700  | 636.3526 |
| C | 2.45552400  | 2.94092300  | 0.66868600  | 642.8098 |
| C | 2.45419400  | 2.92129900  | -0.70835000 | 643.0687 |
| C | 3.99497000  | 0.99680700  | 0.72109500  | 651.8756 |

|   |             |             |             |          |
|---|-------------|-------------|-------------|----------|
| C | -0.80536600 | 0.04669800  | -0.02437300 | 653.5375 |
| O | -0.93995700 | -1.09565900 | -0.00395500 | 656.4815 |
| O | -0.71510400 | 1.19365600  | -0.00452000 | 678.3793 |
| H | 1.55390900  | 0.73563900  | 0.30258000  | 678.9659 |
| O | 1.46254600  | -0.11344100 | -0.14746000 | 686.4992 |
| H | 1.46252200  | -0.77187700 | 0.55869000  | 689.0203 |
|   |             |             |             | 692.0846 |
|   |             |             |             | 694.1492 |
|   |             |             |             | 716.7094 |
|   |             |             |             | 717.7060 |
|   |             |             |             | 726.6849 |
|   |             |             |             | 729.0026 |
|   |             |             |             | 729.5591 |
|   |             |             |             | 732.8959 |
|   |             |             |             | 738.9804 |
|   |             |             |             | 740.1356 |
|   |             |             |             | 742.8846 |
|   |             |             |             | 743.8581 |
|   |             |             |             | 746.4855 |
|   |             |             |             | 747.2171 |
|   |             |             |             | 747.6423 |
|   |             |             |             | 749.3127 |
|   |             |             |             | 750.7961 |
|   |             |             |             | 755.3058 |
|   |             |             |             | 758.0528 |
|   |             |             |             | 759.6143 |
|   |             |             |             | 759.9019 |
|   |             |             |             | 760.4852 |
|   |             |             |             | 761.3810 |
|   |             |             |             | 763.1585 |
|   |             |             |             | 764.7743 |
|   |             |             |             | 765.1397 |
|   |             |             |             | 768.6337 |
|   |             |             |             | 770.0389 |
|   |             |             |             | 771.0956 |
|   |             |             |             | 773.6036 |
|   |             |             |             | 776.9252 |
|   |             |             |             | 779.3798 |
|   |             |             |             | 781.9375 |
|   |             |             |             | 782.5839 |
|   |             |             |             | 783.0366 |
|   |             |             |             | 785.0856 |
|   |             |             |             | 795.3720 |
|   |             |             |             | 795.8414 |
|   |             |             |             | 798.1043 |
|   |             |             |             | 807.8808 |
|   |             |             |             | 810.0939 |
|   |             |             |             | 840.8344 |
|   |             |             |             | 844.9331 |
|   |             |             |             | 903.7420 |

|  |  |                                                                                                                                                                                                                                                                                                                                                                                                                                                                                                                                                                                                                                                                |
|--|--|----------------------------------------------------------------------------------------------------------------------------------------------------------------------------------------------------------------------------------------------------------------------------------------------------------------------------------------------------------------------------------------------------------------------------------------------------------------------------------------------------------------------------------------------------------------------------------------------------------------------------------------------------------------|
|  |  | 908.5202<br>930.0941<br>938.1917<br>945.3180<br>946.8110<br>947.6608<br>972.7132<br>974.3775<br>1072.1479<br>1078.4052<br>1082.2503<br>1086.1404<br>1096.1798<br>1106.4815<br>1106.7583<br>1119.5919<br>1122.4837<br>1170.8334<br>1175.6864<br>1189.5882<br>1197.5941<br>1199.7568<br>1211.2423<br>1214.7817<br>1218.8138<br>1224.7737<br>1226.7311<br>1238.9893<br>1256.8613<br>1262.8552<br>1263.8341<br>1268.5877<br>1270.7107<br>1291.9559<br>1295.6956<br>1297.2384<br>1302.5617<br>1303.6122<br>1310.7488<br>1327.1112<br>1328.6396<br>1333.2088<br>1335.8974<br>1348.1572<br>1348.4838<br>1350.5804<br>1353.1642<br>1357.8429<br>1360.2361<br>1364.9940 |
|--|--|----------------------------------------------------------------------------------------------------------------------------------------------------------------------------------------------------------------------------------------------------------------------------------------------------------------------------------------------------------------------------------------------------------------------------------------------------------------------------------------------------------------------------------------------------------------------------------------------------------------------------------------------------------------|

|  |  |                                                                                                                                                                                                                                                                                                                                                                                                                                                                                                                                                                                                                                                                        |
|--|--|------------------------------------------------------------------------------------------------------------------------------------------------------------------------------------------------------------------------------------------------------------------------------------------------------------------------------------------------------------------------------------------------------------------------------------------------------------------------------------------------------------------------------------------------------------------------------------------------------------------------------------------------------------------------|
|  |  | 1371.4752<br>1374.8299<br>1376.0574<br>1377.6615<br>1379.9844<br>1393.0430<br>1396.3754<br>1396.4053<br>1401.7685<br>1418.4573<br>1423.2470<br>1425.3548<br>1447.6564<br>1450.1143<br>1461.6616<br>1468.2692<br>1475.2805<br>1482.4718<br>1482.8611<br>1494.8237<br>1501.4104<br>1503.0585<br>1504.0049<br>1507.3467<br>1512.9731<br>1520.8812<br>1531.9623<br>1550.7363<br>1552.1345<br>1562.9777<br>1568.0463<br>1571.3287<br>1575.3688<br>1577.2980<br>1587.8471<br>1588.4612<br>1589.9260<br>1607.4969<br>1624.9682<br>1628.2934<br>1633.6554<br>1641.7241<br>1644.2165<br>1646.0264<br>1648.1541<br>1650.4376<br>1655.2501<br>1656.1551<br>1659.1484<br>2574.0487 |
|--|--|------------------------------------------------------------------------------------------------------------------------------------------------------------------------------------------------------------------------------------------------------------------------------------------------------------------------------------------------------------------------------------------------------------------------------------------------------------------------------------------------------------------------------------------------------------------------------------------------------------------------------------------------------------------------|

|     |   |             |             |             |                        |
|-----|---|-------------|-------------|-------------|------------------------|
|     |   |             |             |             | 3856.6184<br>3948.9306 |
| C84 | C | -2.56428400 | -1.83801000 | -2.78243400 | 212.9633               |
|     | C | -3.21875400 | -2.20802500 | -1.57969800 | 213.5682               |
|     | C | -2.61228700 | -3.25595900 | -0.85969100 | 218.7656               |
|     | C | -1.28536400 | -2.33358900 | -3.12835600 | 224.0351               |
|     | C | -0.60853200 | -3.27845000 | -2.33147000 | 224.2952               |
|     | C | -1.35162800 | -3.79372900 | -1.23675700 | 273.5653               |
|     | C | -3.98483600 | -1.18695000 | -0.84957600 | 277.5176               |
|     | C | -4.07031800 | -1.27403300 | 0.56030700  | 279.5298               |
|     | C | -2.63644100 | -0.47831100 | -3.27629200 | 284.1436               |
|     | C | -3.35227800 | 0.46770100  | -2.60887800 | 285.6901               |
|     | C | -4.06188200 | 0.12219700  | -1.38537700 | 290.6747               |
|     | C | -1.37685100 | -0.12400800 | -3.88077900 | 291.6473               |
|     | C | -0.84467300 | 1.18661800  | -3.74574200 | 331.9411               |
|     | C | 0.55335600  | 1.27780000  | -3.82363800 | 335.7093               |
|     | C | 0.84465900  | -1.18658800 | -3.74575300 | 344.5489               |
|     | C | -0.55337000 | -1.27776900 | -3.82364600 | 348.8357               |
|     | C | 1.37683600  | 0.12404000  | -3.88078100 | 353.3236               |
|     | C | 1.58696700  | -2.19757500 | -2.98435600 | 356.2081               |
|     | C | 1.46080800  | -3.79713900 | -1.12338100 | 362.1995               |
|     | C | 0.85685000  | -3.23732900 | -2.26556000 | 364.9720               |
|     | C | 2.85847900  | -1.82823900 | -2.50595800 | 367.9332               |
|     | C | -3.38327200 | 2.33920300  | -1.28039400 | 370.4046               |
|     | C | -4.07032200 | 1.27403100  | -0.56029500 | 373.6726               |
|     | C | -3.98483300 | 1.18694900  | 0.84959300  | 379.5277               |
|     | C | -4.06187400 | -0.12219200 | 1.38539400  | 380.1063               |
|     | C | -2.69060600 | 3.30098900  | -0.59496400 | 382.5182               |
|     | C | -1.58697800 | 2.19759900  | -2.98433500 | 425.4593               |
|     | C | -2.85848800 | 1.82826000  | -2.50593300 | 438.2759               |
|     | C | -1.46081000 | 3.79714400  | -1.12334500 | 441.5291               |
|     | C | -0.85685800 | 3.23734600  | -2.26553300 | 443.8345               |
|     | C | -2.61228000 | 3.25596200  | 0.85970300  | 453.3263               |
|     | C | -3.21874700 | 2.20802500  | 1.57971100  | 457.3591               |
|     | C | -2.56427400 | 1.83800600  | 2.78244000  | 458.5950               |
|     | C | -2.63642800 | 0.47831500  | 3.27630100  | 462.7587               |
|     | C | -3.35227000 | -0.46770000 | 2.60888900  | 466.4009               |
|     | C | 0.67895800  | 4.20718600  | -0.02435400 | 475.7232               |
|     | C | -0.67895500 | 4.20717900  | 0.02438500  | 485.7504               |
|     | C | -1.35162500 | 3.79372900  | 1.23676200  | 488.0700               |
|     | C | -0.60852300 | 3.27844700  | 2.33147500  | 488.4446               |
|     | C | -1.28534700 | 2.33359000  | 3.12836200  | 492.0591               |
|     | C | 1.28535200  | 2.33361500  | -3.12834300 | 498.7579               |
|     | C | 0.60852400  | 3.27846800  | -2.33144800 | 501.1530               |
|     | C | 1.35162300  | 3.79373900  | -1.23673100 | 508.8203               |
|     | C | -2.69060600 | -3.30098900 | 0.59497200  | 508.8546               |
|     | C | -3.38327000 | -2.33920000 | 1.28040400  | 510.5012               |
|     | C | -2.85848300 | -1.82825900 | 2.50594500  | 511.2274               |
|     | C | -1.37683800 | 0.12400900  | 3.88078600  | 512.3453               |

|   |             |             |             |          |
|---|-------------|-------------|-------------|----------|
| C | 0.55337000  | -1.27779800 | 3.82363300  | 514.6265 |
| C | -0.84466200 | -1.18661600 | 3.74574400  | 520.3398 |
| C | -1.58696900 | -2.19759600 | 2.98433900  | 522.1878 |
| C | -0.85685200 | -3.23734600 | 2.26553400  | 527.4573 |
| C | -1.46080700 | -3.79714400 | 1.12335000  | 528.2679 |
| C | 1.46081400  | 3.79713700  | 1.12337500  | 528.7719 |
| C | 0.85686200  | 3.23732800  | 2.26555900  | 534.9531 |
| C | 1.58697700  | 2.19757600  | 2.98435000  | 538.1622 |
| C | 0.84467200  | 1.18658900  | 3.74575200  | 539.5161 |
| C | -0.55335600 | 1.27777100  | 3.82365200  | 553.2320 |
| C | 1.37685000  | -0.12404000 | 3.88077500  | 578.7965 |
| C | 1.28536200  | -2.33361500 | 3.12833900  | 587.8185 |
| C | 0.60853100  | -3.27846500 | 2.33144400  | 592.1654 |
| C | 1.35162700  | -3.79373700 | 1.23672600  | 596.1568 |
| C | 0.67895600  | -4.20718000 | 0.02435100  | 608.2934 |
| C | -0.67895800 | -4.20718600 | -0.02438500 | 616.7382 |
| C | 3.35227800  | 0.46767700  | 2.60888000  | 617.5269 |
| C | 2.63644200  | -0.47834000 | 3.27628900  | 630.1837 |
| C | 2.56428500  | -1.83803400 | 2.78242000  | 633.4075 |
| C | 3.21875500  | -2.20803900 | 1.57968100  | 637.7190 |
| C | 2.61228600  | -3.25596600 | 0.85966600  | 638.3742 |
| C | 2.69060600  | 3.30098600  | 0.59499000  | 644.6899 |
| C | 3.38327000  | 2.33918900  | 1.28041400  | 655.9376 |
| C | 2.85848900  | 1.82823700  | 2.50594600  | 657.9878 |
| C | 2.56427500  | 1.83803200  | -2.78242900 | 659.1358 |
| C | 3.21874800  | 2.20803800  | -1.57969200 | 664.5401 |
| C | 2.61228400  | 3.25596700  | -0.85967600 | 666.2946 |
| C | 4.06187600  | -0.12218400 | -1.38539200 | 668.2434 |
| C | 3.35226900  | -0.46768000 | -2.60889300 | 672.2487 |
| C | 2.63642800  | 0.47833800  | -3.27629600 | 673.6091 |
| C | 4.07032100  | 1.27402600  | 0.56030400  | 681.7822 |
| C | 3.98483400  | 1.18695600  | -0.84958200 | 688.2234 |
| C | 2.69060700  | -3.30098900 | -0.59500000 | 693.3655 |
| C | 4.06188500  | 0.12218200  | 1.38537900  | 693.9855 |
| C | 3.98483600  | -1.18695800 | 0.84956900  | 694.0331 |
| C | 4.07031900  | -1.27402900 | -0.56031800 | 697.9282 |
| C | 3.38326600  | -2.33919000 | -1.28042300 | 701.0564 |
|   |             |             |             | 702.3303 |
|   |             |             |             | 711.6550 |
|   |             |             |             | 718.5440 |
|   |             |             |             | 719.0390 |
|   |             |             |             | 720.4398 |
|   |             |             |             | 720.5574 |
|   |             |             |             | 726.8644 |
|   |             |             |             | 728.5307 |
|   |             |             |             | 731.3812 |
|   |             |             |             | 735.8577 |
|   |             |             |             | 741.0078 |
|   |             |             |             | 744.5351 |
|   |             |             |             | 746.0069 |

|  |  |                                                                                                                                                                                                                                                                                                                                                                                                                                                                                                                                                                                                                                 |
|--|--|---------------------------------------------------------------------------------------------------------------------------------------------------------------------------------------------------------------------------------------------------------------------------------------------------------------------------------------------------------------------------------------------------------------------------------------------------------------------------------------------------------------------------------------------------------------------------------------------------------------------------------|
|  |  | 749.3242<br>749.4263<br>751.9604<br>753.2697<br>754.9571<br>761.7854<br>762.4155<br>762.6976<br>763.5611<br>766.2783<br>766.7489<br>767.9211<br>768.4190<br>769.5732<br>772.1604<br>772.5151<br>772.8822<br>773.4725<br>773.9112<br>774.5504<br>776.2216<br>776.2631<br>788.1066<br>790.0001<br>808.4786<br>826.3956<br>835.6551<br>839.6662<br>846.8635<br>860.7585<br>872.4976<br>878.0649<br>879.0844<br>887.9450<br>895.5968<br>916.9171<br>917.8758<br>924.0819<br>947.7718<br>1034.7989<br>1036.0441<br>1036.3506<br>1043.7213<br>1044.5770<br>1046.1694<br>1054.4923<br>1064.2739<br>1067.9219<br>1144.7157<br>1147.8946 |
|--|--|---------------------------------------------------------------------------------------------------------------------------------------------------------------------------------------------------------------------------------------------------------------------------------------------------------------------------------------------------------------------------------------------------------------------------------------------------------------------------------------------------------------------------------------------------------------------------------------------------------------------------------|

|  |  |                                                                                                                                                                                                                                                                                                                                                                                                                                                                                                                                                                                                                                                                        |
|--|--|------------------------------------------------------------------------------------------------------------------------------------------------------------------------------------------------------------------------------------------------------------------------------------------------------------------------------------------------------------------------------------------------------------------------------------------------------------------------------------------------------------------------------------------------------------------------------------------------------------------------------------------------------------------------|
|  |  | 1148.5078<br>1155.1934<br>1156.7739<br>1175.2034<br>1181.6206<br>1184.9780<br>1198.2345<br>1198.8630<br>1200.7278<br>1208.2772<br>1218.0898<br>1239.8275<br>1245.8737<br>1250.1910<br>1250.5205<br>1260.3841<br>1267.6211<br>1278.1341<br>1279.8436<br>1282.7980<br>1283.6404<br>1290.0325<br>1291.3338<br>1292.4526<br>1297.7712<br>1303.9405<br>1305.4985<br>1317.8727<br>1320.8301<br>1324.8619<br>1340.7587<br>1349.0869<br>1352.5637<br>1353.7592<br>1360.7478<br>1363.8757<br>1370.6669<br>1373.5438<br>1374.2555<br>1375.2790<br>1378.3686<br>1385.4455<br>1385.6683<br>1389.9409<br>1394.9506<br>1395.0675<br>1398.7216<br>1400.5480<br>1402.9926<br>1403.2950 |
|--|--|------------------------------------------------------------------------------------------------------------------------------------------------------------------------------------------------------------------------------------------------------------------------------------------------------------------------------------------------------------------------------------------------------------------------------------------------------------------------------------------------------------------------------------------------------------------------------------------------------------------------------------------------------------------------|



|  |  |                                                                                                                                                                                                                                                                                                                                                                                                                                                                                                                                                                                                                                                           |
|--|--|-----------------------------------------------------------------------------------------------------------------------------------------------------------------------------------------------------------------------------------------------------------------------------------------------------------------------------------------------------------------------------------------------------------------------------------------------------------------------------------------------------------------------------------------------------------------------------------------------------------------------------------------------------------|
|  |  | 1405.1923<br>1406.3329<br>1414.8900<br>1422.1391<br>1426.7352<br>1434.3869<br>1434.6676<br>1437.9376<br>1440.4061<br>1447.6326<br>1455.6214<br>1465.1375<br>1479.1138<br>1481.5096<br>1490.2069<br>1491.8307<br>1493.3498<br>1493.4822<br>1506.8216<br>1524.3569<br>1539.2129<br>1541.0288<br>1544.7553<br>1549.7223<br>1562.2180<br>1563.1565<br>1567.3694<br>1586.2714<br>1592.7747<br>1597.0020<br>1597.8727<br>1601.2508<br>1607.1168<br>1612.0625<br>1613.7852<br>1622.6457<br>1625.5787<br>1631.8747<br>1639.4700<br>1668.1074<br>1676.3287<br>1676.7498<br>1677.6891<br>1703.4426<br>1705.0902<br>1710.2603<br>1714.4218<br>1723.8801<br>1726.7391 |
|--|--|-----------------------------------------------------------------------------------------------------------------------------------------------------------------------------------------------------------------------------------------------------------------------------------------------------------------------------------------------------------------------------------------------------------------------------------------------------------------------------------------------------------------------------------------------------------------------------------------------------------------------------------------------------------|

|        |   |             |             |             |          |
|--------|---|-------------|-------------|-------------|----------|
| CA@C84 | C | -2.51255500 | -1.81397900 | -2.83169000 | 44.8330  |
|        | C | -3.19139200 | -2.18945800 | -1.64609200 | 54.0708  |
|        | C | -2.60803100 | -3.24771000 | -0.92123800 | 87.7290  |
|        | C | -1.23013400 | -2.31392900 | -3.15280500 | 97.0001  |
|        | C | -0.57644000 | -3.26801400 | -2.34979600 | 111.6149 |
|        | C | -1.34470600 | -3.79184600 | -1.27587400 | 119.0174 |
|        | C | -3.96269800 | -1.16607400 | -0.92823400 | 214.8142 |
|        | C | -4.07578800 | -1.26006000 | 0.47841700  | 217.1471 |
|        | C | -2.56742200 | -0.45020400 | -3.31608900 | 220.7096 |
|        | C | -3.29416600 | 0.49767200  | -2.66343300 | 228.8448 |
|        | C | -4.02540000 | 0.14763800  | -1.45658400 | 229.4704 |
|        | C | -1.29572500 | -0.09760800 | -3.89309600 | 276.0912 |
|        | C | -0.76259500 | 1.20904300  | -3.73973200 | 279.4100 |
|        | C | 0.63761500  | 1.29367000  | -3.79156000 | 281.7737 |
|        | C | 0.91652600  | -1.17008300 | -3.71758500 | 289.3844 |
|        | C | -0.47867300 | -1.25526100 | -3.82262100 | 290.2205 |
|        | C | 1.45736500  | 0.13808800  | -3.83804700 | 294.7778 |
|        | C | 1.63669100  | -2.18697300 | -2.94920700 | 297.5525 |
|        | C | 1.46361600  | -3.79412100 | -1.10491400 | 331.8211 |
|        | C | 0.88600800  | -3.22748500 | -2.25395000 | 336.2474 |
|        | C | 2.90122800  | -1.82593500 | -2.44836100 | 345.1226 |
|        | C | -3.34763200 | 2.36612800  | -1.32720300 | 349.4718 |
|        | C | -4.05101000 | 1.29849800  | -0.62711100 | 357.0823 |
|        | C | -3.99600300 | 1.20404700  | 0.78584800  | 358.1671 |
|        | C | -4.08225100 | -0.11205900 | 1.30980200  | 362.7229 |
|        | C | -2.66731900 | 3.32538400  | -0.62334300 | 366.5499 |
|        | C | -1.51600400 | 2.22105300  | -2.99267200 | 370.9934 |
|        | C | -2.79856200 | 1.85533300  | -2.54285800 | 373.7570 |
|        | C | -1.42358900 | 3.81570900  | -1.12447900 | 377.0601 |
|        | C | -0.79840200 | 3.25493400  | -2.25551900 | 381.1510 |
|        | C | -2.61966400 | 3.27444200  | 0.83352900  | 384.3030 |
|        | C | -3.24444900 | 2.22350900  | 1.53744900  | 387.5644 |
|        | C | -2.61096400 | 1.83698400  | 2.74818200  | 428.2805 |
|        | C | -2.69655200 | 0.47364100  | 3.23077400  | 439.5425 |
|        | C | -3.39862000 | -0.46858300 | 2.54335000  | 442.5184 |
|        | C | 0.69688600  | 4.20142800  | 0.01859700  | 444.9572 |
|        | C | -0.66233800 | 4.21265800  | 0.04040500  | 455.4292 |
|        | C | -1.36118600 | 3.80145600  | 1.23760000  | 458.2227 |
|        | C | -0.64071400 | 3.27171200  | 2.34092000  | 459.1242 |
|        | C | -1.33536700 | 2.32338500  | 3.11878300  | 467.1552 |
|        | C | 1.35946200  | 2.34127500  | -3.07929300 | 468.3936 |
|        | C | 0.66777100  | 3.28499900  | -2.29145200 | 477.2553 |
|        | C | 1.39189100  | 3.79117600  | -1.18085600 | 485.9315 |
|        | C | -2.71482600 | -3.29898700 | 0.53079500  | 488.0002 |
|        | C | -3.41391500 | -2.33503700 | 1.20620100  | 490.2693 |
|        | C | -2.91209500 | -1.83158800 | 2.44258000  | 491.2200 |
|        | C | -1.45024100 | 0.10963800  | 3.85413700  | 493.4965 |
|        | C | 0.47173000  | -1.30066500 | 3.82637200  | 501.0042 |
|        | C | -0.92315300 | -1.20391700 | 3.72088300  | 503.6175 |
|        | C | -1.65286900 | -2.20997700 | 2.94309500  | 508.7670 |

|   |             |             |             |          |
|---|-------------|-------------|-------------|----------|
| C | -0.91672100 | -3.25320700 | 2.23716400  | 510.7814 |
| C | -1.50060600 | -3.80764100 | 1.08219000  | 511.0094 |
| C | 1.45518300  | 3.78195900  | 1.17687000  | 512.0535 |
| C | 0.82463700  | 3.21877900  | 2.30253500  | 512.7219 |
| C | 1.53708700  | 2.17196200  | 3.02770300  | 515.4198 |
| C | 0.77660000  | 1.16156300  | 3.76829200  | 520.1585 |
| C | -0.62196600 | 1.26011900  | 3.81976000  | 523.2607 |
| C | 1.29897100  | -0.15081400 | 3.90782600  | 527.7557 |
| C | 1.21205900  | -2.35691500 | 3.14274000  | 528.7119 |
| C | 0.54585500  | -3.29520100 | 2.32952600  | 529.9003 |
| C | 1.30797200  | -3.80531200 | 1.24739400  | 535.6363 |
| C | 0.65777800  | -4.21243300 | 0.02224600  | 539.6896 |
| C | -0.69822500 | -4.21478500 | -0.05234100 | 539.8603 |
| C | 3.30336700  | 0.43753000  | 2.67994600  | 554.6979 |
| C | 2.56794900  | -0.50791400 | 3.32606800  | 564.1122 |
| C | 2.49924200  | -1.86426900 | 2.82589200  | 579.1453 |
| C | 3.17549000  | -2.22801100 | 1.63457400  | 586.2022 |
| C | 2.57663900  | -3.26799600 | 0.89891600  | 591.8267 |
| C | 2.69557000  | 3.28563700  | 0.67177300  | 595.4499 |
| C | 3.37138100  | 2.31506600  | 1.36294600  | 608.3946 |
| C | 2.81680100  | 1.79920000  | 2.57337800  | 614.6095 |
| C | 2.63401300  | 1.84066600  | -2.71669200 | 617.8976 |
| C | 3.27218900  | 2.20418900  | -1.50074100 | 618.1397 |
| C | 2.64765700  | 3.24803300  | -0.78447000 | 627.2018 |
| C | 4.10052000  | -0.13344800 | -1.30192000 | 630.2705 |
| C | 3.40637500  | -0.46897000 | -2.53703700 | 634.5363 |
| C | 2.70991600  | 0.48378900  | -3.21569900 | 638.0358 |
| C | 4.07353900  | 1.25351800  | 0.65198500  | 639.4788 |
| C | 4.02323900  | 1.17493000  | -0.76154500 | 644.6228 |
| C | 2.68402400  | -3.30425700 | -0.55167900 | 655.4806 |
| C | 4.03675600  | 0.09669700  | 1.47047400  | 656.5586 |
| C | 3.96266700  | -1.20844800 | 0.92690500  | 658.5965 |
| C | 4.07906000  | -1.28801800 | -0.48077200 | 662.4222 |
| C | 3.39800000  | -2.34487300 | -1.21717200 | 667.4246 |
| C | -0.05296400 | -0.13138200 | -0.10056100 | 667.6272 |
| O | -0.50120100 | -1.24130100 | 0.00622900  | 670.2416 |
| O | 1.22715600  | 0.12753700  | -0.36211100 | 674.0913 |
| H | 1.36578900  | 1.08849300  | -0.41491200 | 682.7146 |
| O | -0.76386600 | 1.00136700  | 0.02846500  | 687.7673 |
| H | -1.68284500 | 0.74853100  | 0.22324800  | 691.6331 |
|   |             |             |             | 694.7324 |
|   |             |             |             | 696.2127 |
|   |             |             |             | 696.2754 |
|   |             |             |             | 701.4963 |
|   |             |             |             | 702.1054 |
|   |             |             |             | 711.3476 |
|   |             |             |             | 716.0188 |
|   |             |             |             | 717.3993 |
|   |             |             |             | 719.7643 |
|   |             |             |             | 720.2869 |

|  |  |                                                                                                                                                                                                                                                                                                                                                                                                                                                                                                                                                                                                                         |
|--|--|-------------------------------------------------------------------------------------------------------------------------------------------------------------------------------------------------------------------------------------------------------------------------------------------------------------------------------------------------------------------------------------------------------------------------------------------------------------------------------------------------------------------------------------------------------------------------------------------------------------------------|
|  |  | 725.3962<br>726.5330<br>729.3048<br>733.6904<br>739.5235<br>741.3001<br>743.5228<br>746.7307<br>748.5229<br>749.2599<br>749.7316<br>751.5488<br>756.0714<br>757.7054<br>759.9968<br>760.9418<br>763.0111<br>763.6579<br>764.2145<br>764.6151<br>765.4446<br>766.3996<br>768.2095<br>768.6828<br>770.4009<br>772.3873<br>773.4619<br>773.8438<br>776.0683<br>782.5636<br>787.5169<br>789.4904<br>808.8149<br>825.9344<br>835.5446<br>839.9013<br>849.1956<br>863.6484<br>873.7212<br>880.2475<br>881.3595<br>891.1874<br>895.7971<br>918.2541<br>918.8669<br>924.0648<br>947.5447<br>1034.7922<br>1038.2697<br>1038.7805 |
|--|--|-------------------------------------------------------------------------------------------------------------------------------------------------------------------------------------------------------------------------------------------------------------------------------------------------------------------------------------------------------------------------------------------------------------------------------------------------------------------------------------------------------------------------------------------------------------------------------------------------------------------------|

|  |  |                                                                                                                                                                                                                                                                                                                                                                                                                                                                                                                                                                                                                                                                        |
|--|--|------------------------------------------------------------------------------------------------------------------------------------------------------------------------------------------------------------------------------------------------------------------------------------------------------------------------------------------------------------------------------------------------------------------------------------------------------------------------------------------------------------------------------------------------------------------------------------------------------------------------------------------------------------------------|
|  |  | 1039.5670<br>1045.8854<br>1048.0316<br>1048.8313<br>1058.0215<br>1067.6808<br>1069.5710<br>1148.1517<br>1152.5768<br>1153.2682<br>1157.4134<br>1159.3072<br>1178.7992<br>1184.4814<br>1188.2101<br>1197.0595<br>1201.4292<br>1203.1103<br>1204.4292<br>1213.8091<br>1223.2620<br>1245.3968<br>1248.8552<br>1252.4812<br>1253.9953<br>1262.5974<br>1269.0494<br>1269.8115<br>1281.9804<br>1283.5693<br>1286.2010<br>1287.6096<br>1292.2500<br>1297.6144<br>1298.6465<br>1301.3934<br>1305.1576<br>1310.0484<br>1323.6921<br>1324.6723<br>1330.3288<br>1342.4121<br>1353.1131<br>1356.4498<br>1357.2171<br>1365.4939<br>1366.4236<br>1373.3287<br>1376.7784<br>1377.1572 |
|--|--|------------------------------------------------------------------------------------------------------------------------------------------------------------------------------------------------------------------------------------------------------------------------------------------------------------------------------------------------------------------------------------------------------------------------------------------------------------------------------------------------------------------------------------------------------------------------------------------------------------------------------------------------------------------------|

|  |  |                                                                                                                                                                                                                                                                                                                                                                                                                                                                                                                                                                                                                                                                        |
|--|--|------------------------------------------------------------------------------------------------------------------------------------------------------------------------------------------------------------------------------------------------------------------------------------------------------------------------------------------------------------------------------------------------------------------------------------------------------------------------------------------------------------------------------------------------------------------------------------------------------------------------------------------------------------------------|
|  |  | 1377.4299<br>1380.7849<br>1388.9901<br>1390.5668<br>1394.1259<br>1395.6759<br>1399.2029<br>1402.2608<br>1404.9047<br>1406.4329<br>1408.6560<br>1409.4468<br>1410.9554<br>1418.1872<br>1423.8762<br>1429.4193<br>1437.5567<br>1438.0097<br>1440.5796<br>1444.5990<br>1449.4720<br>1458.1449<br>1460.9010<br>1469.4767<br>1481.9291<br>1485.8075<br>1492.8769<br>1494.4487<br>1496.1858<br>1498.9200<br>1511.4715<br>1526.2419<br>1541.1976<br>1542.5531<br>1546.6381<br>1553.8950<br>1564.0492<br>1565.1148<br>1568.2475<br>1584.1871<br>1593.0931<br>1596.2508<br>1597.9724<br>1601.1444<br>1608.6177<br>1611.3131<br>1615.3680<br>1621.8742<br>1627.0587<br>1631.2456 |
|--|--|------------------------------------------------------------------------------------------------------------------------------------------------------------------------------------------------------------------------------------------------------------------------------------------------------------------------------------------------------------------------------------------------------------------------------------------------------------------------------------------------------------------------------------------------------------------------------------------------------------------------------------------------------------------------|

|        |   |             |             |             |                                                                                                                                                                                    |
|--------|---|-------------|-------------|-------------|------------------------------------------------------------------------------------------------------------------------------------------------------------------------------------|
|        |   |             |             |             | 1638.8888<br>1664.9339<br>1673.0993<br>1674.0720<br>1675.3621<br>1702.9223<br>1704.3897<br>1709.5592<br>1713.0940<br>1719.7178<br>1725.3344<br>1931.3055<br>3778.8740<br>3786.0686 |
| TS@C84 | C | 2.56852300  | 1.91329400  | -2.72728600 | -1645.7047                                                                                                                                                                         |
|        | C | 3.19021600  | 2.30552000  | -1.51693600 | 34.6886                                                                                                                                                                            |
|        | C | 2.52971100  | 3.33308700  | -0.81294900 | 79.0003                                                                                                                                                                            |
|        | C | 1.27916700  | 2.36673700  | -3.09431000 | 98.9400                                                                                                                                                                            |
|        | C | 0.55308200  | 3.29254500  | -2.31779800 | 112.2136                                                                                                                                                                           |
|        | C | 1.25827100  | 3.83074200  | -1.21187300 | 114.4232                                                                                                                                                                           |
|        | C | 3.98948700  | 1.31285800  | -0.77802900 | 133.7465                                                                                                                                                                           |
|        | C | 4.04047500  | 1.40598000  | 0.63504100  | 213.7880                                                                                                                                                                           |
|        | C | 2.69871100  | 0.55724600  | -3.21516000 | 217.8674                                                                                                                                                                           |
|        | C | 3.44455200  | -0.36283100 | -2.54347700 | 220.6775                                                                                                                                                                           |
|        | C | 4.13162800  | 0.00558000  | -1.31213300 | 228.8478                                                                                                                                                                           |
|        | C | 1.46113700  | 0.16347800  | -3.83898300 | 230.1898                                                                                                                                                                           |
|        | C | 0.97052300  | -1.16020900 | -3.71091500 | 275.2127                                                                                                                                                                           |
|        | C | -0.42288300 | -1.29678600 | -3.81552400 | 279.0253                                                                                                                                                                           |
|        | C | -0.79713300 | 1.15497800  | -3.74833300 | 281.3730                                                                                                                                                                           |
|        | C | 0.59784600  | 1.28830500  | -3.79977600 | 290.1199                                                                                                                                                                           |
|        | C | -1.28190500 | -0.17236400 | -3.89167400 | 290.9403                                                                                                                                                                           |
|        | C | -1.58798700 | 2.14488700  | -3.00825800 | 293.7968                                                                                                                                                                           |
|        | C | -1.56061500 | 3.76397500  | -1.15737600 | 299.2416                                                                                                                                                                           |
|        | C | -0.91174700 | 3.21414700  | -2.28226100 | 332.2435                                                                                                                                                                           |
|        | C | -2.85477000 | 1.73361900  | -2.55341500 | 336.4186                                                                                                                                                                           |
|        | C | 3.51521200  | -2.23103900 | -1.21303600 | 344.9266                                                                                                                                                                           |
|        | C | 4.16750200  | -1.14695300 | -0.48365900 | 348.7841                                                                                                                                                                           |
|        | C | 4.04487000  | -1.05984400 | 0.92809300  | 356.5729                                                                                                                                                                           |
|        | C | 4.05697600  | 0.25411900  | 1.46440800  | 357.9223                                                                                                                                                                           |
|        | C | 2.82956400  | -3.20885500 | -0.53873700 | 362.7511                                                                                                                                                                           |
|        | C | 1.73444800  | -2.14237200 | -2.93921200 | 365.9000                                                                                                                                                                           |
|        | C | 2.99095400  | -1.73639300 | -2.44557200 | 370.4110                                                                                                                                                                           |
|        | C | 1.62035300  | -3.73936400 | -1.08457700 | 373.5027                                                                                                                                                                           |
|        | C | 1.01851700  | -3.19956100 | -2.23460800 | 378.8443                                                                                                                                                                           |
|        | C | 2.71853600  | -3.16422500 | 0.91369800  | 381.2804                                                                                                                                                                           |
|        | C | 3.28515300  | -2.09986300 | 1.64510000  | 384.8665                                                                                                                                                                           |
|        | C | 2.58417800  | -1.74851100 | 2.83113200  | 386.5676                                                                                                                                                                           |
|        | C | 2.59958300  | -0.38813500 | 3.32400100  | 427.0344                                                                                                                                                                           |
|        | C | 3.30082200  | 0.57792300  | 2.66862200  | 439.0165                                                                                                                                                                           |

|   |             |             |             |          |
|---|-------------|-------------|-------------|----------|
| C | -0.53188200 | -4.22108700 | -0.02778700 | 441.9822 |
| C | 0.82565800  | -4.17300600 | 0.04438400  | 445.7268 |
| C | 1.46193300  | -3.73788500 | 1.26576800  | 456.1843 |
| C | 0.67775600  | -3.24898500 | 2.34292000  | 458.3565 |
| C | 1.31154300  | -2.28274000 | 3.14980900  | 458.9978 |
| C | -1.13618200 | -2.37440900 | -3.13719100 | 464.2769 |
| C | -0.44420400 | -3.29336500 | -2.32636600 | 467.7633 |
| C | -1.19682900 | -3.83789200 | -1.25191200 | 468.5286 |
| C | 2.57695300  | 3.38211700  | 0.63983700  | 477.6528 |
| C | 3.29470900  | 2.44693600  | 1.33803600  | 486.1593 |
| C | 2.76048500  | 1.91970800  | 2.55163800  | 489.8733 |
| C | 1.31583900  | -0.07379800 | 3.89991500  | 490.2414 |
| C | -0.65777200 | 1.26462000  | 3.79875000  | 493.7390 |
| C | 0.74396600  | 1.21783700  | 3.75076200  | 499.6051 |
| C | 1.46555300  | 2.24908700  | 3.00300700  | 502.2259 |
| C | 0.71249100  | 3.26516800  | 2.27301600  | 508.8410 |
| C | 1.32078600  | 3.83990900  | 1.14281700  | 509.9292 |
| C | -1.35424800 | -3.84622200 | 1.10283300  | 510.8402 |
| C | -0.78778300 | -3.26308500 | 2.25240700  | 512.0639 |
| C | -1.56546300 | -2.24805300 | 2.95421500  | 512.1891 |
| C | -0.86800100 | -1.20915500 | 3.72039900  | 515.1920 |
| C | 0.53117100  | -1.25286300 | 3.82742000  | 520.0756 |
| C | -1.44314400 | 0.08377700  | 3.84195300  | 523.1667 |
| C | -1.41174200 | 2.29796100  | 3.09445300  | 527.8406 |
| C | -0.75543800 | 3.26886100  | 2.31289600  | 529.4341 |
| C | -1.49797500 | 3.76907500  | 1.20812400  | 530.3099 |
| C | -0.81251900 | 4.19604300  | 0.00592300  | 534.9538 |
| C | 0.54702200  | 4.22726300  | -0.01707000 | 538.9721 |
| C | -3.37279000 | -0.57785800 | 2.53915600  | 541.1083 |
| C | -2.70142400 | 0.39554000  | 3.21472400  | 553.5815 |
| C | -2.66644300 | 1.75878600  | 2.72485100  | 556.2177 |
| C | -3.31373200 | 2.11335300  | 1.51422200  | 579.1862 |
| C | -2.73523200 | 3.19024900  | 0.80781300  | 586.6696 |
| C | -2.59615500 | -3.40265800 | 0.55139500  | 591.4923 |
| C | -3.33333200 | -2.46120400 | 1.22206700  | 596.0967 |
| C | -2.84082800 | -1.92538500 | 2.45224500  | 607.9647 |
| C | -2.43983500 | -1.92597600 | -2.82012700 | 616.7308 |
| C | -3.11379100 | -2.32443800 | -1.63627100 | 617.2472 |
| C | -2.48927000 | -3.35453000 | -0.90351800 | 629.9170 |
| C | -4.02176200 | -0.01394800 | -1.45657600 | 633.2420 |
| C | -3.29924000 | 0.35590600  | -2.66327900 | 637.1979 |
| C | -2.54160500 | -0.56847300 | -3.31394200 | 638.5966 |
| C | -4.03663100 | -1.41414200 | 0.48591100  | 638.7716 |
| C | -3.92476500 | -1.32480400 | -0.92266800 | 644.7086 |
| C | -2.78480200 | 3.22954300  | -0.65054900 | 655.1519 |
| C | -4.07098600 | -0.25651400 | 1.30535100  | 656.8541 |
| C | -4.02371600 | 1.05868600  | 0.77365400  | 658.8355 |
| C | -4.08287200 | 1.14158000  | -0.63641600 | 663.9668 |
| C | -3.42310600 | 2.23314100  | -1.34332600 | 666.8864 |
| C | -0.92569600 | 0.11152900  | 0.03836700  | 667.7137 |



|   |             |             |             |          |
|---|-------------|-------------|-------------|----------|
| O | -1.11517400 | -1.03513300 | 0.08995600  | 670.9285 |
| O | -0.79281800 | 1.26592300  | 0.01389100  | 673.5853 |
| H | 1.79649600  | 0.41876100  | 0.26352200  | 682.4378 |
| O | 1.42111100  | -0.27269900 | -0.29996000 | 687.5858 |
| H | 1.45278700  | -1.07898100 | 0.23576600  | 692.0078 |
|   |             |             |             | 693.9614 |
|   |             |             |             | 694.5869 |
|   |             |             |             | 697.2067 |
|   |             |             |             | 701.5664 |
|   |             |             |             | 701.9411 |
|   |             |             |             | 710.5708 |
|   |             |             |             | 716.6209 |
|   |             |             |             | 717.9390 |
|   |             |             |             | 719.8288 |
|   |             |             |             | 720.5216 |
|   |             |             |             | 725.1531 |
|   |             |             |             | 726.5369 |
|   |             |             |             | 729.0859 |
|   |             |             |             | 734.8141 |
|   |             |             |             | 738.4863 |
|   |             |             |             | 742.2082 |
|   |             |             |             | 744.1783 |
|   |             |             |             | 747.3421 |
|   |             |             |             | 748.1690 |
|   |             |             |             | 748.7178 |
|   |             |             |             | 750.5335 |
|   |             |             |             | 752.7242 |
|   |             |             |             | 757.1523 |
|   |             |             |             | 758.4074 |
|   |             |             |             | 758.9943 |
|   |             |             |             | 761.6575 |
|   |             |             |             | 763.3079 |
|   |             |             |             | 764.0640 |
|   |             |             |             | 764.5341 |
|   |             |             |             | 765.4913 |
|   |             |             |             | 766.2504 |
|   |             |             |             | 766.8147 |
|   |             |             |             | 767.5861 |
|   |             |             |             | 769.3676 |
|   |             |             |             | 770.2187 |
|   |             |             |             | 771.5012 |
|   |             |             |             | 773.0510 |
|   |             |             |             | 774.1239 |
|   |             |             |             | 776.1829 |
|   |             |             |             | 785.9261 |
|   |             |             |             | 787.6563 |
|   |             |             |             | 790.2202 |
|   |             |             |             | 808.4713 |
|   |             |             |             | 826.4799 |
|   |             |             |             | 830.5995 |

|  |  |                                                                                                                                                                                                                                                                                                                                                                                                                                                                                                                                                                                                                                                           |
|--|--|-----------------------------------------------------------------------------------------------------------------------------------------------------------------------------------------------------------------------------------------------------------------------------------------------------------------------------------------------------------------------------------------------------------------------------------------------------------------------------------------------------------------------------------------------------------------------------------------------------------------------------------------------------------|
|  |  | 835.7424<br>839.8511<br>847.5475<br>861.5021<br>872.6791<br>879.5180<br>879.6423<br>889.2962<br>895.3886<br>917.4750<br>918.3419<br>923.8589<br>947.5974<br>1024.7586<br>1036.2581<br>1036.6348<br>1037.8253<br>1044.7715<br>1045.6096<br>1047.8257<br>1056.6858<br>1065.2873<br>1068.5070<br>1145.7756<br>1149.7974<br>1150.0286<br>1155.6220<br>1157.2327<br>1177.0280<br>1181.9657<br>1187.1587<br>1199.4836<br>1200.9009<br>1202.3599<br>1209.7809<br>1219.4714<br>1241.2464<br>1246.0207<br>1251.1447<br>1251.7918<br>1260.8541<br>1267.5612<br>1272.9500<br>1279.9788<br>1280.8206<br>1283.7379<br>1285.6793<br>1290.9485<br>1293.3070<br>1294.8931 |
|--|--|-----------------------------------------------------------------------------------------------------------------------------------------------------------------------------------------------------------------------------------------------------------------------------------------------------------------------------------------------------------------------------------------------------------------------------------------------------------------------------------------------------------------------------------------------------------------------------------------------------------------------------------------------------------|

|  |  |                                                                                                                                                                                                                                                                                                                                                                                                                                                                                                                                                                                                                                                                        |
|--|--|------------------------------------------------------------------------------------------------------------------------------------------------------------------------------------------------------------------------------------------------------------------------------------------------------------------------------------------------------------------------------------------------------------------------------------------------------------------------------------------------------------------------------------------------------------------------------------------------------------------------------------------------------------------------|
|  |  | 1299.5293<br>1305.1778<br>1307.2199<br>1319.1050<br>1322.9297<br>1326.1194<br>1336.2565<br>1342.1306<br>1350.7871<br>1353.6516<br>1355.1042<br>1362.8258<br>1365.4750<br>1371.9622<br>1374.9453<br>1375.2484<br>1376.2402<br>1379.8379<br>1387.1651<br>1388.1876<br>1392.2440<br>1395.4229<br>1396.6013<br>1400.2250<br>1402.6470<br>1404.6410<br>1405.6900<br>1407.4680<br>1409.3076<br>1416.5300<br>1423.7402<br>1428.4638<br>1435.9168<br>1437.1825<br>1439.0922<br>1443.2036<br>1449.1169<br>1457.8555<br>1467.6058<br>1481.1950<br>1483.9286<br>1492.0433<br>1493.2210<br>1495.6404<br>1496.2250<br>1508.5828<br>1525.7077<br>1539.8512<br>1542.8473<br>1547.3602 |
|--|--|------------------------------------------------------------------------------------------------------------------------------------------------------------------------------------------------------------------------------------------------------------------------------------------------------------------------------------------------------------------------------------------------------------------------------------------------------------------------------------------------------------------------------------------------------------------------------------------------------------------------------------------------------------------------|

|        |   |             |             |             |                                                                                                                                                                                                                                                                                                                                                                                       |
|--------|---|-------------|-------------|-------------|---------------------------------------------------------------------------------------------------------------------------------------------------------------------------------------------------------------------------------------------------------------------------------------------------------------------------------------------------------------------------------------|
|        |   |             |             |             | 1551.8152<br>1563.3142<br>1564.7977<br>1568.7542<br>1585.8321<br>1593.9602<br>1597.8619<br>1599.7246<br>1601.0223<br>1608.0274<br>1613.3164<br>1616.0371<br>1623.8262<br>1627.0843<br>1633.5196<br>1641.2133<br>1667.1992<br>1674.9273<br>1677.5523<br>1679.6683<br>1703.4539<br>1706.5895<br>1711.7882<br>1715.9821<br>1721.8582<br>1726.2878<br>2018.3019<br>2217.0311<br>3720.9777 |
| CW@C84 | C | 2.56852300  | 1.91329400  | -2.72728600 | 33.0867                                                                                                                                                                                                                                                                                                                                                                               |
|        | C | 3.19021600  | 2.30552000  | -1.51693600 | 57.1165                                                                                                                                                                                                                                                                                                                                                                               |
|        | C | 2.52971100  | 3.33308700  | -0.81294900 | 63.5597                                                                                                                                                                                                                                                                                                                                                                               |
|        | C | 1.27916700  | 2.36673700  | -3.09431000 | 98.3430                                                                                                                                                                                                                                                                                                                                                                               |
|        | C | 0.55308200  | 3.29254500  | -2.31779800 | 121.8852                                                                                                                                                                                                                                                                                                                                                                              |
|        | C | 1.25827100  | 3.83074200  | -1.21187300 | 156.7643                                                                                                                                                                                                                                                                                                                                                                              |
|        | C | 3.98948700  | 1.31285800  | -0.77802900 | 184.9814                                                                                                                                                                                                                                                                                                                                                                              |
|        | C | 4.04047500  | 1.40598000  | 0.63504100  | 214.7744                                                                                                                                                                                                                                                                                                                                                                              |
|        | C | 2.69871100  | 0.55724600  | -3.21516000 | 216.5187                                                                                                                                                                                                                                                                                                                                                                              |
|        | C | 3.44455200  | -0.36283100 | -2.54347700 | 223.6944                                                                                                                                                                                                                                                                                                                                                                              |
|        | C | 4.13162800  | 0.00558000  | -1.31213300 | 225.7663                                                                                                                                                                                                                                                                                                                                                                              |
|        | C | 1.46113700  | 0.16347800  | -3.83898300 | 230.3926                                                                                                                                                                                                                                                                                                                                                                              |
|        | C | 0.97052300  | -1.16020900 | -3.71091500 | 256.7251                                                                                                                                                                                                                                                                                                                                                                              |
|        | C | -0.42288300 | -1.29678600 | -3.81552400 | 276.3660                                                                                                                                                                                                                                                                                                                                                                              |
|        | C | -0.79713300 | 1.15497800  | -3.74833300 | 281.7834                                                                                                                                                                                                                                                                                                                                                                              |
|        | C | 0.59784600  | 1.28830500  | -3.79977600 | 283.5584                                                                                                                                                                                                                                                                                                                                                                              |
|        | C | -1.28190500 | -0.17236400 | -3.89167400 | 287.0036                                                                                                                                                                                                                                                                                                                                                                              |
|        | C | -1.58798700 | 2.14488700  | -3.00825800 | 291.7500                                                                                                                                                                                                                                                                                                                                                                              |
|        | C | -1.56061500 | 3.76397500  | -1.15737600 | 297.7196                                                                                                                                                                                                                                                                                                                                                                              |
|        | C | -0.91174700 | 3.21414700  | -2.28226100 | 302.3338                                                                                                                                                                                                                                                                                                                                                                              |

|   |             |             |             |          |
|---|-------------|-------------|-------------|----------|
| C | -2.85477000 | 1.73361900  | -2.55341500 | 310.3600 |
| C | 3.51521200  | -2.23103900 | -1.21303600 | 331.5289 |
| C | 4.16750200  | -1.14695300 | -0.48365900 | 336.6548 |
| C | 4.04487000  | -1.05984400 | 0.92809300  | 345.0954 |
| C | 4.05697600  | 0.25411900  | 1.46440800  | 349.4883 |
| C | 2.82956400  | -3.20885500 | -0.53873700 | 359.9161 |
| C | 1.73444800  | -2.14237200 | -2.93921200 | 361.5573 |
| C | 2.99095400  | -1.73639300 | -2.44557200 | 362.8636 |
| C | 1.62035300  | -3.73936400 | -1.08457700 | 369.0726 |
| C | 1.01851700  | -3.19956100 | -2.23460800 | 371.5514 |
| C | 2.71853600  | -3.16422500 | 0.91369800  | 376.2468 |
| C | 3.28515300  | -2.09986300 | 1.64510000  | 382.5986 |
| C | 2.58417800  | -1.74851100 | 2.83113200  | 383.8365 |
| C | 2.59958300  | -0.38813500 | 3.32400100  | 388.6762 |
| C | 3.30082200  | 0.57792300  | 2.66862200  | 391.5435 |
| C | -0.53188200 | -4.22108700 | -0.02778700 | 405.9939 |
| C | 0.82565800  | -4.17300600 | 0.04438400  | 430.7959 |
| C | 1.46193300  | -3.73788500 | 1.26576800  | 442.3295 |
| C | 0.67775600  | -3.24898500 | 2.34292000  | 444.5707 |
| C | 1.31154300  | -2.28274000 | 3.14980900  | 448.4497 |
| C | -1.13618200 | -2.37440900 | -3.13719100 | 457.4724 |
| C | -0.44420400 | -3.29336500 | -2.32636600 | 460.2405 |
| C | -1.19682900 | -3.83789200 | -1.25191200 | 462.1499 |
| C | 2.57695300  | 3.38211700  | 0.63983700  | 462.3906 |
| C | 3.29470900  | 2.44693600  | 1.33803600  | 468.5824 |
| C | 2.76048500  | 1.91970800  | 2.55163800  | 472.1192 |
| C | 1.31583900  | -0.07379800 | 3.89991500  | 478.9361 |
| C | -0.65777200 | 1.26462000  | 3.79875000  | 486.4789 |
| C | 0.74396600  | 1.21783700  | 3.75076200  | 492.3256 |
| C | 1.46555300  | 2.24908700  | 3.00300700  | 493.0003 |
| C | 0.71249100  | 3.26516800  | 2.27301600  | 495.6454 |
| C | 1.32078600  | 3.83990900  | 1.14281700  | 500.2714 |
| C | -1.35424800 | -3.84622200 | 1.10283300  | 502.9828 |
| C | -0.78778300 | -3.26308500 | 2.25240700  | 508.5675 |
| C | -1.56546300 | -2.24805300 | 2.95421500  | 510.8823 |
| C | -0.86800100 | -1.20915500 | 3.72039900  | 511.4914 |
| C | 0.53117100  | -1.25286300 | 3.82742000  | 513.8447 |
| C | -1.44314400 | 0.08377700  | 3.84195300  | 514.9720 |
| C | -1.41174200 | 2.29796100  | 3.09445300  | 516.1581 |
| C | -0.75543800 | 3.26886100  | 2.31289600  | 523.1839 |
| C | -1.49797500 | 3.76907500  | 1.20812400  | 526.3439 |
| C | -0.81251900 | 4.19604300  | 0.00592300  | 529.5832 |
| C | 0.54702200  | 4.22726300  | -0.01707000 | 530.5368 |
| C | -3.37279000 | -0.57785800 | 2.53915600  | 531.7041 |
| C | -2.70142400 | 0.39554000  | 3.21472400  | 538.1357 |
| C | -2.66644300 | 1.75878600  | 2.72485100  | 543.0095 |
| C | -3.31373200 | 2.11335300  | 1.51422200  | 543.9964 |
| C | -2.73523200 | 3.19024900  | 0.80781300  | 556.4666 |
| C | -2.59615500 | -3.40265800 | 0.55139500  | 582.3359 |
| C | -3.33333200 | -2.46120400 | 1.22206700  | 587.9691 |

|   |             |             |             |          |
|---|-------------|-------------|-------------|----------|
| C | -2.84082800 | -1.92538500 | 2.45224500  | 593.3404 |
| C | -2.43983500 | -1.92597600 | -2.82012700 | 595.2965 |
| C | -3.11379100 | -2.32443800 | -1.63627100 | 608.2429 |
| C | -2.48927000 | -3.35453000 | -0.90351800 | 608.7199 |
| C | -4.02176200 | -0.01394800 | -1.45657600 | 617.6630 |
| C | -3.29924000 | 0.35590600  | -2.66327900 | 617.9974 |
| C | -2.54160500 | -0.56847300 | -3.31394200 | 629.8951 |
| C | -4.03663100 | -1.41414200 | 0.48591100  | 634.6753 |
| C | -3.92476500 | -1.32480400 | -0.92266800 | 638.1365 |
| C | -2.78480200 | 3.22954300  | -0.65054900 | 639.5530 |
| C | -4.07098600 | -0.25651400 | 1.30535100  | 645.2537 |
| C | -4.02371600 | 1.05868600  | 0.77365400  | 647.3367 |
| C | -4.08287200 | 1.14158000  | -0.63641600 | 655.7901 |
| C | -3.42310600 | 2.23314100  | -1.34332600 | 657.3061 |
| C | -0.92569600 | 0.11152900  | 0.03836700  | 660.1289 |
| O | -1.11517400 | -1.03513300 | 0.08995600  | 664.3744 |
| O | -0.79281800 | 1.26592300  | 0.01389100  | 667.4302 |
| H | 1.79649600  | 0.41876100  | 0.26352200  | 668.9983 |
| O | 1.42111100  | -0.27269900 | -0.29996000 | 672.3348 |
| H | 1.45278700  | -1.07898100 | 0.23576600  | 674.8845 |
|   |             |             |             | 682.9746 |
|   |             |             |             | 687.7898 |
|   |             |             |             | 692.6601 |
|   |             |             |             | 694.2092 |
|   |             |             |             | 695.0052 |
|   |             |             |             | 697.7311 |
|   |             |             |             | 702.1782 |
|   |             |             |             | 702.3856 |
|   |             |             |             | 712.3127 |
|   |             |             |             | 717.8799 |
|   |             |             |             | 718.9893 |
|   |             |             |             | 720.4852 |
|   |             |             |             | 720.7772 |
|   |             |             |             | 726.2408 |
|   |             |             |             | 728.6006 |
|   |             |             |             | 730.9798 |
|   |             |             |             | 735.4339 |
|   |             |             |             | 740.5295 |
|   |             |             |             | 742.9563 |
|   |             |             |             | 745.5414 |
|   |             |             |             | 748.3414 |
|   |             |             |             | 749.4809 |
|   |             |             |             | 750.6003 |
|   |             |             |             | 752.5108 |
|   |             |             |             | 753.8384 |
|   |             |             |             | 758.9431 |
|   |             |             |             | 759.8724 |
|   |             |             |             | 762.2125 |
|   |             |             |             | 762.9879 |
|   |             |             |             | 764.2990 |

|  |  |                                                                                                                                                                                                                                                                                                                                                                                                                                                                                                                                                                                                                                           |
|--|--|-------------------------------------------------------------------------------------------------------------------------------------------------------------------------------------------------------------------------------------------------------------------------------------------------------------------------------------------------------------------------------------------------------------------------------------------------------------------------------------------------------------------------------------------------------------------------------------------------------------------------------------------|
|  |  | 765.3244<br>765.6895<br>767.0176<br>767.9684<br>768.7307<br>769.7480<br>771.0718<br>772.4798<br>773.5281<br>773.6702<br>774.6970<br>775.1222<br>787.1508<br>789.1250<br>809.0641<br>825.4840<br>835.1875<br>840.0469<br>846.4467<br>861.6700<br>873.2940<br>879.3494<br>880.5497<br>889.5954<br>895.2717<br>917.7271<br>918.3566<br>922.6368<br>947.6288<br>1034.9903<br>1036.3038<br>1037.6665<br>1043.6615<br>1045.6485<br>1048.2048<br>1057.0622<br>1065.6928<br>1068.5186<br>1144.6693<br>1150.8604<br>1151.8983<br>1154.0628<br>1155.7260<br>1176.2310<br>1180.8862<br>1187.3221<br>1199.9825<br>1201.5655<br>1202.6351<br>1211.3183 |
|--|--|-------------------------------------------------------------------------------------------------------------------------------------------------------------------------------------------------------------------------------------------------------------------------------------------------------------------------------------------------------------------------------------------------------------------------------------------------------------------------------------------------------------------------------------------------------------------------------------------------------------------------------------------|

|  |  |                                                                                                                                                                                                                                                                                                                                                                                                                                                                                                                                                                                                                                                                        |
|--|--|------------------------------------------------------------------------------------------------------------------------------------------------------------------------------------------------------------------------------------------------------------------------------------------------------------------------------------------------------------------------------------------------------------------------------------------------------------------------------------------------------------------------------------------------------------------------------------------------------------------------------------------------------------------------|
|  |  | 1218.5453<br>1242.4413<br>1244.3980<br>1250.7438<br>1251.5355<br>1260.8193<br>1267.0646<br>1279.1932<br>1280.4932<br>1283.7021<br>1285.4887<br>1290.5572<br>1295.4277<br>1295.8351<br>1299.7659<br>1303.3306<br>1307.5067<br>1320.1608<br>1323.2924<br>1326.6497<br>1339.2826<br>1351.9794<br>1353.2686<br>1354.7831<br>1362.3780<br>1364.1621<br>1370.5700<br>1372.2406<br>1374.0869<br>1375.0818<br>1378.4045<br>1387.0364<br>1388.9630<br>1391.5387<br>1392.0042<br>1395.8701<br>1399.3766<br>1401.0178<br>1405.0747<br>1406.5573<br>1407.9061<br>1409.4454<br>1414.5130<br>1420.5792<br>1423.2782<br>1427.4439<br>1435.5566<br>1436.7126<br>1437.2826<br>1443.0531 |
|--|--|------------------------------------------------------------------------------------------------------------------------------------------------------------------------------------------------------------------------------------------------------------------------------------------------------------------------------------------------------------------------------------------------------------------------------------------------------------------------------------------------------------------------------------------------------------------------------------------------------------------------------------------------------------------------|



|               |   |            |            |             |                                                                                                                                                                                                                                                                                                                                                                                                                                                                                                                                                                                          |
|---------------|---|------------|------------|-------------|------------------------------------------------------------------------------------------------------------------------------------------------------------------------------------------------------------------------------------------------------------------------------------------------------------------------------------------------------------------------------------------------------------------------------------------------------------------------------------------------------------------------------------------------------------------------------------------|
|               |   |            |            |             | 1447.6098<br>1457.6916<br>1468.2261<br>1480.7142<br>1483.3569<br>1491.5287<br>1492.2954<br>1496.2656<br>1497.2436<br>1508.5721<br>1524.5093<br>1539.0604<br>1542.3084<br>1545.7758<br>1552.0246<br>1560.4013<br>1565.5533<br>1566.9152<br>1581.0168<br>1591.9966<br>1596.2013<br>1597.8702<br>1598.9336<br>1607.7866<br>1609.3946<br>1611.0316<br>1615.5966<br>1621.6041<br>1626.1202<br>1631.2674<br>1639.4421<br>1659.5804<br>1668.0757<br>1668.9237<br>1671.1202<br>1699.4240<br>1701.0068<br>1705.7430<br>1709.2166<br>1714.0815<br>1716.9103<br>2465.1751<br>3802.3955<br>3909.5472 |
| CA_WM<br>@C70 | C | 3.24373700 | 2.29903700 | 0.71591200  | 42.0373                                                                                                                                                                                                                                                                                                                                                                                                                                                                                                                                                                                  |
|               | C | 2.44500700 | 2.99872400 | -0.28482700 | 71.5680                                                                                                                                                                                                                                                                                                                                                                                                                                                                                                                                                                                  |
|               | C | 4.00238300 | 1.17788700 | 0.38057500  | 104.1476                                                                                                                                                                                                                                                                                                                                                                                                                                                                                                                                                                                 |
|               | C | 2.42622300 | 2.56426500 | -1.59318900 | 143.9985                                                                                                                                                                                                                                                                                                                                                                                                                                                                                                                                                                                 |
|               | C | 1.19321400 | 2.59686900 | -2.37784100 | 233.4779                                                                                                                                                                                                                                                                                                                                                                                                                                                                                                                                                                                 |

|   |             |             |             |          |
|---|-------------|-------------|-------------|----------|
| C | -0.00811100 | 3.16304000  | -1.85413600 | 241.3399 |
| C | -1.21656900 | 2.59467600  | -2.36226700 | 248.6700 |
| C | 3.28059300  | 0.02347800  | 2.43913300  | 255.2139 |
| C | 2.48333900  | 1.19842100  | 2.77335400  | 259.7253 |
| C | 4.03000800  | 0.00657000  | 1.25884800  | 269.2312 |
| C | 2.46421400  | 2.30070700  | 1.93439800  | 276.9013 |
| C | 1.21560200  | 3.01248800  | 1.67154700  | 284.7412 |
| C | 0.01349700  | 2.65193800  | 2.32322800  | 296.7503 |
| C | -1.19194300 | 3.00897300  | 1.67357300  | 333.4211 |
| C | 0.00086500  | 3.61784200  | -0.43225300 | 339.3259 |
| C | 1.20856700  | 3.47534300  | 0.31926200  | 340.6493 |
| C | -1.20014400 | 3.47496700  | 0.32422900  | 342.2833 |
| C | 3.22604400  | -2.29401400 | 0.76380900  | 344.3081 |
| C | 2.44832000  | -2.26197700 | 1.97937600  | 357.0234 |
| C | 3.98799200  | -1.18044700 | 0.40565000  | 360.0769 |
| C | 2.46998400  | -1.13545300 | 2.78785400  | 362.7290 |
| C | 1.21970400  | -0.67437800 | 3.37049400  | 370.7301 |
| C | 0.00890000  | -1.40130600 | 3.23491800  | 373.5654 |
| C | -1.20240700 | -0.67381000 | 3.37868700  | 397.2547 |
| C | 0.01584700  | 1.47431500  | 3.19881500  | 400.5004 |
| C | 1.22482700  | 0.75051400  | 3.35605300  | 424.6361 |
| C | -1.19703300 | 0.75041700  | 3.35836900  | 432.5310 |
| C | 3.18416300  | -1.44506200 | -1.91385300 | 438.8579 |
| C | 2.42557300  | -2.62479000 | -1.54573400 | 444.6818 |
| C | 3.94717900  | -0.74458700 | -0.97846300 | 450.8557 |
| C | 2.44282900  | -3.03181800 | -0.22219500 | 452.9607 |
| C | 1.19858900  | -3.48951400 | 0.39903000  | 455.4918 |
| C | -0.01721400 | -3.62660300 | -0.35058900 | 460.0284 |
| C | -1.21953300 | -3.45609200 | 0.40608200  | 466.3198 |
| C | -0.00032300 | -2.59984600 | 2.38817400  | 474.5479 |
| C | 1.20172400  | -2.98138200 | 1.74393800  | 475.4857 |
| C | -1.21144700 | -2.96770000 | 1.74787500  | 498.5863 |
| C | 3.18549400  | 1.37924700  | -1.93897100 | 503.6279 |
| C | 2.39503900  | 0.64861600  | -2.89823200 | 504.9864 |
| C | 3.95448100  | 0.70448700  | -0.99437900 | 515.8645 |
| C | 2.39621800  | -0.73520900 | -2.88990100 | 523.0329 |
| C | 1.17591800  | -1.48282400 | -3.14372100 | 526.1678 |
| C | -0.02038200 | -0.78485900 | -3.44361100 | 528.2169 |
| C | -1.21911400 | -1.46182300 | -3.10950700 | 530.2051 |
| C | -0.01998700 | -3.20200600 | -1.78093100 | 533.5586 |
| C | 1.18877400  | -2.66885800 | -2.32999000 | 537.2116 |
| C | -1.22627800 | -2.63566600 | -2.29284500 | 545.9672 |
| C | -0.01959500 | 0.70038400  | -3.45834400 | 547.9874 |
| C | 1.17786500  | 1.39642400  | -3.16534200 | 552.9778 |
| C | -1.21449500 | 1.39631300  | -3.14885200 | 556.4674 |
| C | -3.23608700 | -1.42531400 | -1.88526600 | 557.3614 |
| C | -2.44457800 | -0.71801400 | -2.86212100 | 559.0058 |
| C | -2.44097600 | 0.66218800  | -2.87775300 | 561.5118 |
| C | -4.00680400 | -0.72995000 | -0.95014300 | 563.4117 |
| C | -3.26393800 | -2.28474600 | 0.79539000  | 566.2610 |

|   |             |             |             |          |
|---|-------------|-------------|-------------|----------|
| C | -2.47159500 | -3.00631300 | -0.19458500 | 568.2155 |
| C | -2.46072600 | -2.59283300 | -1.51065100 | 571.2894 |
| C | -4.03642300 | -1.17130700 | 0.43888600  | 575.6919 |
| C | -3.27193000 | 0.03231400  | 2.45441200  | 583.3202 |
| C | -2.46595700 | -1.12894800 | 2.80689300  | 585.1809 |
| C | -2.46206900 | -2.25464800 | 1.99920500  | 595.8903 |
| C | -4.04748600 | 0.02051800  | 1.28743800  | 599.2934 |
| C | -3.23895500 | 2.30118100  | 0.73351100  | 604.0463 |
| C | -2.43775200 | 2.29519400  | 1.93558900  | 609.1829 |
| C | -2.45718700 | 1.19652100  | 2.77600200  | 621.0225 |
| C | -4.02295200 | 1.19197800  | 0.40870100  | 636.2625 |
| C | -3.22909700 | 1.39490500  | -1.91706000 | 641.7778 |
| C | -2.45078300 | 2.57116600  | -1.57532900 | 643.3715 |
| C | -2.44926200 | 3.00513500  | -0.26824800 | 650.4758 |
| C | -4.00201100 | 0.72280100  | -0.96832100 | 652.7243 |
| C | 0.73847700  | 0.10164200  | -0.16301800 | 656.8793 |
| O | 1.67821600  | 0.10838100  | 0.56845900  | 660.8922 |
| O | 0.09704700  | 1.14390900  | -0.55362500 | 675.2061 |
| H | -0.86672200 | 0.87528300  | -0.53640900 | 677.2319 |
| O | 0.22608600  | -1.03097400 | -0.60142000 | 685.8829 |
| H | 0.73218900  | -1.71649000 | -0.14308900 | 688.5081 |
| H | -1.53343900 | -0.86116200 | -0.06757700 | 691.5804 |
| H | -1.23842800 | 0.01861400  | 1.14685800  | 694.1688 |
| O | -1.74308600 | -0.00288900 | 0.32155500  | 700.8685 |
|   |             |             |             | 720.0703 |
|   |             |             |             | 724.5041 |
|   |             |             |             | 726.1314 |
|   |             |             |             | 731.7098 |
|   |             |             |             | 733.1039 |
|   |             |             |             | 735.9337 |
|   |             |             |             | 737.0050 |
|   |             |             |             | 738.6125 |
|   |             |             |             | 740.9729 |
|   |             |             |             | 743.0379 |
|   |             |             |             | 744.7770 |
|   |             |             |             | 747.1716 |
|   |             |             |             | 747.3768 |
|   |             |             |             | 749.2980 |
|   |             |             |             | 750.7699 |
|   |             |             |             | 752.2034 |
|   |             |             |             | 753.4988 |
|   |             |             |             | 755.4498 |
|   |             |             |             | 756.2261 |
|   |             |             |             | 759.0147 |
|   |             |             |             | 761.8173 |
|   |             |             |             | 763.7441 |
|   |             |             |             | 765.8142 |
|   |             |             |             | 768.5533 |
|   |             |             |             | 769.7219 |
|   |             |             |             | 772.2581 |

|  |  |                                                                                                                                                                                                                                                                                                                                                                                                                                                                                                                                                                                                                                             |
|--|--|---------------------------------------------------------------------------------------------------------------------------------------------------------------------------------------------------------------------------------------------------------------------------------------------------------------------------------------------------------------------------------------------------------------------------------------------------------------------------------------------------------------------------------------------------------------------------------------------------------------------------------------------|
|  |  | 772.9000<br>775.6992<br>776.8835<br>778.1828<br>780.1324<br>782.5601<br>783.7105<br>784.2205<br>788.8087<br>793.7284<br>794.3417<br>795.7014<br>797.7281<br>806.4802<br>808.9160<br>839.5631<br>843.1004<br>895.1571<br>902.1025<br>921.9851<br>927.3680<br>932.0531<br>933.5038<br>945.9101<br>960.7345<br>965.1012<br>975.4260<br>1057.8285<br>1061.5755<br>1066.5743<br>1068.0669<br>1080.6886<br>1096.1697<br>1096.9035<br>1099.4000<br>1108.3603<br>1144.2625<br>1160.7449<br>1175.6387<br>1177.1573<br>1187.2908<br>1190.1881<br>1194.4682<br>1196.5242<br>1200.8984<br>1207.3526<br>1210.5364<br>1223.1054<br>1243.6826<br>1248.3709 |
|--|--|---------------------------------------------------------------------------------------------------------------------------------------------------------------------------------------------------------------------------------------------------------------------------------------------------------------------------------------------------------------------------------------------------------------------------------------------------------------------------------------------------------------------------------------------------------------------------------------------------------------------------------------------|

|  |  |                                                                                                                                                                                                                                                                                                                                                                                                                                                                                                                                                                                                                                                                        |
|--|--|------------------------------------------------------------------------------------------------------------------------------------------------------------------------------------------------------------------------------------------------------------------------------------------------------------------------------------------------------------------------------------------------------------------------------------------------------------------------------------------------------------------------------------------------------------------------------------------------------------------------------------------------------------------------|
|  |  | 1251.1008<br>1252.4745<br>1256.9096<br>1266.5028<br>1279.3715<br>1281.9297<br>1283.3130<br>1290.4081<br>1293.6567<br>1304.3705<br>1311.5191<br>1315.3201<br>1321.6723<br>1323.5052<br>1327.3277<br>1331.7176<br>1334.1850<br>1334.3857<br>1337.1121<br>1346.2752<br>1347.9826<br>1350.4221<br>1355.8737<br>1362.0956<br>1364.3503<br>1372.4370<br>1374.7733<br>1380.4992<br>1383.7847<br>1391.2185<br>1396.8824<br>1401.2462<br>1406.0605<br>1424.5119<br>1427.2060<br>1429.7970<br>1439.8264<br>1446.7386<br>1454.0327<br>1459.6511<br>1466.6140<br>1470.5034<br>1482.2918<br>1490.0672<br>1491.8072<br>1497.5978<br>1502.3479<br>1517.4593<br>1532.1229<br>1540.7789 |
|--|--|------------------------------------------------------------------------------------------------------------------------------------------------------------------------------------------------------------------------------------------------------------------------------------------------------------------------------------------------------------------------------------------------------------------------------------------------------------------------------------------------------------------------------------------------------------------------------------------------------------------------------------------------------------------------|

|               |   |             |             |             |                                                                                                                                                                                                                                                                                                                                                |
|---------------|---|-------------|-------------|-------------|------------------------------------------------------------------------------------------------------------------------------------------------------------------------------------------------------------------------------------------------------------------------------------------------------------------------------------------------|
|               |   |             |             |             | 1548.6005<br>1553.0544<br>1554.3076<br>1564.3081<br>1568.6530<br>1570.0610<br>1575.4808<br>1576.3219<br>1602.8280<br>1609.3273<br>1624.5638<br>1627.7816<br>1629.4098<br>1632.7505<br>1635.6320<br>1639.6324<br>1640.5074<br>1642.3209<br>1647.4617<br>1651.1211<br>1656.2094<br>2026.5595<br>3160.7667<br>3756.2556<br>3820.0660<br>3892.3462 |
| CA_WM<br>@C84 | C | 2.35981200  | 2.15843900  | -2.71158700 | 31.7238                                                                                                                                                                                                                                                                                                                                        |
|               | C | 2.96669400  | 2.56931000  | -1.49988100 | 67.4545                                                                                                                                                                                                                                                                                                                                        |
|               | C | 2.25106500  | 3.53966800  | -0.76650000 | 91.1261                                                                                                                                                                                                                                                                                                                                        |
|               | C | 1.03704000  | 2.52935800  | -3.06232000 | 120.1139                                                                                                                                                                                                                                                                                                                                       |
|               | C | 0.26249000  | 3.39824300  | -2.26101500 | 152.7194                                                                                                                                                                                                                                                                                                                                       |
|               | C | 0.94486800  | 3.96770200  | -1.14388900 | 160.2688                                                                                                                                                                                                                                                                                                                                       |
|               | C | 3.83866000  | 1.61482400  | -0.79446600 | 170.4342                                                                                                                                                                                                                                                                                                                                       |
|               | C | 3.90898300  | 1.67761700  | 0.61242000  | 207.0401                                                                                                                                                                                                                                                                                                                                       |
|               | C | 2.58182500  | 0.82609800  | -3.23028300 | 220.3211                                                                                                                                                                                                                                                                                                                                       |
|               | C | 3.39891100  | -0.05216900 | -2.58449000 | 223.8487                                                                                                                                                                                                                                                                                                                                       |
|               | C | 4.07116900  | 0.33436300  | -1.35641700 | 224.8843                                                                                                                                                                                                                                                                                                                                       |
|               | C | 1.37118600  | 0.35837600  | -3.85208900 | 230.7027                                                                                                                                                                                                                                                                                                                                       |
|               | C | 0.98693400  | -1.00189000 | -3.75347900 | 258.8785                                                                                                                                                                                                                                                                                                                                       |
|               | C | -0.39327100 | -1.23985400 | -3.85899100 | 265.0182                                                                                                                                                                                                                                                                                                                                       |
|               | C | -0.95596700 | 1.17283500  | -3.73486700 | 284.0557                                                                                                                                                                                                                                                                                                                                       |
|               | C | 0.42550100  | 1.41457700  | -3.78426900 | 289.0383                                                                                                                                                                                                                                                                                                                                       |
|               | C | -1.34221100 | -0.18519800 | -3.91345100 | 290.8555                                                                                                                                                                                                                                                                                                                                       |
|               | C | -1.80279700 | 2.08265600  | -2.95335700 | 293.8336                                                                                                                                                                                                                                                                                                                                       |
|               | C | -1.84949000 | 3.64333900  | -1.04355100 | 299.2595                                                                                                                                                                                                                                                                                                                                       |
|               | C | -1.19281400 | 3.18627200  | -2.20454800 | 304.7243                                                                                                                                                                                                                                                                                                                                       |
|               | C | -3.02417600 | 1.55822300  | -2.48718100 | 306.2893                                                                                                                                                                                                                                                                                                                                       |
|               | C | 3.66527700  | -1.95274200 | -1.31696000 | 331.5407                                                                                                                                                                                                                                                                                                                                       |
|               | C | 4.22877800  | -0.83215600 | -0.56575400 | 336.1870                                                                                                                                                                                                                                                                                                                                       |

|   |             |             |             |          |
|---|-------------|-------------|-------------|----------|
| C | 4.12867700  | -0.78826100 | 0.84773400  | 342.7471 |
| C | 4.03630400  | 0.51159500  | 1.40873100  | 344.8476 |
| C | 3.08440200  | -3.00741300 | -0.65983300 | 350.0507 |
| C | 1.84240400  | -1.94376800 | -3.01724900 | 362.6718 |
| C | 3.07040300  | -1.46153300 | -2.52319600 | 364.2037 |
| C | 1.90125500  | -3.60224800 | -1.20521100 | 367.6787 |
| C | 1.23092000  | -3.07581500 | -2.33191300 | 375.9446 |
| C | 2.99413800  | -3.00241900 | 0.80127900  | 377.7535 |
| C | 3.47852900  | -1.90862100 | 1.55237700  | 381.0390 |
| C | 2.76316900  | -1.62880600 | 2.75081300  | 384.8509 |
| C | 2.67496400  | -0.28077600 | 3.27345500  | 391.3062 |
| C | 3.28033900  | 0.75152800  | 2.62851100  | 393.1239 |
| C | -0.19483500 | -4.24550500 | -0.12741900 | 394.4069 |
| C | 1.15781700  | -4.10995400 | -0.07147900 | 430.0005 |
| C | 1.78315400  | -3.66437900 | 1.15424900  | 446.6045 |
| C | 0.97468600  | -3.25404700 | 2.25236600  | 449.0889 |
| C | 1.53720900  | -2.26141400 | 3.07631600  | 452.9016 |
| C | -1.00570600 | -2.38343000 | -3.19123500 | 459.9565 |
| C | -0.22498900 | -3.26333100 | -2.40870900 | 462.8481 |
| C | -0.90792800 | -3.88031500 | -1.33052700 | 469.3442 |
| C | 2.31725500  | 3.55301600  | 0.68880000  | 472.3035 |
| C | 3.10477900  | 2.64600500  | 1.34871100  | 475.4279 |
| C | 2.63638300  | 2.05135000  | 2.55439700  | 478.2045 |
| C | 1.37810000  | -0.07759200 | 3.87270400  | 484.7605 |
| C | -0.69443200 | 1.10680500  | 3.85890000  | 486.1797 |
| C | 0.70328200  | 1.16863400  | 3.76746100  | 493.6293 |
| C | 1.33213900  | 2.27241500  | 3.03293400  | 496.2375 |
| C | 0.50099200  | 3.25355800  | 2.34456400  | 496.8926 |
| C | 1.04419800  | 3.91187800  | 1.22237400  | 499.9263 |
| C | -1.02252300 | -3.95066000 | 1.02355800  | 502.7665 |
| C | -0.48958200 | -3.36412300 | 2.18636600  | 507.7582 |
| C | -1.33927200 | -2.43889700 | 2.94186600  | 510.5152 |
| C | -0.71713700 | -1.37113900 | 3.73335500  | 511.8392 |
| C | 0.68681500  | -1.31024600 | 3.79288700  | 514.0299 |
| C | -1.39287900 | -0.13034400 | 3.90588600  | 514.6740 |
| C | -1.53148200 | 2.09455100  | 3.18090100  | 518.1879 |
| C | -0.95776800 | 3.12707700  | 2.40582900  | 524.9513 |
| C | -1.74439300 | 3.58739900  | 1.31750800  | 527.3044 |
| C | -1.12220800 | 4.11616600  | 0.11946400  | 530.4485 |
| C | 0.22792900  | 4.27802200  | 0.07919000  | 532.5042 |
| C | -3.29644100 | -0.90337200 | 2.60719500  | 534.6591 |
| C | -2.68523300 | 0.10086300  | 3.30168300  | 539.5613 |
| C | -2.75060800 | 1.47276200  | 2.82741300  | 542.9494 |
| C | -3.42461600 | 1.79348000  | 1.61991200  | 544.0249 |
| C | -2.92983500 | 2.91398100  | 0.92230800  | 546.1505 |
| C | -2.29791400 | -3.58044100 | 0.50100000  | 547.5141 |
| C | -3.09986600 | -2.72644400 | 1.21302900  | 558.3500 |
| C | -2.64910500 | -2.20010000 | 2.46750500  | 576.9707 |
| C | -2.33640200 | -2.04563700 | -2.85309400 | 582.4467 |
| C | -2.94200300 | -2.50991500 | -1.65507700 | 591.0741 |

|   |             |             |             |          |
|---|-------------|-------------|-------------|----------|
| C | -2.22277600 | -3.49411500 | -0.95154000 | 594.4858 |
| C | -4.02784200 | -0.29545300 | -1.40962500 | 595.3545 |
| C | -3.37176000 | 0.15498000  | -2.63280900 | 597.8266 |
| C | -2.56100600 | -0.69193100 | -3.32694400 | 607.7743 |
| C | -3.89277200 | -1.72516600 | 0.51121300  | 616.7027 |
| C | -3.81266700 | -1.59785300 | -0.90007400 | 616.8622 |
| C | -3.00852200 | 2.98792500  | -0.53084800 | 629.7255 |
| C | -4.01770800 | -0.60462800 | 1.37184200  | 633.4249 |
| C | -4.06845700 | 0.71484700  | 0.85924800  | 634.8980 |
| C | -4.15369400 | 0.82345100  | -0.55107200 | 637.6950 |
| C | -3.58820700 | 1.97316600  | -1.24353000 | 638.7765 |
| C | -0.67458400 | 0.35951500  | -0.09296900 | 645.0971 |
| O | -1.00555200 | -0.20337900 | -1.10885700 | 654.6365 |
| O | 0.01653000  | 1.47669100  | 0.00239800  | 659.6744 |
| H | 0.41119200  | 1.63437200  | -0.87018800 | 660.2421 |
| O | -0.94859500 | -0.09945500 | 1.12229400  | 665.5705 |
| H | -1.48553600 | -0.89781400 | 0.99372200  | 666.2600 |
| H | 1.24233800  | -0.89119200 | 0.83520000  | 668.8672 |
| H | 0.89175300  | -1.38097200 | -0.57411800 | 673.4575 |
| O | 1.46648100  | -0.76648300 | -0.09733200 | 675.0645 |
|   |             |             |             | 681.5050 |
|   |             |             |             | 687.9250 |
|   |             |             |             | 692.9215 |
|   |             |             |             | 693.8583 |
|   |             |             |             | 694.0531 |
|   |             |             |             | 699.3435 |
|   |             |             |             | 700.9210 |
|   |             |             |             | 702.6386 |
|   |             |             |             | 711.9395 |
|   |             |             |             | 718.7112 |
|   |             |             |             | 719.4515 |
|   |             |             |             | 721.1572 |
|   |             |             |             | 721.4091 |
|   |             |             |             | 728.0732 |
|   |             |             |             | 728.1926 |
|   |             |             |             | 733.1529 |
|   |             |             |             | 735.0511 |
|   |             |             |             | 741.7431 |
|   |             |             |             | 744.1004 |
|   |             |             |             | 746.0669 |
|   |             |             |             | 748.5201 |
|   |             |             |             | 749.2267 |
|   |             |             |             | 750.5615 |
|   |             |             |             | 752.5670 |
|   |             |             |             | 753.8294 |
|   |             |             |             | 758.1503 |
|   |             |             |             | 760.7116 |
|   |             |             |             | 761.0515 |
|   |             |             |             | 763.7620 |
|   |             |             |             | 763.9410 |



|  |  |                                                                                                                                                                                                                                                                                                                                                                                                                                                                                                                                                                                                                                          |
|--|--|------------------------------------------------------------------------------------------------------------------------------------------------------------------------------------------------------------------------------------------------------------------------------------------------------------------------------------------------------------------------------------------------------------------------------------------------------------------------------------------------------------------------------------------------------------------------------------------------------------------------------------------|
|  |  | 765.9223<br>766.6762<br>767.1977<br>769.0092<br>769.5783<br>771.0260<br>771.5548<br>772.8371<br>774.0017<br>775.1027<br>779.3701<br>779.5994<br>787.0321<br>788.4556<br>804.9948<br>808.0304<br>824.8042<br>834.0299<br>838.3050<br>844.1873<br>858.6762<br>872.1608<br>874.5483<br>877.8218<br>885.8729<br>894.6794<br>914.0630<br>915.4713<br>921.7184<br>947.2098<br>1030.2781<br>1031.7459<br>1032.9035<br>1040.3762<br>1041.9637<br>1043.2345<br>1050.1155<br>1060.5436<br>1064.5131<br>1078.8708<br>1140.1916<br>1142.2787<br>1145.3025<br>1151.8423<br>1153.0655<br>1167.4411<br>1175.8728<br>1180.2216<br>1191.4685<br>1193.9368 |
|--|--|------------------------------------------------------------------------------------------------------------------------------------------------------------------------------------------------------------------------------------------------------------------------------------------------------------------------------------------------------------------------------------------------------------------------------------------------------------------------------------------------------------------------------------------------------------------------------------------------------------------------------------------|

|  |  |                                                                                                                                                                                                                                                                                                                                                                                                                                                                                                                                                                                                                                                                        |
|--|--|------------------------------------------------------------------------------------------------------------------------------------------------------------------------------------------------------------------------------------------------------------------------------------------------------------------------------------------------------------------------------------------------------------------------------------------------------------------------------------------------------------------------------------------------------------------------------------------------------------------------------------------------------------------------|
|  |  | 1198.7999<br>1200.2205<br>1205.1819<br>1215.1127<br>1235.0418<br>1240.1613<br>1245.3009<br>1246.1360<br>1254.8602<br>1264.5382<br>1271.2508<br>1275.8049<br>1277.5208<br>1279.8194<br>1285.3570<br>1287.1530<br>1289.9387<br>1292.8138<br>1297.7367<br>1302.7487<br>1311.3575<br>1314.2672<br>1315.9845<br>1322.3550<br>1335.3665<br>1345.4340<br>1347.0478<br>1350.3323<br>1355.4658<br>1357.2909<br>1363.6352<br>1366.3738<br>1369.4058<br>1370.2043<br>1372.1070<br>1378.0685<br>1381.5490<br>1382.8175<br>1388.5484<br>1389.3257<br>1391.1908<br>1394.8891<br>1398.4340<br>1399.2239<br>1399.5062<br>1400.8474<br>1410.5352<br>1415.4784<br>1421.9939<br>1427.2153 |
|--|--|------------------------------------------------------------------------------------------------------------------------------------------------------------------------------------------------------------------------------------------------------------------------------------------------------------------------------------------------------------------------------------------------------------------------------------------------------------------------------------------------------------------------------------------------------------------------------------------------------------------------------------------------------------------------|

|  |  |                                                                                                                                                                                                                                                                                                                                                                                                                                                                                                                                                                                                                                                                        |
|--|--|------------------------------------------------------------------------------------------------------------------------------------------------------------------------------------------------------------------------------------------------------------------------------------------------------------------------------------------------------------------------------------------------------------------------------------------------------------------------------------------------------------------------------------------------------------------------------------------------------------------------------------------------------------------------|
|  |  | 1430.0975<br>1432.6418<br>1435.0200<br>1443.7981<br>1450.9454<br>1460.1198<br>1472.5656<br>1475.6758<br>1484.5596<br>1485.6575<br>1487.9804<br>1489.8297<br>1501.3059<br>1518.7720<br>1532.1417<br>1535.3270<br>1538.6543<br>1544.9324<br>1549.4043<br>1557.8883<br>1559.4129<br>1561.9642<br>1579.7515<br>1586.0110<br>1590.0079<br>1593.4996<br>1596.0183<br>1600.5708<br>1607.4049<br>1608.3665<br>1617.3461<br>1619.5869<br>1626.5302<br>1633.3005<br>1634.7267<br>1659.7059<br>1666.3248<br>1671.0537<br>1675.5661<br>1691.0486<br>1702.5696<br>1704.5356<br>1712.2919<br>1716.4130<br>1719.4510<br>1894.8523<br>3797.8927<br>3816.9449<br>3828.4851<br>3917.9204 |
|--|--|------------------------------------------------------------------------------------------------------------------------------------------------------------------------------------------------------------------------------------------------------------------------------------------------------------------------------------------------------------------------------------------------------------------------------------------------------------------------------------------------------------------------------------------------------------------------------------------------------------------------------------------------------------------------|

|               |             |             |             |             |           |
|---------------|-------------|-------------|-------------|-------------|-----------|
| TS_WM@<br>C84 | C           | -2.50929100 | 1.85060300  | 2.79122800  | -739.1866 |
|               | C           | -3.06635000 | 2.37661200  | 1.60195400  | 41.2015   |
|               | C           | -2.32624200 | 3.41740000  | 1.00145300  | 74.7487   |
|               | C           | -1.20897600 | 2.19122200  | 3.22824300  | 101.1739  |
|               | C           | -0.40933400 | 3.13123300  | 2.54986700  | 139.6859  |
|               | C           | -1.04367300 | 3.80702200  | 1.47404100  | 155.0842  |
|               | C           | -3.90283700 | 1.49445200  | 0.76998100  | 168.3375  |
|               | C           | -3.90332300 | 1.70010000  | -0.62851500 | 187.5319  |
|               | C           | -2.74226000 | 0.47085100  | 3.16420300  | 219.7448  |
|               | C           | -3.53388600 | -0.34300700 | 2.40941900  | 221.8169  |
|               | C           | -4.16049300 | 0.16306800  | 1.19480400  | 230.4408  |
|               | C           | -1.55515500 | -0.05088900 | 3.79335900  | 234.8033  |
|               | C           | -1.15114600 | -1.39366100 | 3.58978100  | 248.0362  |
|               | C           | 0.22900100  | -1.63537100 | 3.73757300  | 282.1183  |
|               | C           | 0.76287800  | 0.78845400  | 3.84782400  | 285.1478  |
|               | C           | -0.61949800 | 1.01420300  | 3.86159400  | 290.3529  |
|               | C           | 1.15837500  | -0.57656200 | 3.91747600  | 294.8613  |
|               | C           | 1.63044500  | 1.77598200  | 3.19543700  | 295.7808  |
|               | C           | 1.75552300  | 3.52318400  | 1.47267500  | 307.1293  |
|               | C           | 1.04460300  | 2.94233600  | 2.53932700  | 308.5429  |
|               | C           | 2.87885900  | 1.31904300  | 2.73789700  | 331.2004  |
|               | C           | -3.70755200 | -2.10209200 | 0.94265700  | 336.1141  |
|               | C           | -4.26961900 | -0.92081300 | 0.28171600  | 344.7615  |
|               | C           | -4.09651300 | -0.72976700 | -1.11838300 | 349.7453  |
|               | C           | -3.98279400 | 0.62072600  | -1.54480300 | 361.4201  |
|               | C           | -3.06101700 | -3.06593900 | 0.20854400  | 362.7546  |
|               | C           | -1.96072500 | -2.25745400 | 2.71977200  | 366.6118  |
|               | C           | -3.17654000 | -1.73523300 | 2.22069300  | 372.7400  |
|               | C           | -1.89718200 | -3.70415700 | 0.74238100  | 375.7418  |
|               | C           | -1.29431000 | -3.30138300 | 1.95147200  | 380.8488  |
|               | C           | -2.90312600 | -2.91473000 | -1.23660300 | 383.5927  |
|               | C           | -3.37901800 | -1.76083700 | -1.89884700 | 388.7069  |
|               | C           | -2.60538000 | -1.35722000 | -3.02800200 | 392.9194  |
|               | C           | -2.51243700 | 0.03501300  | -3.41289100 | 397.1279  |
|               | C           | -3.16712200 | 0.98944100  | -2.69746100 | 427.8263  |
|               | C           | 0.25199400  | -4.23156300 | -0.29449400 | 440.0889  |
|               | C           | -1.09780000 | -4.09562600 | -0.39775100 | 446.4420  |
|               | C           | -1.66803100 | -3.53124800 | -1.59855000 | 448.7741  |
|               | C           | -0.81535900 | -3.00911200 | -2.60964500 | 453.7879  |
|               | C           | -1.35520800 | -1.94344700 | -3.35394300 | 460.3776  |
| C             | 0.89006900  | -2.70235800 | 2.99119500  | 464.5837    |           |
| C             | 0.15857900  | -3.49834600 | 2.08085300  | 465.7462    |           |
| C             | 0.90045900  | -3.99128500 | 0.97407100  | 469.8518    |           |
| C             | -2.32508900 | 3.57983300  | -0.44431200 | 477.9319    |           |
| C             | -3.07474400 | 2.74305400  | -1.22712200 | 478.8166    |           |
| C             | -2.54287400 | 2.27787700  | -2.46338000 | 485.8781    |           |
| C             | -1.19113900 | 0.30624600  | -3.92518000 | 490.6993    |           |
| C             | 0.86819200  | 1.49425800  | -3.67723400 | 493.6098    |           |
| C             | -0.53584200 | 1.53799400  | -3.65932200 | 496.6788    |           |
| C             | -1.21627900 | 2.55410800  | -2.85437500 | 499.6448    |           |

|   |             |             |             |          |
|---|-------------|-------------|-------------|----------|
| C | -0.42599400 | 3.46200100  | -2.03288000 | 501.9507 |
| C | -1.03105400 | 3.99777000  | -0.88028300 | 503.0781 |
| C | 1.13022600  | -3.81808200 | -1.36919300 | 507.5519 |
| C | 0.64400100  | -3.11468100 | -2.48473800 | 508.8500 |
| C | 1.51317800  | -2.10779800 | -3.08990500 | 512.2413 |
| C | 0.91156100  | -0.97391100 | -3.79366900 | 513.7393 |
| C | -0.48619600 | -0.92110500 | -3.93119000 | 514.1245 |
| C | 1.58288500  | 0.27683700  | -3.80749700 | 517.9022 |
| C | 1.67005400  | 2.42084600  | -2.88380300 | 524.9659 |
| C | 1.03917500  | 3.35809500  | -2.03913800 | 526.1147 |
| C | 1.77051100  | 3.71391700  | -0.87844900 | 530.7019 |
| C | 1.07836000  | 4.10441300  | 0.33320400  | 532.4395 |
| C | -0.27331800 | 4.24701000  | 0.32837300  | 534.9267 |
| C | 3.44666400  | -0.60419500 | -2.53203000 | 538.6167 |
| C | 2.85595400  | 0.46015900  | -3.14693900 | 541.2249 |
| C | 2.89018500  | 1.78508900  | -2.54842200 | 545.4094 |
| C | 3.51430200  | 1.99232600  | -1.28888300 | 546.7272 |
| C | 2.95578100  | 3.02424600  | -0.50307900 | 558.8435 |
| C | 2.37593300  | -3.49241900 | -0.75740400 | 578.3130 |
| C | 3.19506000  | -2.55669800 | -1.33608600 | 584.8740 |
| C | 2.79428300  | -1.90560800 | -2.54136000 | 589.7435 |
| C | 2.23134500  | -2.31138000 | 2.73573400  | 593.9442 |
| C | 2.90316000  | -2.64028000 | 1.52262800  | 597.6380 |
| C | 2.22783100  | -3.55552200 | 0.69162800  | 607.4120 |
| C | 3.96637400  | -0.39913700 | 1.53806300  | 616.0646 |
| C | 3.23013400  | -0.08626800 | 2.75547700  | 616.4856 |
| C | 2.40781900  | -1.00597600 | 3.33805500  | 618.9981 |
| C | 3.95604900  | -1.63011900 | -0.51158300 | 629.7094 |
| C | 3.79698700  | -1.64679200 | 0.89770700  | 633.5616 |
| C | 2.95448900  | 2.94522700  | 0.95225400  | 637.0815 |
| C | 4.12199400  | -0.42788200 | -1.24908500 | 638.4362 |
| C | 4.14010600  | 0.84066800  | -0.61139100 | 644.6552 |
| C | 4.13463500  | 0.80323800  | 0.80524000  | 654.5811 |
| C | 3.51307100  | 1.86781200  | 1.58213600  | 657.8482 |
| C | 0.70672500  | 0.48855700  | 0.01453600  | 660.8581 |
| O | 1.47085900  | 0.13356900  | -0.84650400 | 664.3855 |
| O | -0.09858000 | 1.41487800  | 0.18182700  | 666.5926 |
| H | -1.36435300 | 0.44441200  | 0.03438000  | 670.1607 |
| O | 0.52594900  | -0.56360800 | 1.07144400  | 671.3107 |
| H | 1.15553900  | -1.27318000 | 0.84868800  | 673.9965 |
| H | -1.58352600 | -0.92095200 | -0.80100900 | 675.4802 |
| H | -0.63650200 | -0.81921000 | 0.68927200  | 682.1530 |
| O | -1.59693600 | -0.54565100 | 0.09779000  | 686.9725 |
|   |             |             |             | 691.2482 |
|   |             |             |             | 692.9630 |
|   |             |             |             | 694.6349 |
|   |             |             |             | 698.2832 |
|   |             |             |             | 700.4266 |
|   |             |             |             | 702.2167 |
|   |             |             |             | 713.4061 |

|  |  |                                                                                                                                                                                                                                                                                                                                                                                                                                                                                                                                                                                                                      |
|--|--|----------------------------------------------------------------------------------------------------------------------------------------------------------------------------------------------------------------------------------------------------------------------------------------------------------------------------------------------------------------------------------------------------------------------------------------------------------------------------------------------------------------------------------------------------------------------------------------------------------------------|
|  |  | 718.5278<br>719.9549<br>720.2195<br>720.6514<br>727.5998<br>727.8164<br>732.2139<br>736.0551<br>741.7482<br>743.3974<br>745.0013<br>749.1204<br>749.3106<br>751.2267<br>751.2895<br>753.0504<br>758.5614<br>759.6124<br>761.3264<br>762.0613<br>763.6263<br>765.3916<br>766.1630<br>766.6383<br>768.1712<br>768.4751<br>770.9312<br>772.5539<br>774.4183<br>776.4239<br>777.9918<br>779.3284<br>782.1962<br>786.2209<br>788.4823<br>808.0707<br>812.2408<br>824.8008<br>833.9392<br>838.7457<br>842.6120<br>843.4796<br>859.0344<br>870.3268<br>874.4834<br>877.1987<br>878.0193<br>886.3201<br>894.5600<br>913.8594 |
|--|--|----------------------------------------------------------------------------------------------------------------------------------------------------------------------------------------------------------------------------------------------------------------------------------------------------------------------------------------------------------------------------------------------------------------------------------------------------------------------------------------------------------------------------------------------------------------------------------------------------------------------|

|  |  |                                                                                                                                                                                                                                                                                                                                                                                                                                                                                                                                                                                                                                                                     |
|--|--|---------------------------------------------------------------------------------------------------------------------------------------------------------------------------------------------------------------------------------------------------------------------------------------------------------------------------------------------------------------------------------------------------------------------------------------------------------------------------------------------------------------------------------------------------------------------------------------------------------------------------------------------------------------------|
|  |  | 916.7738<br>920.2063<br>947.1909<br>1029.6370<br>1031.4478<br>1034.0129<br>1039.3427<br>1041.3054<br>1044.2456<br>1052.3392<br>1061.4785<br>1064.1776<br>1080.4386<br>1138.8952<br>1145.3580<br>1145.9671<br>1149.4246<br>1152.1652<br>1158.0440<br>1170.8120<br>1176.6951<br>1182.7373<br>1192.1451<br>1193.9384<br>1201.3458<br>1205.4552<br>1212.3450<br>1237.2204<br>1238.3323<br>1242.7130<br>1246.2683<br>1255.8840<br>1258.7028<br>1272.8083<br>1274.3908<br>1277.0708<br>1279.5179<br>1286.1394<br>1288.0165<br>1289.3793<br>1291.9444<br>1298.0114<br>1304.0714<br>1312.5027<br>1317.7599<br>1319.2182<br>1333.9751<br>1343.0118<br>1345.0332<br>1349.0639 |
|--|--|---------------------------------------------------------------------------------------------------------------------------------------------------------------------------------------------------------------------------------------------------------------------------------------------------------------------------------------------------------------------------------------------------------------------------------------------------------------------------------------------------------------------------------------------------------------------------------------------------------------------------------------------------------------------|

|  |  |                                                                                                                                                                                                                                                                                                                                                                                                                                                                                                                                                                                                                                                                        |
|--|--|------------------------------------------------------------------------------------------------------------------------------------------------------------------------------------------------------------------------------------------------------------------------------------------------------------------------------------------------------------------------------------------------------------------------------------------------------------------------------------------------------------------------------------------------------------------------------------------------------------------------------------------------------------------------|
|  |  | 1355.0636<br>1357.9638<br>1361.8274<br>1365.2451<br>1367.5877<br>1368.4134<br>1371.3309<br>1380.7919<br>1382.9403<br>1385.4208<br>1386.5433<br>1389.4619<br>1392.1723<br>1394.9156<br>1397.6171<br>1400.3839<br>1402.2675<br>1403.7897<br>1408.5000<br>1416.8684<br>1424.0420<br>1425.5438<br>1428.1412<br>1429.5938<br>1432.4455<br>1435.9365<br>1441.3631<br>1452.1988<br>1461.8653<br>1473.5883<br>1477.7710<br>1484.3371<br>1485.4003<br>1489.1516<br>1491.3410<br>1501.6207<br>1505.6326<br>1516.8485<br>1529.4911<br>1536.1337<br>1540.9916<br>1542.9652<br>1554.3328<br>1555.9737<br>1560.7070<br>1576.0892<br>1586.6365<br>1590.4723<br>1591.2741<br>1592.5816 |
|--|--|------------------------------------------------------------------------------------------------------------------------------------------------------------------------------------------------------------------------------------------------------------------------------------------------------------------------------------------------------------------------------------------------------------------------------------------------------------------------------------------------------------------------------------------------------------------------------------------------------------------------------------------------------------------------|



|               |   |             |             |             |                                                                                                                                                                                                                                                                                                         |
|---------------|---|-------------|-------------|-------------|---------------------------------------------------------------------------------------------------------------------------------------------------------------------------------------------------------------------------------------------------------------------------------------------------------|
|               |   |             |             |             | 1601.4705<br>1603.9647<br>1610.1438<br>1611.2087<br>1615.9222<br>1621.1419<br>1626.8680<br>1633.8816<br>1657.0151<br>1665.3940<br>1672.3087<br>1675.4702<br>1691.7222<br>1694.7846<br>1704.8279<br>1711.0887<br>1717.5013<br>1722.0434<br>1849.8492<br>2006.6717<br>2950.1418<br>3736.8211<br>3746.9068 |
| CW_WM<br>@C84 | C | -2.52776800 | -1.78361200 | -2.86794000 | 64.5441                                                                                                                                                                                                                                                                                                 |
|               | C | -3.17241400 | -2.19637000 | -1.66993700 | 76.5716                                                                                                                                                                                                                                                                                                 |
|               | C | -2.54525600 | -3.24778400 | -0.97315400 | 86.3889                                                                                                                                                                                                                                                                                                 |
|               | C | -1.23441300 | -2.24621600 | -3.21041600 | 161.6154                                                                                                                                                                                                                                                                                                |
|               | C | -0.54006400 | -3.20450300 | -2.43513800 | 163.2406                                                                                                                                                                                                                                                                                                |
|               | C | -1.27540300 | -3.75937500 | -1.35829800 | 174.0317                                                                                                                                                                                                                                                                                                |
|               | C | -3.95637500 | -1.21161900 | -0.90788900 | 182.0619                                                                                                                                                                                                                                                                                                |
|               | C | -4.04050000 | -1.34118300 | 0.50361500  | 220.3777                                                                                                                                                                                                                                                                                                |
|               | C | -2.62840400 | -0.41156500 | -3.33707800 | 221.4305                                                                                                                                                                                                                                                                                                |
|               | C | -3.35656400 | 0.50454700  | -2.63423900 | 225.0400                                                                                                                                                                                                                                                                                                |
|               | C | -4.05405600 | 0.10929500  | -1.41157600 | 227.9253                                                                                                                                                                                                                                                                                                |
|               | C | -1.36370200 | -0.01831700 | -3.91556100 | 239.4091                                                                                                                                                                                                                                                                                                |
|               | C | -0.84473900 | 1.29406200  | -3.72368400 | 269.1849                                                                                                                                                                                                                                                                                                |
|               | C | 0.55541800  | 1.40652300  | -3.76974200 | 278.2259                                                                                                                                                                                                                                                                                                |
|               | C | 0.87794600  | -1.05444800 | -3.76414400 | 281.2310                                                                                                                                                                                                                                                                                                |
|               | C | -0.51795900 | -1.16008000 | -3.86993700 | 287.8212                                                                                                                                                                                                                                                                                                |
|               | C | 1.39365800  | 0.26653200  | -3.84981900 | 289.4401                                                                                                                                                                                                                                                                                                |
|               | C | 1.63648300  | -2.08375000 | -3.03559500 | 295.4352                                                                                                                                                                                                                                                                                                |
|               | C | 1.54659700  | -3.76794400 | -1.23679700 | 299.1091                                                                                                                                                                                                                                                                                                |
|               | C | 0.92772900  | -3.16578800 | -2.36064600 | 301.8440                                                                                                                                                                                                                                                                                                |
|               | C | 2.90021900  | -1.71504000 | -2.53541300 | 308.0499                                                                                                                                                                                                                                                                                                |
|               | C | -3.39305900 | 2.32224800  | -1.22596300 | 321.7911                                                                                                                                                                                                                                                                                                |
|               | C | -4.06871400 | 1.22807300  | -0.54064000 | 331.3107                                                                                                                                                                                                                                                                                                |
|               | C | -3.99674500 | 1.10155700  | 0.87243500  | 335.6584                                                                                                                                                                                                                                                                                                |
|               | C | -4.06413600 | -0.22230500 | 1.37504300  | 337.8582                                                                                                                                                                                                                                                                                                |
|               | C | -2.70940900 | 3.26125000  | -0.50216700 | 344.5948                                                                                                                                                                                                                                                                                                |

|   |             |             |             |          |
|---|-------------|-------------|-------------|----------|
| C | -1.59921700 | 2.26944400  | -2.93123500 | 349.5196 |
| C | -2.87147000 | 1.86638800  | -2.47564100 | 362.5744 |
| C | -1.48451000 | 3.79431400  | -1.00735300 | 367.2268 |
| C | -0.87487100 | 3.28932800  | -2.16743800 | 369.4732 |
| C | -2.63887400 | 3.17235000  | 0.94900700  | 377.9786 |
| C | -3.24812300 | 2.10767900  | 1.64216300  | 379.3646 |
| C | -2.60515000 | 1.71432900  | 2.84732100  | 383.5029 |
| C | -2.67161000 | 0.33742000  | 3.31250900  | 386.1236 |
| C | -3.37074400 | -0.59824400 | 2.60618100  | 391.7165 |
| C | 0.64630900  | 4.23475200  | 0.11159000  | 392.9337 |
| C | -0.71219400 | 4.18508100  | 0.15284200  | 396.1715 |
| C | -1.38677900 | 3.71625200  | 1.34363900  | 406.6457 |
| C | -0.64757600 | 3.18041200  | 2.42469900  | 421.3250 |
| C | -1.32589200 | 2.20902000  | 3.19629400  | 448.5766 |
| C | 1.27753300  | 2.45620000  | -3.04501700 | 449.1045 |
| C | 0.59268700  | 3.37567600  | -2.22533100 | 452.7722 |
| C | 1.33402400  | 3.88307400  | -1.11567500 | 457.0100 |
| C | -2.62870700 | -3.34081700 | 0.47751000  | 461.1770 |
| C | -3.34006200 | -2.41516900 | 1.19356700  | 463.9444 |
| C | -2.84246500 | -1.94486800 | 2.44826000  | 471.6388 |
| C | -1.40160100 | -0.02217300 | 3.90434400  | 475.1779 |
| C | 0.55692800  | -1.39497300 | 3.77457000  | 477.1197 |
| C | -0.84494600 | -1.31960600 | 3.71719900  | 478.5901 |
| C | -1.56547200 | -2.31497300 | 2.91750200  | 486.2379 |
| C | -0.80802000 | -3.31827000 | 2.16125000  | 491.3950 |
| C | -1.39573200 | -3.84106000 | 0.99448800  | 497.4987 |
| C | 1.42990100  | 3.80608300  | 1.25240200  | 497.8980 |
| C | 0.81817200  | 3.18287500  | 2.36271700  | 498.3385 |
| C | 1.54687300  | 2.12133500  | 3.04242300  | 501.1810 |
| C | 0.81227700  | 1.07355300  | 3.76456700  | 504.2059 |
| C | -0.58627400 | 1.14076900  | 3.86107500  | 508.4172 |
| C | 1.36247900  | -0.23265000 | 3.85788700  | 509.7074 |
| C | 1.31341100  | -2.42117800 | 3.05410000  | 514.3287 |
| C | 0.66307100  | -3.36475000 | 2.23311900  | 515.2580 |
| C | 1.43199000  | -3.85243600 | 1.13048100  | 516.3511 |
| C | 0.76216000  | -4.21751700 | -0.10317200 | 521.4475 |
| C | -0.59919500 | -4.20597600 | -0.15915600 | 525.1132 |
| C | 3.33072000  | 0.42913700  | 2.62078300  | 529.3360 |
| C | 2.63002200  | -0.55055100 | 3.25294900  | 533.0506 |
| C | 2.58926500  | -1.89934800 | 2.72576900  | 536.1885 |
| C | 3.26958800  | -2.24028100 | 1.52675900  | 537.3451 |
| C | 2.69668200  | -3.29354400 | 0.77640200  | 541.4666 |
| C | 2.67425700  | 3.35077200  | 0.71382100  | 544.2184 |
| C | 3.35883800  | 2.35638300  | 1.36531600  | 546.4279 |
| C | 2.82591900  | 1.78851300  | 2.56168400  | 547.0068 |
| C | 2.56421500  | 1.96746600  | -2.70582700 | 559.7175 |
| C | 3.21899700  | 2.32267600  | -1.49580200 | 575.6575 |
| C | 2.60755200  | 3.35720300  | -0.74907400 | 584.9853 |
| C | 4.07083600  | -0.02617200 | -1.36029000 | 592.1319 |
| C | 3.36966900  | -0.34243600 | -2.59119900 | 594.3260 |

|   |             |             |             |          |
|---|-------------|-------------|-------------|----------|
| C | 2.64635000  | 0.61768200  | -3.22962400 | 597.2702 |
| C | 4.05272600  | 1.31316800  | 0.61542100  | 604.9705 |
| C | 3.97910300  | 1.27228400  | -0.79440800 | 607.3570 |
| C | 2.77583600  | -3.28290400 | -0.68634000 | 616.2712 |
| C | 4.05371100  | 0.12904200  | 1.39749000  | 616.5798 |
| C | 4.01012800  | -1.17134800 | 0.83114400  | 628.9819 |
| C | 4.10225200  | -1.20994100 | -0.57786100 | 632.9149 |
| C | 3.43867300  | -2.26837000 | -1.33311400 | 636.8209 |
| C | -1.11004900 | 0.05664300  | 0.00921200  | 637.5941 |
| O | -1.11108200 | -0.01562200 | -1.15172200 | 643.7986 |
| O | -1.13398500 | 0.02488800  | 1.16743000  | 654.4597 |
| H | 0.72065900  | -1.46189000 | -0.78924400 | 659.0268 |
| O | 0.85204000  | 1.40284100  | 0.02134700  | 659.5181 |
| H | 0.95897700  | 1.34511500  | -0.93633700 | 663.4716 |
| H | 0.62610400  | -1.65668500 | 0.74270000  | 666.1882 |
| H | 1.20389400  | 0.54690400  | 0.31765400  | 669.0474 |
| O | 1.10282900  | -1.17774100 | 0.05193200  | 669.5824 |
|   |             |             |             | 673.0793 |
|   |             |             |             | 675.5006 |
|   |             |             |             | 681.7916 |
|   |             |             |             | 687.5213 |
|   |             |             |             | 693.7842 |
|   |             |             |             | 695.0086 |
|   |             |             |             | 695.8325 |
|   |             |             |             | 700.3331 |
|   |             |             |             | 701.6021 |
|   |             |             |             | 702.8631 |
|   |             |             |             | 712.7940 |
|   |             |             |             | 719.2807 |
|   |             |             |             | 719.6755 |
|   |             |             |             | 720.9333 |
|   |             |             |             | 721.8186 |
|   |             |             |             | 728.5072 |
|   |             |             |             | 730.6639 |
|   |             |             |             | 734.2286 |
|   |             |             |             | 735.9109 |
|   |             |             |             | 741.6403 |
|   |             |             |             | 745.1981 |
|   |             |             |             | 746.0702 |
|   |             |             |             | 749.3262 |
|   |             |             |             | 750.0780 |
|   |             |             |             | 751.3476 |
|   |             |             |             | 752.6703 |
|   |             |             |             | 754.2591 |
|   |             |             |             | 758.1951 |
|   |             |             |             | 761.6031 |
|   |             |             |             | 761.8598 |
|   |             |             |             | 763.3548 |
|   |             |             |             | 765.7201 |
|   |             |             |             | 766.0633 |

|  |  |                                                                                                                                                                                                                                                                                                                                                                                                                                                                                                                                                                                                                                           |
|--|--|-------------------------------------------------------------------------------------------------------------------------------------------------------------------------------------------------------------------------------------------------------------------------------------------------------------------------------------------------------------------------------------------------------------------------------------------------------------------------------------------------------------------------------------------------------------------------------------------------------------------------------------------|
|  |  | 768.0512<br>768.9102<br>769.7700<br>770.5512<br>771.8895<br>772.5661<br>773.6474<br>775.3668<br>775.9724<br>777.5272<br>779.4421<br>786.9697<br>789.3140<br>807.3272<br>819.9671<br>824.2265<br>833.6532<br>838.3267<br>843.2794<br>857.3034<br>870.8519<br>873.8097<br>877.2781<br>884.5104<br>893.9342<br>913.3536<br>914.6154<br>920.5763<br>946.4663<br>1028.2619<br>1030.5364<br>1031.8022<br>1038.2853<br>1040.1636<br>1042.1811<br>1048.5466<br>1058.9919<br>1062.9326<br>1138.9691<br>1140.6483<br>1143.6843<br>1148.9736<br>1151.2498<br>1168.7859<br>1173.1787<br>1179.4949<br>1191.6064<br>1191.7983<br>1194.8964<br>1202.8604 |
|--|--|-------------------------------------------------------------------------------------------------------------------------------------------------------------------------------------------------------------------------------------------------------------------------------------------------------------------------------------------------------------------------------------------------------------------------------------------------------------------------------------------------------------------------------------------------------------------------------------------------------------------------------------------|

|  |  |                                                                                                                                                                                                                                                                                                                                                                                                                                                                                                                                                                                                                                                                        |
|--|--|------------------------------------------------------------------------------------------------------------------------------------------------------------------------------------------------------------------------------------------------------------------------------------------------------------------------------------------------------------------------------------------------------------------------------------------------------------------------------------------------------------------------------------------------------------------------------------------------------------------------------------------------------------------------|
|  |  | 1213.4469<br>1233.3827<br>1236.9738<br>1243.6541<br>1244.1071<br>1252.5185<br>1261.4882<br>1270.4959<br>1273.2264<br>1275.1850<br>1276.2479<br>1284.6676<br>1285.4862<br>1287.2972<br>1290.2810<br>1297.7670<br>1299.3045<br>1309.5398<br>1315.1534<br>1317.7424<br>1333.3424<br>1340.4919<br>1344.8268<br>1346.3039<br>1353.0301<br>1355.6895<br>1358.7658<br>1365.2752<br>1367.1786<br>1370.2990<br>1371.4581<br>1374.3985<br>1381.0920<br>1382.2262<br>1385.0354<br>1386.6281<br>1391.3460<br>1393.8849<br>1394.0803<br>1396.0884<br>1397.6631<br>1398.4977<br>1407.7308<br>1415.2557<br>1419.5225<br>1423.8356<br>1428.1563<br>1430.8395<br>1434.6661<br>1437.2419 |
|--|--|------------------------------------------------------------------------------------------------------------------------------------------------------------------------------------------------------------------------------------------------------------------------------------------------------------------------------------------------------------------------------------------------------------------------------------------------------------------------------------------------------------------------------------------------------------------------------------------------------------------------------------------------------------------------|

|  |  |                                                                                                                                                                                                                                                                                                                                                                                                                                                                                                                                                                                                                                 |
|--|--|---------------------------------------------------------------------------------------------------------------------------------------------------------------------------------------------------------------------------------------------------------------------------------------------------------------------------------------------------------------------------------------------------------------------------------------------------------------------------------------------------------------------------------------------------------------------------------------------------------------------------------|
|  |  | 1440.0284<br>1447.3379<br>1457.1895<br>1469.5010<br>1474.1302<br>1483.3289<br>1485.0351<br>1485.9950<br>1487.5958<br>1498.6113<br>1515.1193<br>1529.2419<br>1532.1937<br>1537.1539<br>1540.9288<br>1552.3777<br>1554.5223<br>1559.1942<br>1577.9035<br>1583.4917<br>1586.6101<br>1590.5095<br>1592.4097<br>1599.5751<br>1605.5846<br>1607.3816<br>1611.0279<br>1612.8889<br>1618.4407<br>1625.0178<br>1632.0134<br>1654.8785<br>1660.8897<br>1667.1282<br>1670.3549<br>1685.9225<br>1691.9358<br>1699.5516<br>1703.4243<br>1710.5211<br>1713.0889<br>1719.1862<br>2485.2907<br>3742.8682<br>3828.6415<br>3909.3966<br>3925.2871 |
|  |  |                                                                                                                                                                                                                                                                                                                                                                                                                                                                                                                                                                                                                                 |
|  |  |                                                                                                                                                                                                                                                                                                                                                                                                                                                                                                                                                                                                                                 |

**Table S3:** Absolute Energies (hartree) obtained at DLPNO-CCSD(T)/cc-pVTZ//M06-2X/6-31G\*\* level of theory:

| Species | Energies (hartree) |
|---------|--------------------|
| CA      | -264.6510927077    |
| TS      | -264.579990145     |
| CW      | -264.6613799754    |
|         |                    |
| C60     | -2281.8826454644   |
| CA@C60  | -2546.4727654895   |
| TS@C60  | -2546.4030795018   |
| CW@C60  | -2546.4272108122   |
|         |                    |
| C-70    | -2662.2913583755   |
| CA@C70  | -2926.9582848478   |
| TS@C70  | -2926.8920316182   |
| CW@C70  | -2926.9386901374   |
|         |                    |
| C-84    | -3194.8603842834   |
| CA@C84  | -3459.5573921454   |
| TS@C84  | -3459.4877625103   |
| CW@C84  | -3459.5535919491   |

**Table S4:** Absolute Energies (hartree) in presence of OEEF obtained at M06-2X/6-31G\*\* level of theory:

|        | Field Free  | X+003       | X+006       | X+009       | X+012       | X+024       |
|--------|-------------|-------------|-------------|-------------|-------------|-------------|
| CA     | -264.90220  | -264.90211  | -264.90226  | -264.90261  | -264.90317  | -264.90746  |
| TS     | -264.83088  | -264.83406  | -264.83748  | -264.84114  | -264.84502  | -264.86289  |
| CW     | -264.90087  | -264.89844  | -264.89844  | -264.89399  | -264.89196  | -264.89399  |
| CA@C60 | -2550.29297 | -2550.29526 | -2550.30183 | -2550.31264 | -2550.32769 | -2550.43045 |
| TS@C60 | -2550.22295 | -2550.22564 | -2550.23289 | -2550.24437 | -2550.26010 | -2550.36554 |
| CW@C60 | -2550.24438 | -2550.24854 | -2550.25669 | -2550.26906 | -2550.28567 | -2550.39443 |
| CA@C70 | -2931.38288 | -2931.38584 | -2931.39425 | -2931.40810 | -2931.42742 | -2931.55979 |
| TS@C70 | -2931.31450 | -2931.31811 | -2931.32715 | -2931.34165 | -2931.36159 | -2931.49634 |
| CW@C70 | -2931.35424 | -2931.35609 | -2931.36394 | -2931.37726 | -2931.39606 | -2931.52672 |
| CA@C84 | -3464.81805 | -3464.82062 | -3464.83035 | -3464.84668 | -3464.86960 | -3465.02772 |
| TS@C84 | -3464.74660 | -3464.74923 | -3464.75844 | -3464.77425 | -3464.79667 | -3464.95285 |
| CW@C84 | -3464.80615 | -3464.80904 | -3464.81866 | -3464.83489 | -3464.85775 | -3465.01591 |

**Table S5:** Equilibrium constants in presence of OEEF along X axis for the uncatalyzed decomposition reaction of CA in gas phase:

| OEEF(in au) | Keq      |
|-------------|----------|
| X+0.003     | 1.30E+07 |
| X+0.006     | 1.12E+07 |
| X+0.009     | 6.86E+04 |
| X+0.012     | 4.43E+03 |
| X+0.024     | 4.00E+02 |
